# Supplementary material for: Long-Term Subculture Affects Rooting Competence via Changes in the Hormones and Protein Profiles in Cedrela Fissilis Vell. (Meliaceae) Shoots
Source: Research Square preprint supplement (doi:10.21203/rs.3.rs-689426/v1), 2021-07-16
Supplement: Supplementary file 1 [file 30b62314f8b93b6c7082df7c.xlsx]

## Sheet: All Proteins
Supplementary Table 1. Complete list of all identified proteins of Cedrela fissilis comparing shoots from the fourth subculture (S4) with shoots from the first subculture (S1). Proteins were deemed up-accumulated if the log2 value of the fold change (FC) was greater than 0.6 and down-accumulated if the log2 value of the FC was less than -0.6, as determined by Student’s t-Test (two-tailed; P < 0.0…
Accession	Reported Peptide	Max score	Description	Biological Process	Normalized Total Ion Count (Tic)						Average		t-Test	Log2 of Fold Change	Differential accumulation
					S1-1	S1-2	S1-3	S4-1	S4-2	S4-3	S1	S4	S4 / S1	S4 / S1	S4 / S1
Ce_fissilis.015866.1	15	35693.3	Secoisolariciresinol dehydrogenase	Metabolic process	165756	192412	213760	355512	383882	298745	190643	346047	0.00558197	0.860094	UP
Ce_fissilis.002414.1	14	22731.4	Alcohol dehydrogenase 2	Catabolic process; cellular process; response to chemical	241541	247849	270286	412051	386681	407403	253225	402045	0.000220084	0.666937	UP
Ce_fissilis.006379.1	8	21868.5	Osmotin-like protein OSML13	Response to stress; response to external stimulus; response to biotic stimulus	136237	169990	203450	340624	230771	388953	169892	320116	0.0413424	0.913974	UP
Ce_fissilis.005206.1	12	19619	Membrane steroid-binding protein 1	-	100904	111676	125685	191989	242417	207211	112755	213872	0.00364652	0.923561	UP
Ce_fissilis.008801.1	15	18668.3	Peroxidase 4	Response to stress; catabolic process; cellular process; response to stimulus; response to chemical	129384	129478	139730	317326	336299	341352	132864	331659	1.6188e-05	1.31975	UP
Ce_fissilis.003326.2	14	17892.3	Polygalacturonase inhibitor	-	81202	91768.7	105479	445133	419515	359453	92816.6	408034	0.000279645	2.13623	UP
Ce_fissilis.011438.1	4	17104.3	Malate dehydrogenase, cytoplasmic	Carbohydrate metabolic process; generation of precursor metabolites and energy	8115.26	8308.5	9008.72	36772.2	28960.3	25019.4	8477.49	30250.6	0.00327283	1.83525	UP
Ce_fissilis.002902.1	9	16551.8	Kunitz trypsin inhibitor 2	Cellular process; protein metabolic process	259679	250870	272762	456655	503247	495456	261104	485119	0.000141904	0.893717	UP
Ce_fissilis.009721.1	3	16392.3	Putative phosphatidylglycerol/phosphatidylinositol transfer protein DDB_G0282179	Transport	131439	78453.5	85136	144596	170011	164802	98342.9	159803	0.0287084	0.7004	UP
Ce_fissilis.012486.1	7	16058.1	Proteasome subunit beta type-1	Catabolic process; cellular process; protein metabolic process	92711.3	93687.3	95028.3	129400	183765	153226	93809	155464	0.0173188	0.728781	UP
Ce_fissilis.006148.1	7	15844.1	Glyceraldehyde-3-phosphate dehydrogenase, cytosolic	Carbohydrate metabolic process; generation of precursor metabolites and energy; nucleobase-containing compound metabolic process; catabolic process	16317.1	15606.1	13085.7	41993.5	34160.4	31080	15003	35744.6	0.0036263	1.25248	UP
Ce_fissilis.002712.1	16	14444.3	Probable fructokinase-4	Carbohydrate metabolic process	131706	119980	138033	215397	239822	220805	129906	225341	0.000467532	0.794638	UP
Ce_fissilis.003482.2	9	11591.8	Endochitinase	Carbohydrate metabolic process; catabolic process; cellular process	30352.7	36328.7	50473	200401	207793	219974	39051.4	209389	3.25902e-05	2.42274	UP
Ce_fissilis.013185.1	17	11114.5	Heat shock cognate 70 kDa protein	Response to stress; metabolic process; response to abiotic stimulus; cellular process; response to chemical	38631.2	30432.6	34303.1	107460	133249	117781	34455.6	119497	0.0004138	1.79416	UP
Ce_fissilis.015659.1	13	10832.7	Peroxidase 4	Response to stress; catabolic process; response to stimulus; response to external stimulus; response to biotic stimulus; cellular process; response to chemical	94814.3	87019	89750.7	286100	291085	294098	90528	290427	4.25761e-07	1.68174	UP
Ce_fissilis.005901.1	8	9765.91	Putative methyltransferase DDB_G0268948	Metabolic process	37485.7	33004.3	39053.7	185625	199722	152521	36514.6	179289	0.000536302	2.29575	UP
Ce_fissilis.015956.1	9	9087.88	Chalcone--flavonone isomerase	Biosynthetic process	36182.7	39883.7	47400.7	134696	161339	133317	41155.7	143117	0.00046284	1.79803	UP
Ce_fissilis.012362.1	5	9037.21	Epidermis-specific secreted glycoprotein EP1	Cell communication; pollination	107451	112274	117171	187482	188199	176176	112299	183952	0.00011723	0.711991	UP
Ce_fissilis.009901.1	12	8216.83	Proteasome subunit alpha type-4	Catabolic process; cellular process; protein metabolic process	71517.7	77136	80915.7	118212	151842	126351	76523.1	132135	0.00608436	0.788044	UP
Ce_fissilis.006915.1	7	8196.52	Probable NAD(P)H dehydrogenase (quinone) FQR1-like 1	Metabolic process	53552.7	63240	61928.3	89141.3	104180	83218	59573.7	92179.7	0.00930913	0.629774	UP
Ce_fissilis.000745.2	12	7409.71	Alpha-galactosidase 1	Carbohydrate metabolic process	33532.5	31093.1	34921.1	84627.5	96719.5	58888	33182.2	80078.3	0.0138856	1.271	UP
Ce_fissilis.014551.1	9	7215.39	Cysteine-rich repeat secretory protein 38	Response to abscisic acid	13095.7	12481.3	14847	82606	89147.7	86145.3	13474.7	85966.3	3.59179e-06	2.67352	UP
Ce_fissilis.012697.1	14	7211.35	Heat shock cognate 70 kDa protein 2	Metabolic process	8584.71	7414.53	7188.16	25432.2	32975.9	29166.8	7729.13	29191.7	0.000640783	1.91718	UP
Ce_fissilis.003219.1	6	7080.16	Probable chalcone--flavonone isomerase 3	-	35849.7	37396.3	40265.7	101510	103736	86133	37837.2	97126.3	0.000476997	1.36006	UP
Ce_fissilis.007193.1	14	6846	Glucan endo-1,3-beta-glucosidase	Carbohydrate metabolic process	48494.3	54249.3	65213	121849	117406	107107	55985.6	115454	0.000823487	1.04419	UP
Ce_fissilis.006770.1	14	6438.14	Enolase	Carbohydrate metabolic process; generation of precursor metabolites and energy; nucleobase-containing compound metabolic process; catabolic process	11248.6	12101.9	11561.3	23920.3	19800.1	18847.8	11637.2	20856	0.00426472	0.841715	UP
Ce_fissilis.009238.1	20	6170.12	Pyruvate decarboxylase 1	-	87771.2	92745.5	91437.4	179714	225084	164499	90651.4	189766	0.00558509	1.06582	UP
Ce_fissilis.006261.1	12	5783.52	Caffeoyl-CoA O-methyltransferase 1	Metabolic process; response to stimulus	37660.7	46954	44002	116236	122500	87672.7	42872.2	108803	0.00398096	1.3436	UP
Ce_fissilis.008054.1	5	5386.71	NADP-dependent malic enzyme 4, chloroplastic	Metabolic process; cellular component organization	5839.69	5058.7	4042.47	113678	52934.5	58743.5	4980.29	75118.7	0.0222989	3.91487	UP
Ce_fissilis.012383.1	20	5146.7	Mitochondrial-processing peptidase subunit alpha	Transport; cellular component organization; protein metabolic process	59165.7	71721	99065.7	117777	143738	112601	76650.8	124705	0.034247	0.702152	UP
Ce_fissilis.000573.1	2	4912.92	Wound-induced protein WIN2	Response to stress; response to external stimulus; response to biotic stimulus	14184.9	8775.95	19423.4	51315	50369.3	73527.4	14128.1	58403.9	0.00561253	2.0475	UP
Ce_fissilis.008304.1	11	4840.92	Alpha-galactosidase 3	Carbohydrate metabolic process	120787	135013	143930	209541	210001	190376	133243	203306	0.00168945	0.609591	UP
Ce_fissilis.013077.2	14	4711.28	Aspartic proteinase A1	Lipid metabolic process; protein metabolic process	95040.7	108886	116138	181086	172680	170013	106688	174593	0.000642915	0.710594	UP
Ce_fissilis.016449.1	2	4596.62	Ribulose-phosphate 3-epimerase, cytoplasmic isoform	Carbohydrate metabolic process; generation of precursor metabolites and energy; catabolic process	43359.5	48508	55227.5	68377.5	97228.5	69709.5	49031.7	78438.5	0.0424967	0.677848	UP
Ce_fissilis.010325.1	10	4558.44	Berberine bridge enzyme-like 26	Metabolic process	2515	27455	29507.3	100276	109884	106349	19825.8	105503	0.00071483	2.41183	UP
Ce_fissilis.015598.1	10	4484.1	Heat shock 70 kDa protein	Response to stress; metabolic process; response to abiotic stimulus; cellular process; response to chemical	5993.58	5464.46	5913.72	14171.9	18721.8	16297.8	5790.59	16397.2	0.00131944	1.50167	UP
Ce_fissilis.018028.1	3	4335.85	Cysteine proteinase inhibitor	Cellular process; protein metabolic process	9996.67	16908.3	25088.7	37731.7	31635	30672	17331.2	33346.2	0.0306404	0.94415	UP
Ce_fissilis.000421.1	10	4237.89	Pectinesterase 2	Carbohydrate metabolic process; catabolic process; cellular component organization	6753.9	7199.97	7905.41	115596	103129	121860	7286.43	113528	4.28023e-05	3.9617	UP
Ce_fissilis.013923.2	4	4226.45	Peroxidase 15	Response to stress; catabolic process; cellular process; response to chemical	474.762	2707.19	5220.3	20061.1	21592.6	20590.7	2800.75	20748.1	0.000239891	2.8891	UP
Ce_fissilis.016439.2	5	3875.26	Stem-specific protein TSJT1	-	18701	23005.7	15382	109372	52882	107355	19029.6	89869.4	0.0190767	2.23959	UP
Ce_fissilis.011362.1	17	3568.74	UDP-glucose 6-dehydrogenase 1	Nucleobase-containing compound metabolic process; biosynthetic process	49047.1	46502.7	46146.4	103791	115811	112130	47232.1	110577	6.61981e-05	1.22722	UP
Ce_fissilis.014796.1	4	3508.93	Succinate dehydrogenase subunit 5, mitochondrial	-	29667.3	30507	33096.3	46958	50765.3	46345.3	31090.2	48022.9	0.000604171	0.627261	UP
Ce_fissilis.017860.1	13	3465.7	Pyruvate decarboxylase 1	-	37513.1	42013.2	46362.9	81138.2	95715.6	83455.7	41963.1	86769.9	0.000993036	1.04807	UP
Ce_fissilis.010805.1	14	3315.25	Protein DNA-DAMAGE INDUCIBLE 1	Protein metabolic process	58395.7	61302.7	57401	88944.3	113793	92817	59033.1	98518	0.00719241	0.738863	UP
Ce_fissilis.012147.1	5	3233.3	Nuclear transport factor 2B	Transport	43431.3	46865.7	43288.3	71299	75307.7	63228.3	44528.4	69945	0.00244785	0.651494	UP
Ce_fissilis.006369.1	6	3177.62	Cysteine protease RD19A	Protein metabolic process	32615.5	29045	34964.9	48582.4	67241	51019.3	32208.5	55614.2	0.0185411	0.788014	UP
Ce_fissilis.018656.2	4	3107.01	Aspartate aminotransferase, cytoplasmic	Biosynthetic process; cellular process	40408.1	42871.7	47963.6	74413.2	79363	74220.7	43747.8	75999	0.000319682	0.79677	UP
Ce_fissilis.017631.1	8	2913.8	3-isopropylmalate dehydrogenase, chloroplastic	Biosynthetic process; cellular process	41028.3	46918.3	48794.3	63148.3	95419	70426.7	45580.3	76331.3	0.0376492	0.743864	UP
Ce_fissilis.002863.1	3	2754.27	Germin-like protein subfamily 1 member 13	-	7202	7252	9626	22945.3	27164	23268	8026.67	24459.1	0.000475606	1.6075	UP
Ce_fissilis.013176.1	6	2710.22	L-lactate dehydrogenase A	Carbohydrate metabolic process; cellular process	26707	28594.3	33451.7	52263.3	48151.7	55618.7	29584.3	52011.2	0.00160489	0.81399	UP
Ce_fissilis.008583.1	3	2601.22	Peroxidase 53	Response to stress; catabolic process; cellular process; response to chemical	51273.7	52825.3	57973	186898	148421	120202	54024	151840	0.00731805	1.49088	UP
Ce_fissilis.013981.1	7	2289.52	Mitochondrial outer membrane protein porin 2	Transport	17666.7	19527.3	29265.7	62671	54605.7	72280	22153.2	63185.6	0.00278103	1.51208	UP
Ce_fissilis.018551.1	7	2061.99	Ubiquitin receptor RAD23c	Dna metabolic process; transport; response to stress; catabolic process	39560.5	44886.7	57464.3	73206.4	69528.9	79256.7	47303.9	73997.3	0.0113718	0.645515	UP
Ce_fissilis.017206.1	4	1915.62	Short-chain dehydrogenase reductase 3b	Metabolic process	21879	23476.3	25482	48807.3	33222.7	41213.7	23612.4	41081.2	0.0193971	0.798932	UP
Ce_fissilis.014293.1	11	1899.97	Probable acetyl-CoA acetyltransferase, cytosolic 2	Lipid metabolic process; pollination; cellular component organization; cell growth; cell differentiation; anatomical structure development	29906.3	31767.7	42121.3	76267	88110.7	64781	34598.4	76386.2	0.00567731	1.14261	UP
Ce_fissilis.006103.1	5	1806.98	Cysteine-rich repeat secretory protein 38	Response to abscisic acid	18569	13151	13753	50050	62016.7	38254.3	15157.7	50107	0.00780083	1.72496	UP
Ce_fissilis.018507.1	7	1780.72	Probable pectinesterase/pectinesterase inhibitor 41	Carbohydrate metabolic process; catabolic process; cellular component organization	20572	18510.7	19657	103120	87380	84256	19579.9	91585.4	0.000253298	2.22575	UP
Ce_fissilis.010676.1	8	1695.36	Dihydrolipoyllysine-residue succinyltransferase component of 2-oxoglutarate dehydrogenase complex 2, mitochondrial	Generation of precursor metabolites and energy	50290	52197.7	53418.3	138513	117379	107038	51968.7	120977	0.00176557	1.21902	UP
Ce_fissilis.006464.1	3	1654.08	Cysteine proteinase RD21A	Catabolic process; cellular process; protein metabolic process	21461.5	24265.5	25321	87356.5	67210	52803.3	23682.7	69123.3	0.01078	1.54534	UP
Ce_fissilis.014369.1	2	1617.27	NAC domain-containing protein 2	Regulation of transcription, dna-templated	29656	31305	33467	45031	53505.5	58601.5	31476	52379.3	0.00704321	0.734745	UP
Ce_fissilis.018301.1	3	1507.09	Probable cysteine protease RD21C	Catabolic process; cellular process; protein metabolic process	23612	24386	25250.3	33666.7	40495.7	38370.7	24416.1	37511	0.00320928	0.61948	UP
Ce_fissilis.016610.3	3	1481.76	12-oxophytodienoate reductase 1	Metabolic process	18713.5	21415.2	24742.2	51123.2	52859.3	49895.6	21623.6	51292.7	0.000107477	1.24614	UP
Ce_fissilis.012560.1	2	1448.93	Endochitinase EP3	Carbohydrate metabolic process; catabolic process; cellular process	13650.5	13797	15768.5	69578.5	40784.5	45189.5	14405.3	51850.8	0.0140357	1.84776	UP
Ce_fissilis.017212.1	2	1433.21	Pathogenesis-related protein 1	-	23592.2	12598.7	16112.3	40538.8	29504.6	56554.5	17434.4	42199.3	0.0434566	1.27528	UP
Ce_fissilis.014524.1	3	1389.76	Proliferating cell nuclear antigen	Dna metabolic process; response to stress; biosynthetic process	30524.7	34096	36507.3	47493.3	51750	56183.5	33709.3	51808.9	0.00405157	0.620053	UP
Ce_fissilis.004398.2	6	1316.02	Ubiquitin receptor RAD23c	Dna metabolic process; response to stress; catabolic process; protein metabolic process	18473.4	20443.1	25232.6	34123.8	31470.2	34085.9	21383	33226.6	0.00566894	0.635874	UP
Ce_fissilis.005821.1	8	1227.5	Cysteine synthase	Biosynthetic process; cellular process	11959.7	14308	14183	17613.3	22368.3	23799	13483.6	21260.2	0.0182829	0.656956	UP
Ce_fissilis.011695.1	2	1178.5	Acyl-coenzyme A oxidase 4, peroxisomal	Reproduction; lipid metabolic process; catabolic process; embryo development; post-embryonic development; cellular process	19367	21936	20115	28228	32081	35464	20472.7	31924.3	0.00676122	0.640957	UP
Ce_fissilis.013421.1	5	1117.34	Probable inactive purple acid phosphatase 27	Metabolic process; cellular process	19538	20910	26594.7	41948	45634.7	47257.3	22347.6	44946.7	0.00106912	1.0081	UP
Ce_fissilis.003483.1	3	1099.69	Basic endochitinase A	Carbohydrate metabolic process; catabolic process; cellular process	6396	6656	10534	86107	54111	57179	7862	65799	0.00487792	3.0651	UP
Ce_fissilis.003624.1	2	1077.91	PITH domain-containing protein 1	-	6653	6355.5	7331	10082	11199	10524	6779.83	10601.7	0.000921633	0.644969	UP
Ce_fissilis.007644.1	3	1053.68	26S proteasome non-ATPase regulatory subunit 8 homolog A	Protein metabolic process	12130	11813.3	14159.7	19438.5	26944	22782.5	12701	23055	0.0106789	0.860138	UP
Ce_fissilis.000459.1	6	984.016	Probable pectinesterase/pectinesterase inhibitor 40	Carbohydrate metabolic process; catabolic process; cellular component organization	29374.8	31972.4	33562.9	49592.9	44289.4	53099.3	31636.7	48993.9	0.00361331	0.631002	UP
Ce_fissilis.011010.1	8	972.373	Peroxidase 72	Response to stress; catabolic process; cellular process; response to chemical	17127.3	13782	15345.7	39619.7	48759	46972.7	15418.3	45117.1	0.00055403	1.54903	UP
Ce_fissilis.016477.2	6	918.457	UBP1-associated protein 2C	-	22375.6	23077.1	27085.3	34841.2	41072.4	40812.5	24179.4	38908.7	0.00420344	0.686317	UP
Ce_fissilis.010412.1	3	892.606	Lactoylglutathione lyase	-	15238	16923.3	16163	40661	40119	41334	16108.1	40704.7	2.1272e-06	1.33741	UP
Ce_fissilis.018749.1	3	878.503	3-oxoacyl-[acyl-carrier-protein] synthase III, chloroplastic	Lipid metabolic process; biosynthetic process; cellular process	9887.67	10290	10873	15094.3	19559.7	17663.3	10350.2	17439.1	0.00588738	0.752665	UP
Ce_fissilis.002037.1	3	853.311	NADPH-dependent aldehyde reductase-like protein, chloroplastic	Metabolic process	24040.3	25455	25145.7	38878.7	42915	38869	24880.3	40220.9	0.000409435	0.692939	UP
Ce_fissilis.002297.1	2	792.966	Prohibitin-3, mitochondrial	-	17381.5	17492	17561	35403.5	52654	41279.5	17478.2	43112.3	0.00716868	1.30255	UP
Ce_fissilis.010786.1	5	726.676	Glutathione hydrolase 3	Catabolic process; cellular process; protein metabolic process	9949.67	11731	9802	49522.3	56142.3	36513.3	10494.2	47392.7	0.00312715	2.17507	UP
Ce_fissilis.008123.1	3	641.532	calcium-binding EF hand family protein	-	13792.3	14013.7	16037.3	24592.3	23886.3	35971.5	14614.4	28150.1	0.0272683	0.945743	UP
Ce_fissilis.015744.1	3	591.789	Homoserine kinase	Response to external stimulus; response to biotic stimulus	13366	13702.3	15673	26211	28993	18239.7	14247.1	24481.2	0.036237	0.781006	UP
Ce_fissilis.002664.1	3	520.078	Hexokinase-2, chloroplastic	Carbohydrate metabolic process; generation of precursor metabolites and energy; nucleobase-containing compound metabolic process; catabolic process; cellular homeostasis	13732	14168.7	17082.3	109177	134656	94972.7	14994.3	112935	0.00109796	2.91301	UP
Ce_fissilis.000871.1	2	441.724	-	-	15736	13273	16526	24519	27215	27968	15178.3	26567.3	0.00136019	0.80764	UP
Ce_fissilis.002419.1	2	432.07	Probable glucan 1,3-beta-glucosidase A	Carbohydrate metabolic process; cellular component organization	11009.5	15088.5	18344	43307.5	39617	44582	14814	42502.2	0.00043503	1.52058	UP
Ce_fissilis.018570.1	2	425.344	Small nuclear ribonucleoprotein-associated protein B'	Nucleobase-containing compound metabolic process	8636	11785.5	16559.5	18282.5	26712	27343	12327	24112.5	0.0339074	0.96796	UP
Ce_fissilis.015339.1	2	771.309	Cytochrome b561 and DOMON domain-containing protein At4g12980	Oxidation-reduction process				37004.8	48102.6	45498.7	0	43535.4	-	-	Unique S4
Ce_fissilis.001385.1	2	573.8	Allene oxide cyclase, chloroplastic	Jasmonic acid biosynthetic process; response to wounding; auxin-activated signaling pathway				134407	134613	134138	0	134386	-	-	Unique S4
Ce_fissilis.016967.1	15	48269	Beta carbonic anhydrase 1, chloroplastic	Catabolic process; energy metabolism; cellular process	434545	407810	405120	96873.3	82561.2	74104.7	415825	84513.1	8.65549e-06	-2.29873	DOWN
Ce_fissilis.011041.1	35	41507.7	ATP synthase subunit beta, chloroplastic	Nucleobase-containing compound metabolic process; transport; biosynthetic process	613610	608995	604338	307952	395720	317207	608981	340293	0.000656466	-0.83962	DOWN
Ce_fissilis.018684.1	35	41412	Ribulose bisphosphate carboxylase/oxygenase activase 1, chloroplastic	Response to light stimulus; energy metabolism; leaf senescence; response to light stimulus	792522	758981	729058	415377	438603	347621	760187	400534	0.000396617	-0.92443	DOWN
Ce_fissilis.007229.1	22	35709.4	Phosphoglycerate kinase 2, chloroplastic	Carbohydrate metabolic process; energy metabolism; generation of precursor metabolites and energy; nucleobase-containing compound metabolic process; catabolic process; biosynthetic process; response to chemical	369015	351631	334133	135457	166498	133491	351593	145149	0.000148588	-1.27638	DOWN
Ce_fissilis.001790.1	12	35644.3	Photosystem I reaction center subunit II, chloroplastic	Photosynthesis	273873	292725	275874	107678	127764	96508	280824	110650	9.91911e-05	-1.34366	DOWN
Ce_fissilis.012078.1	11	30421.4	Actin	-	20233.3	18585	21134.1	11283.2	15038.7	11232.3	19984.1	12518.1	0.00699745	-0.674841	DOWN
Ce_fissilis.007079.1	16	27533.3	Fructose-bisphosphate aldolase 2, chloroplastic	Carbohydrate metabolic process; generation of precursor metabolites and energy; nucleobase-containing compound metabolic process; catabolic process	454531	445769	412333	190802	213676	202432	437544	202304	8.34011e-05	-1.11291	DOWN
Ce_fissilis.013959.1	12	25179.4	Tubulin beta-4 chain	Cell cycle; cellular component organization	62982.3	55187	59651.1	27687.9	37953.1	30632.6	59273.5	32091.2	0.00201385	-0.88521	DOWN
Ce_fissilis.018513.1	24	25108	Ribulose bisphosphate carboxylase/oxygenase activase 1, chloroplastic	Response to light stimulus; energy metabolism; leaf senescence; response to light stimulus	85355.1	81742.7	78520	31033.7	33913.3	25938	81872.6	30295	7.21735e-05	-1.4343	DOWN
Ce_fissilis.013782.1	27	23575.9	Epidermis-specific secreted glycoprotein EP1	Cell communication; pollination	479547	460808	447968	257913	272391	252775	462774	261027	4.99333e-05	-0.826113	DOWN
Ce_fissilis.014748.1	10	22210.8	ADP-ribosylation factor 2	-	190097	224126	210958	133735	101486	88719.7	208394	107980	0.00381862	-0.948546	DOWN
Ce_fissilis.000008.2	6	21505.7	Chlorophyll a-b binding protein 8, chloroplastic	Generation of precursor metabolites and energy; cellular protein modification process; photosynthesis	243258	253314	280171	147908	166578	129420	258914	147969	0.00195681	-0.807181	DOWN
Ce_fissilis.016769.1	5	20839.3	Chlorophyll a-b binding protein, chloroplastic	Generation of precursor metabolites and energy; cellular protein modification process; photosynthesis	23160.1	21418.8	24622.2	10352.5	13184.1	11290.7	23067	11609.1	0.000775212	-0.990576	DOWN
Ce_fissilis.016667.1	15	20359.9	Phosphoglycerate kinase, cytosolic	Carbohydrate metabolic process; energy metabolism; generation of precursor metabolites and energy; nucleobase-containing compound metabolic process; catabolic process	171840	141528	118719	64582.4	58473.8	54082	144029	59046.1	0.00562289	-1.28645	DOWN
Ce_fissilis.016012.1	11	19872.5	Glyceraldehyde-3-phosphate dehydrogenase, cytosolic	Carbohydrate metabolic process	104826	96415.2	80649.4	60861.3	52834.6	56793.3	93963.6	56829.7	0.0075928	-0.725457	DOWN
Ce_fissilis.015772.1	9	19632.1	Peroxiredoxin-2E, chloroplastic	Metabolic process; cellular homeostasis; response to chemical	243619	258097	277410	120101	140131	120957	259709	127063	0.000353339	-1.03135	DOWN
Ce_fissilis.010608.1	13	17993.2	2-Cys peroxiredoxin BAS1-like, chloroplastic	Metabolic process; cellular homeostasis; response to chemical; response to stress	324392	332567	335857	237724	216284	179605	330939	211204	0.00229098	-0.647926	DOWN
Ce_fissilis.009318.1	6	17822.1	Auxin-binding protein ABP19a	Auxin-activated signaling pathway	214138	314948	292660	129871	70266.3	71422.7	273915	90519.9	0.00726137	-1.59742	DOWN
Ce_fissilis.005917.1	7	17782.1	Epidermis-specific secreted glycoprotein EP1	Cell communication; pollination	247161	248452	243448	157720	151258	153686	246354	154221	2.78934e-06	-0.675731	DOWN
Ce_fissilis.015714.1	21	17657.5	Peroxisomal (S)-2-hydroxy-acid oxidase	Metabolic process	219458	193472	206554	90104.3	84623.3	70825	206495	81850.9	0.000190311	-1.33503	DOWN
Ce_fissilis.000071.1	10	17167.8	Ribulose bisphosphate carboxylase small chain, chloroplastic	Photosynthesis; energy metabolism	122663	114751	132978	45274	43757.7	61590.7	123464	50207.4	0.000706877	-1.29812	DOWN
Ce_fissilis.011301.1	15	16399.4	Chlorophyll a-b binding protein CP26, chloroplastic	Generation of precursor metabolites and energy; cellular protein modification process; response to light stimulus; photosynthesis	171970	168026	181533	111187	122061	96307.7	173843	109852	0.00164717	-0.662224	DOWN
Ce_fissilis.007537.1	17	15298	Sedoheptulose-1,7-bisphosphatase, chloroplastic	Carbohydrate metabolic process; energy metabolism; biosynthetic process; cellular process	184892	182493	195942	92188	93770	87406.3	187776	91121.4	2.93354e-05	-1.04315	DOWN
Ce_fissilis.015764.1	5	15171.6	Uncharacterized protein At5g01610	-	200527	205004	213492	157931	112217	125993	206341	132047	0.00615737	-0.643979	DOWN
Ce_fissilis.006734.1	12	14933.8	31 kDa ribonucleoprotein, chloroplastic	-	173775	170033	187351	97330.4	109158	81535.9	177053	96008	0.00106805	-0.882955	DOWN
Ce_fissilis.002484.1	6	14567.9	Tubulin beta-3 chain	Cell cycle; cellular component organization	26267.8	29647.7	30434.4	15518.9	17969.8	15575.2	28783.3	16354.7	0.00119376	-0.815531	DOWN
Ce_fissilis.006082.1	11	14124.5	Tubulin alpha-3 chain	Cellular component organization	61315	66522	67843.3	20072.3	23874.7	19140.1	65226.8	21029	5.67125e-05	-1.63308	DOWN
Ce_fissilis.000411.1	11	13973.5	Ribulose bisphosphate carboxylase small chain, chloroplastic	Energy metabolism; carbohydrate metabolic process; biosynthetic process; photosynthesis	618811	570682	462346	238078	239109	217684	550613	231624	0.00242023	-1.24926	DOWN
Ce_fissilis.013135.1	24	13897.3	NADP-dependent malic enzyme	Metabolic process	208429	201905	171480	72187.3	72468	62768.7	193938	69141.3	0.000455794	-1.48798	DOWN
Ce_fissilis.008156.1	13	13830.4	Glutamine synthetase leaf isozyme, chloroplastic	Biosynthetic process; nitrogen compound metabolic process; cellular process	163821	157590	144231	41995.7	43061	33838.7	155214	39631.8	5.77438e-05	-1.96953	DOWN
Ce_fissilis.017763.1	13	13161.5	L-ascorbate peroxidase, cytosolic	Response to stress; metabolic process; cellular process; response to chemical	240544	235928	207164	144497	168727	127717	227879	146980	0.00693944	-0.632644	DOWN
Ce_fissilis.015459.1	8	12576	Oxygen-evolving enhancer protein 3-2, chloroplastic	Photosynthesis	121063	111805	143100	63051.7	66248.3	57653.3	125323	62317.8	0.00280402	-1.00793	DOWN
Ce_fissilis.013019.1	9	11507.4	Protein of unknown function, DUF642	-	165245	173961	178222	61470.3	71337.3	64425.7	172476	65744.4	2.44121e-05	-1.39146	DOWN
Ce_fissilis.017003.1	15	11365.1	Glucan endo-1,3-beta-glucosidase	Carbohydrate metabolic process	258467	294951	281910	174593	182608	156386	278443	171196	0.0012464	-0.701733	DOWN
Ce_fissilis.001428.1	4	11357.4	Ferredoxin-1, chloroplastic	Generation of precursor metabolites and energy	227418	234959	245533	130594	141501	6794.5	235970	92962.9	0.0303236	-1.34387	DOWN
Ce_fissilis.001903.1	24	10632.2	5-methyltetrahydropteroyltriglutamate--homocysteine methyltransferase 1	Biosynthetic process; nitrogen compound metabolic process; cellular process	188537	164836	105003	47144.9	33826.6	32989.1	152792	37986.9	0.0104782	-2.008	DOWN
Ce_fissilis.005797.1	8	9877.96	Uncharacterized protein At2g37660, chloroplastic	Response to stress; response to external stimulus; response to biotic stimulus	133770	136853	118891	85649	70601.3	86258	129838	80836.1	0.00290288	-0.683638	DOWN
Ce_fissilis.018999.1	3	9799.96	Photosystem I reaction center subunit VI-2, chloroplastic	Photosynthesis	111168	129549	140422	85616	80373.7	69991.7	127047	78660.4	0.00753422	-0.691647	DOWN
Ce_fissilis.016050.2	6	9019.64	Glycine cleavage system H protein, mitochondrial	Catabolic process; cellular process	191819	187427	201974	89564.3	117880	70436	193740	92626.7	0.00218869	-1.06462	DOWN
Ce_fissilis.002280.1	14	8854.28	Formate dehydrogenase, mitochondrial	Catabolic process; cellular process	232452	226121	154244	91776	55518.3	62131.3	204272	69808.6	0.00804963	-1.54902	DOWN
Ce_fissilis.001130.2	10	8803.94	Fructose-bisphosphate aldolase, cytoplasmic isozyme 1	Carbohydrate metabolic process; generation of precursor metabolites and energy; nucleobase-containing compound metabolic process; catabolic process	12305.3	13423.5	14988.1	5579.57	5031.92	4461.79	13572.3	5024.43	0.000530845	-1.43364	DOWN
Ce_fissilis.004112.2	19	8460.35	Guanine nucleotide-binding protein subunit beta-like protein	Translation; cellular protein modification process	96917	78825.7	79102	48689.7	46161.7	52151.3	84948.2	49000.9	0.00448261	-0.793776	DOWN
Ce_fissilis.006726.1	6	7656.51	Ribulose-phosphate 3-epimerase, chloroplastic	Carbohydrate metabolic process	159092	152646	158272	100148	113952	92778.7	156670	102293	0.00113485	-0.615025	DOWN
Ce_fissilis.014689.1	17	7484.85	Monodehydroascorbate reductase, chloroplastic/mitochondrial	Metabolic process	124278	107011	96600.7	33733	30022.7	25878.3	109297	29878	0.00069285	-1.87109	DOWN
Ce_fissilis.003800.3	6	7346.31	Photosystem I reaction center subunit III, chloroplastic	Photosynthesis	157220	127875	134074	10235.7	9453.33	10937.3	139723	10208.8	0.000131999	-3.77469	DOWN
Ce_fissilis.006997.1	10	7300.91	Tubulin beta-1 chain	Cell cycle; cellular component organization	11033.8	10867.9	12309.7	2347.79	1908.63	1490.44	11403.8	1915.62	5.24157e-05	-2.57363	DOWN
Ce_fissilis.012369.1	17	7299.15	Glutamate--glyoxylate aminotransferase 2	Biosynthetic process	76280.7	77356	73797.3	43922	55397.3	46316.3	75811.3	48545.2	0.00171737	-0.643084	DOWN
Ce_fissilis.010810.1	5	7272.73	Auxin-binding protein ABP19a	Auxin-activated signaling pathway	114220	134683	155525	60884	53801.7	40491.7	134809	51725.8	0.00338334	-1.38197	DOWN
Ce_fissilis.015248.1	7	7267.04	Chlorophyll a-b binding protein CP29.2, chloroplastic	Generation of precursor metabolites and energy; cellular protein modification process; response to light stimulus; photosynthesis	192072	205456	167566	59592.7	73987	62800.7	188365	65460.1	0.000499281	-1.52484	DOWN
Ce_fissilis.006118.1	11	7068	Photosystem II CP43 reaction center protein	Generation of precursor metabolites and energy; cellular protein modification process; photosynthesis	186256	182128	190726	44180.7	104300	82330	186370	76936.8	0.00350486	-1.27642	DOWN
Ce_fissilis.000974.1	6	6912.65	Chlorophyll a-b binding protein 13, chloroplastic	Generation of precursor metabolites and energy; cellular protein modification process; response to light stimulus; photosynthesis	85561	78681.3	76312.7	36019.7	46860.3	41846	80185	41575.3	0.000766326	-0.947605	DOWN
Ce_fissilis.012161.1	6	6897.78	NADP-dependent malic enzyme	Metabolic process; cellular process	159169	139569	112157	7085.31	2959.48	4886.89	136965	4977.23	0.00064651	-4.78232	DOWN
Ce_fissilis.002025.1	11	6860.32	NADPH-dependent alkenal/one oxidoreductase, chloroplastic	Metabolic process; cellular process	79368.3	97178.3	101036	24339	24128.7	20065	92527.7	22844.2	0.000516075	-2.01806	DOWN
Ce_fissilis.014532.1	23	6692.28	Pyrophosphate--fructose 6-phosphate 1-phosphotransferase subunit alpha	Carbohydrate metabolic process; generation of precursor metabolites and energy; nucleobase-containing compound metabolic process; catabolic process	141074	132285	102777	38452.3	76863.7	35330	125378	50215.3	0.013138	-1.32009	DOWN
Ce_fissilis.009061.1	4	6649.39	Xyloglucan endotransglucosylase/hydrolase protein 22	Carbohydrate metabolic process; cellular component organization	35592.9	36083.5	41700.4	17392.3	20214.3	20563.5	37792.3	19390	0.00111983	-0.962778	DOWN
Ce_fissilis.014659.1	14	6536.37	Aconitate hydratase, cytoplasmic	-	88260	64775.3	39729.7	19715.7	18860.1	12373.9	64255	16983.2	0.0291476	-1.9197	DOWN
Ce_fissilis.014222.2	25	6526.94	Stromal 70 kDa heat shock-related protein, chloroplastic	Response to stress; response to abiotic stimulus; cellular process; response to chemical	143982	142191	126787	58829.9	63031.8	56523.8	137653	59461.8	0.000172895	-1.211	DOWN
Ce_fissilis.000704.1	9	5838.55	Photosystem II 22 kDa protein, chloroplastic	Photosynthesis	172927	197397	193948	125339	128899	103324	188091	119187	0.00338725	-0.658199	DOWN
Ce_fissilis.016675.1	6	5754.57	Probable UDP-arabinopyranose mutase 2	Cellular process	43010.3	44404.2	40478.2	21331.3	15736.7	15658.2	42630.9	17575.4	0.000340073	-1.27834	DOWN
Ce_fissilis.013669.1	4	5522.44	Zeaxanthin epoxidase, chloroplastic	Abscisic acid biosynthetic process	73453	68468.3	75062	33894	41550.7	38097	72327.8	37847.2	0.000315925	-0.934362	DOWN
Ce_fissilis.000342.1	5	5474.7	MLP-like protein 31	Response to stress	94483.3	101062	100972	58627	28103.7	27070.3	98839.1	37933.7	0.00451268	-1.3816	DOWN
Ce_fissilis.014972.1	12	5199.08	Malate dehydrogenase, glyoxysomal	Carbohydrate metabolic process; generation of precursor metabolites and energy	51796.7	63043.3	60290.8	18370.2	12781.4	14140.3	58376.9	15097.3	0.000332053	-1.95111	DOWN
Ce_fissilis.002212.1	11	5134.99	Trans-resveratrol di-O-methyltransferase	Biosynthetic process; cellular process	76008.3	59033.3	45661.3	17133	16185	14997.3	60234.3	16105.1	0.00742113	-1.90307	DOWN
Ce_fissilis.009200.1	25	5037.21	Phosphoglucomutase, cytoplasmic	Energy metabolism; carbohydrate metabolic process	118333	107845	98248	48750.3	56074.3	52092.3	108142	52305.7	0.000828391	-1.04789	DOWN
Ce_fissilis.011648.1	8	4972.7	Glyceraldehyde-3-phosphate dehydrogenase, cytosolic	Carbohydrate metabolic process	72358.7	48551.4	39142.3	27973.5	22630.3	24281	53350.8	24961.6	0.0470523	-1.0958	DOWN
Ce_fissilis.001261.1	11	4959.3	Elongation factor Tu, mitochondrial	-	56678.3	54296.7	39742.7	29132	26780.7	24193.7	50239.2	26702.1	0.0127096	-0.91186	DOWN
Ce_fissilis.008153.1	3	4822.66	Perakine reductase	-	33738.7	35105.8	29905.1	19258.3	9955.87	12756.3	32916.5	13990.1	0.00392881	-1.2344	DOWN
Ce_fissilis.001101.1	12	4807.91	Phosphoglycolate phosphatase 1B, chloroplastic	Metabolic process; cellular process	72070.3	73200.3	84448.3	34405.7	41213.7	26089.3	76573	33902.9	0.00193164	-1.17543	DOWN
Ce_fissilis.015082.1	9	4792.48	L-ascorbate oxidase homolog	Metabolic process	99431.7	96165.8	93024.8	46569.4	40052.3	41436.9	96207.4	42686.2	3.88428e-05	-1.17238	DOWN
Ce_fissilis.000055.1	13	4773.15	Eukaryotic initiation factor 4A-14	-	107502	109824	93237.8	44942	48035.7	38628.3	103521	43868.7	0.000530799	-1.23867	DOWN
Ce_fissilis.000080.2	16	4725.48	6-phosphogluconate dehydrogenase, decarboxylating 2	Carbohydrate metabolic process; generation of precursor metabolites and energy	33323.3	36738.4	21539.1	13036.1	8824.36	8593.63	30533.6	10151.4	0.0134329	-1.58872	DOWN
Ce_fissilis.016174.1	10	4701.88	3-oxoacyl-[acyl-carrier-protein] synthase I, chloroplastic	Lipid metabolic process; biosynthetic process; cellular process	114983	104362	103555	68550	47076.7	42781.7	107633	52802.8	0.00335149	-1.02744	DOWN
Ce_fissilis.003105.1	7	4531.36	Chlorophyll a-b binding protein CP24 10A, chloroplastic	Generation of precursor metabolites and energy; cellular protein modification process; response to light stimulus; photosynthesis	77088.3	74798.7	70621	38594.3	58062.3	44238.3	74169.3	46965	0.0110683	-0.659237	DOWN
Ce_fissilis.013330.1	16	4507.6	Aconitate hydratase, cytoplasmic	-	42898.8	41994.2	29187.8	21549	24428.9	22293.2	38026.9	22757.1	0.0276497	-0.740707	DOWN
Ce_fissilis.004692.1	4	4473.07	Photosystem I reaction center subunit V, chloroplastic	Photosynthesis	114205	135876	157629	59041.3	31077	42552.3	135903	44223.6	0.00356858	-1.6197	DOWN
Ce_fissilis.008404.1	6	4276	Glutamine synthetase cytosolic isozyme 2	Biosynthetic process; nitrogen compound metabolic process; cellular process	58878.2	48226.8	36324.1	20473.4	17025.6	24834.5	47809.7	20777.9	0.0172392	-1.20226	DOWN
Ce_fissilis.002416.1	8	4143.21	Alcohol dehydrogenase class-3	Generation of precursor metabolites and energy	79538.7	72849.3	72012.3	40955.7	44102.7	46994.3	74800.1	44017.6	0.000477586	-0.764961	DOWN
Ce_fissilis.004767.2	7	4071.97	Major allergen Pru av 1	Cellular protein modification process; signal transduction; response to endogenous stimulus; response to chemical	59995.3	56297.3	54511	15918.3	12006	17848	56934.6	15257.4	6.02139e-05	-1.89979	DOWN
Ce_fissilis.016779.2	8	4025.45	Rhodanese-like domain-containing protein 4, chloroplastic	-	40301.5	47806.8	50351.2	15111.1	17288.7	12849.2	46153.1	15083	0.000690948	-1.61351	DOWN
Ce_fissilis.015713.1	10	4002.97	(S)-2-hydroxy-acid oxidase GLO1	Metabolic process	82104	71303	84126.7	61049.3	44855.7	38041	79177.9	47982	0.0168312	-0.722604	DOWN
Ce_fissilis.012853.1	12	3968.48	5-methyltetrahydropteroyltriglutamate--homocysteine methyltransferase	Biosynthetic process; nitrogen compound metabolic process; cellular process	79322.5	67320.9	35714.5	17870.7	10925.1	10014.9	60786	12936.9	0.0224781	-2.23225	DOWN
Ce_fissilis.001873.1	15	3924.92	Pyrophosphate--fructose 6-phosphate 1-phosphotransferase subunit beta	Carbohydrate metabolic process; generation of precursor metabolites and energy; nucleobase-containing compound metabolic process; catabolic process; photosynthesis; response to chemical	82881.3	76594	67858	18754	15076	10773.3	75777.8	14867.8	0.000246404	-2.34959	DOWN
Ce_fissilis.011703.1	10	3907.99	Serine--glyoxylate aminotransferase	-	90099	86422.7	91405.3	34795.3	34000.3	37864.3	89309	35553.3	9.30096e-06	-1.32882	DOWN
Ce_fissilis.006733.1	4	3808.88	RNA-binding protein CP31B, chloroplastic	Nucleobase-containing compound metabolic process	50455	51592.8	57036.6	23055.6	18238.4	20415	53028.2	20569.6	0.000191405	-1.36624	DOWN
Ce_fissilis.014757.2	12	3790.76	Isocitrate dehydrogenase [NAD] regulatory subunit 1, mitochondrial	Generation of precursor metabolites and energy	53889.1	50324	46732.1	27394.7	24311	25371.8	50315.1	25692.5	0.00039974	-0.969645	DOWN
Ce_fissilis.013329.1	19	3724.28	Aconitate hydratase 1	Generation of precursor metabolites and energy; response to stress; response to external stimulus	49825.6	41338.3	29060.6	16044.8	18855.7	17133.3	40074.8	17344.6	0.0201774	-1.20821	DOWN
Ce_fissilis.005337.1	15	3715.86	Transketolase-2, chloroplastic	Reductive pentose-phosphate cycle; energy metabolism; response to cadmium ion	109750	82245.3	59341.3	26636.3	24930.7	22967.3	83779	24844.8	0.0156857	-1.75365	DOWN
Ce_fissilis.005743.2	4	3660.98	3-hydroxyacyl-[acyl-carrier-protein] dehydratase FabZ	Lipid metabolic process; biosynthetic process; cellular process	58668.3	60279.7	62921.7	34991.7	21460.7	19666	60623.2	25372.8	0.00212411	-1.25659	DOWN
Ce_fissilis.013635.2	10	3579.89	Glutathione hydrolase 1	Catabolic process; cellular process; protein metabolic process	149425	132265	136195	47807.3	66969.3	10597.7	139295	41791.4	0.00492228	-1.73686	DOWN
Ce_fissilis.014335.1	3	3484.51	Ubiquitin-conjugating enzyme E2-17 kDa	Cellular protein modification process; catabolic process	41480.3	51705.3	50991	20045.5	7839.5	7939.5	48058.9	11941.5	0.00229493	-2.00882	DOWN
Ce_fissilis.010530.1	5	3449.17	NADPH-dependent oxidoreductase 2-alkenal reductase	Metabolic process	30288.5	29547.5	33602.7	12690.4	14983.5	18051.3	31146.2	15241.7	0.00133257	-1.03103	DOWN
Ce_fissilis.015887.1	4	3418.95	Ras-related protein RABA2a	-	83568.9	78068.4	81625.5	35771.7	35987	44330	81087.6	38696.2	0.000198292	-1.06729	DOWN
Ce_fissilis.000495.1	4	3393.79	Tryptophan synthase alpha chain, chloroplastic	Biosynthetic process; cellular process	172871	174338	188271	20533	25281.3	16116.3	178493	20643.6	9.26016e-06	-3.11211	DOWN
Ce_fissilis.018593.1	3	3375.23	-	-	58729.7	57435.7	66540.3	19982.5	13320.7	23535.5	60901.9	18946.2	0.000528401	-1.68458	DOWN
Ce_fissilis.000462.1	5	3325.33	Mitochondrial phosphate carrier protein 3, mitochondrial	Transport; response to stress	69072.3	70251.5	74568.1	42073.1	23190.5	25632.2	71297.3	30298.6	0.00264687	-1.2346	DOWN
Ce_fissilis.003765.1	7	3181.72	Bark storage protein A	Nucleobase-containing compound metabolic process	40653.3	36743	36262.3	23104.3	23270.7	22146.3	37886.2	22840.4	0.000466429	-0.730083	DOWN
Ce_fissilis.010887.1	8	3169.69	Aspartyl protease family protein At5g10770	Catabolic process; protein metabolic process	47730.3	45646.7	59407.7	32412	22261	21724.7	50928.2	25465.9	0.00990843	-0.999899	DOWN
Ce_fissilis.001171.1	4	3156.65	Peptide methionine sulfoxide reductase B5	Response to stress; cellular process; protein metabolic process	27220.9	23338.8	25391.9	17253.7	15872.6	15730.4	25317.2	16285.6	0.00178714	-0.636522	DOWN
Ce_fissilis.015257.1	8	3148.14	GDSL esterase/lipase At5g33370	Multicellular organism development	54276.3	52030	59330	18226	18307.7	18942.3	55212.1	18492	7.15673e-05	-1.57808	DOWN
Ce_fissilis.011841.1	4	3113.49	-	-	57126.7	59616.7	71637.7	35565.7	26253.3	40760	62793.7	34193	0.0097717	-0.876918	DOWN
Ce_fissilis.015700.1	10	3062.04	DNA damage-repair/toleration protein DRT100	-	36710.3	40948.3	39152.7	26828.3	26171	22737	38937.1	25245.4	0.00149018	-0.625123	DOWN
Ce_fissilis.015428.1	4	2993.1	Photosystem I reaction center subunit XI, chloroplastic	Photosynthesis	99249	115599	116057	43966.7	42617.7	43393	110302	43325.8	0.000268846	-1.34816	DOWN
Ce_fissilis.011909.1	9	2976	Glutamate-1-semialdehyde 2,1-aminomutase, chloroplastic	Biosynthetic process; cellular process	27201.6	29523.7	31849.8	13432	10319.6	11665.5	29525	11805.7	0.000393372	-1.32245	DOWN
Ce_fissilis.002539.1	6	2903.92	Malate dehydrogenase [NADP], chloroplastic	Carbohydrate metabolic process; generation of precursor metabolites and energy	88560	90912.3	91920.7	50691.7	50352.7	48240.3	90464.3	49761.6	5.41894e-06	-0.862318	DOWN
Ce_fissilis.016304.2	10	2859.11	Probable lactoylglutathione lyase, chloroplastic	-	34710	31815.1	29045.2	16932	22852.1	19059.1	31856.8	19614.4	0.00679021	-0.699686	DOWN
Ce_fissilis.006334.1	5	2857.3	MLP-like protein 423	Cellular protein modification process; response to stress; signal transduction; response to endogenous stimulus; response to chemical	49874	51813.3	54725.3	21206	21845.7	21097	52137.6	21382.9	2.75699e-05	-1.28587	DOWN
Ce_fissilis.005604.1	5	2811.24	Fructose-1,6-bisphosphatase, cytosolic	Carbohydrate metabolic process; cellular process	40584.1	41814.3	42454.4	23204.3	22501.8	20901	41617.6	22202.3	2.44248e-05	-0.906481	DOWN
Ce_fissilis.007803.1	13	2804.76	Sorbitol dehydrogenase	Metabolic process	83406	85592.8	88259	57538.7	58091.7	45438	85752.6	53689.5	0.00182231	-0.675542	DOWN
Ce_fissilis.014865.1	6	2778.56	Probable aldo-keto reductase 1	Metabolic process	19236.7	18980.5	19062.4	2713.76	3190.93	2026.36	19093.2	2643.69	1.17568e-06	-2.85244	DOWN
Ce_fissilis.008930.1	6	2629.06	Formamidase	-	55898.7	48537.7	41032.3	21006.7	20057	23046	48489.6	21369.9	0.00346245	-1.18209	DOWN
Ce_fissilis.011400.1	5	2563.15	Protein MET1, chloroplastic	-	37517	35666.7	31645.3	6651	7797	7666.5	34943	7371.5	9.93075e-05	-2.24497	DOWN
Ce_fissilis.000562.1	8	2490.66	Eukaryotic translation initiation factor 5A	Cellular component organization	47181	51412.7	52879.7	30433.3	36053.3	31224	50491.1	32570.2	0.00185896	-0.632476	DOWN
Ce_fissilis.002030.1	3	2413.33	GTP-binding nuclear protein Ran-3	Transport	48114	37032.3	33357.7	11187	8092.33	7334	39501.3	8871.11	0.00261856	-2.15471	DOWN
Ce_fissilis.007320.1	8	2369.63	Catalase isozyme 3	Response to stress; catabolic process; cellular process; response to chemical	101563	102460	91680	70272.3	47649.3	49070.7	98567.6	55664.1	0.00607323	-0.824365	DOWN
Ce_fissilis.007983.1	9	2317.42	S-adenosylmethionine synthase	Biosynthetic process; cellular process	31762.5	32866.2	21999.5	16715.4	15693.9	13577.9	28876.1	15329.1	0.0192701	-0.913604	DOWN
Ce_fissilis.018860.1	4	2271.26	14-3-3 protein 7	Reproduction; signal transduction; response to external stimulus; post-embryonic development; cellular component organization; cell growth; cell differentiation; response to chemical	13434.3	12415.2	13846	8734.27	8936.35	6897.07	13231.8	8189.23	0.00288849	-0.692214	DOWN
Ce_fissilis.009844.1	9	2258.95	Glutamate dehydrogenase 1	Response to stress; cell communication; metabolic process; nitrogen compound metabolic process; response to external stimulus; response to chemical	42097.3	36002.7	28744	15462	12675.8	12003.2	35614.7	13380.3	0.00513845	-1.41236	DOWN
Ce_fissilis.001892.1	9	2247.37	Glycerate dehydrogenase HPR, peroxisomal	Metabolic process	59268.3	62818.7	76766	41235.7	39182.7	34831.7	66284.3	38416.7	0.00792867	-0.786936	DOWN
Ce_fissilis.008775.1	9	2240.76	ATP synthase gamma chain, chloroplastic	Nucleobase-containing compound metabolic process; transport; biosynthetic process	69687	65949	63791	14774	12669	10031	66475.7	12491.3	1.64266e-05	-2.4119	DOWN
Ce_fissilis.000392.1	3	2229.43	Putative glucose-6-phosphate 1-epimerase	Energy metabolism; carbohydrate metabolic process	46744	49481.3	53667.7	15046	22826	16341.5	49964.3	18071.2	0.000527571	-1.46721	DOWN
Ce_fissilis.002699.1	2	2123	L-ascorbate oxidase homolog	Transport; metabolic process	9981.45	9838.52	11064.5	3415.04	4927.69	5162.07	10294.8	4501.6	0.000986717	-1.19341	DOWN
Ce_fissilis.004527.1	5	2096.26	Monodehydroascorbate reductase	Metabolic process; cellular process; response to chemical	66745.3	49121	38552	19840	16212	6911.5	51472.8	14321.2	0.014955	-1.84566	DOWN
Ce_fissilis.001288.2	8	1987.76	Photosystem II CP47 reaction center protein	Generation of precursor metabolites and energy; cellular protein modification process; photosynthesis	62235.7	45906.3	25971.7	4737	7008	6053.5	44704.6	5932.83	0.0210132	-2.91363	DOWN
Ce_fissilis.015174.1	5	1958.47	Elongation factor 1-gamma	-	57700.7	44414.7	31751.3	10256.3	9852.33	11692.5	44622.2	10600.4	0.0105875	-2.07365	DOWN
Ce_fissilis.016645.1	10	1950.6	30S ribosomal protein S1, chloroplastic	Translation	30344.3	35810.7	41024	22906.7	19895.7	21167.3	35726.3	21323.2	0.0108654	-0.744562	DOWN
Ce_fissilis.016775.1	6	1936.06	Glucose-6-phosphate isomerase, cytosolic	Carbohydrate metabolic process; energy metabolism; generation of precursor metabolites and energy; nucleobase-containing compound metabolic process; response to stress; catabolic process; biosynthetic process; response to external stimulus; response to biotic stimulus; response to chemical	85807	87139	79805	57205	52879	55063.7	84250.3	55049.2	0.000346459	-0.61396	DOWN
Ce_fissilis.001377.2	8	1934.28	NADP-dependent glyceraldehyde-3-phosphate dehydrogenase	Metabolic process	24823.8	19414.1	16443	2730.06	2958.92	2269.01	20227	2652.67	0.00203587	-2.93076	DOWN
Ce_fissilis.017877.1	8	1829.28	Flagellar radial spoke protein 5	-	19212.3	20788.7	20479	13240	8001.33	8236.33	20160	9825.89	0.00433565	-1.03684	DOWN
Ce_fissilis.018886.1	15	1786.9	NAD-dependent malic enzyme 62 kDa isoform, mitochondrial	Metabolic process; cellular process	49167	54479.7	47670.3	36358.7	30115.3	32637.7	50439	33037.2	0.00318732	-0.610447	DOWN
Ce_fissilis.002047.1	8	1773.63	Probable nucleoredoxin 1	Cellular homeostasis	160620	112664	96449.7	47505.3	45138.3	22138	123245	38260.6	0.0152577	-1.6876	DOWN
Ce_fissilis.011024.1	8	1759.94	Succinate dehydrogenase [ubiquinone] flavoprotein subunit 1, mitochondrial	Generation of precursor metabolites and energy	36020.3	33423.3	27025.7	24977.7	22043.3	15880	32156.4	20967	0.0417259	-0.616987	DOWN
Ce_fissilis.001377.3	10	1739.48	NADP-dependent glyceraldehyde-3-phosphate dehydrogenase	Metabolic process	48016.7	42334.6	36310.6	10371.3	12429.7	10923.1	42220.6	11241.4	0.000837396	-1.90913	DOWN
Ce_fissilis.016304.1	7	1688.1	Probable lactoylglutathione lyase, chloroplastic	Metabolic process	26087	23911.3	21829.5	6512.37	8173.24	7848.51	23942.6	7511.37	0.000246732	-1.67243	DOWN
Ce_fissilis.003137.2	7	1668.54	Hydroxyacylglutathione hydrolase cytoplasmic	Catabolic process; cellular process	73768	74549.7	70024	27112.7	21942.3	20265.7	72780.6	23106.9	3.72125e-05	-1.65523	DOWN
Ce_fissilis.010053.1	6	1650.88	Aspartic proteinase nepenthesin-1	Catabolic process; protein metabolic process	48836.7	53583	59305.7	31515	30235.7	25324.3	53908.4	29025	0.00221934	-0.893215	DOWN
Ce_fissilis.000870.2	7	1629.11	HIPL1 protein	-	53508	39437	45014.3	28808.6	31030.7	29752.5	45986.4	29863.9	0.0176443	-0.622803	DOWN
Ce_fissilis.003758.1	8	1598.04	Uncharacterized oxidoreductase At4g09670	Metabolic process	29260.3	27406	26396.3	10990.3	10356.3	11471	27687.6	10939.2	4.87885e-05	-1.33973	DOWN
Ce_fissilis.005604.2	6	1555.37	Fructose-1,6-bisphosphatase, cytosolic	Carbohydrate metabolic process; cellular process	23468.7	25799.7	25664.3	11269.4	11206.5	11914.1	24977.6	11463.3	6.80046e-05	-1.12361	DOWN
Ce_fissilis.010261.1	19	1505.76	Puromycin-sensitive aminopeptidase	-	55551	45817	33214.3	15610	16961.3	16160.3	44860.8	16243.9	0.0115306	-1.46556	DOWN
Ce_fissilis.015354.1	4	1495.84	1-aminocyclopropane-1-carboxylate oxidase	Metabolic process	33181.7	40383.8	45094	14288.7	13196	13075.3	39553.2	13520	0.001717	-1.5487	DOWN
Ce_fissilis.014432.1	5	1476.26	Probable cinnamyl alcohol dehydrogenase 1	Metabolic process	24210.3	22470	22516.3	8874.5	12931	15898	23065.6	12567.8	0.00768214	-0.876004	DOWN
Ce_fissilis.011254.1	8	1476.01	3-oxoacyl-[acyl-carrier-protein] synthase II, chloroplastic	Lipid metabolic process; biosynthetic process; cellular process	35678.3	34615.3	36039	14146.3	15975.7	12495.5	35444.2	14205.8	4.12261e-05	-1.31907	DOWN
Ce_fissilis.000440.1	2	1475.66	Thioredoxin M-type, chloroplastic	Catabolic process; cellular component organization; cellular homeostasis	40726.5	43767	46531.5	12770	16640	14718	43675	14709.3	0.000135971	-1.57008	DOWN
Ce_fissilis.015339.2	3	1472.26	Cytochrome b561 and DOMON domain-containing protein At4g12980	Oxidation-reduction process	46141.3	48520.7	55682	26195.8	27663.2	26641.5	50114.7	26833.5	0.0013062	-0.901197	DOWN
Ce_fissilis.017918.1	3	1452.88	Early nodulin-like protein 1	Generation of precursor metabolites and energy	41972	40584.7	42534	27017.7	33067.3	19274	41696.9	26453	0.0194489	-0.656508	DOWN
Ce_fissilis.011316.1	8	1430.09	Phosphoglucomutase, chloroplastic	Carbohydrate metabolic process; energy metabolism; generation of precursor metabolites and energy; catabolic process; biosynthetic process	29242.7	31967.7	32174.7	10278.7	8796.33	8586.33	31128.3	9220.44	3.5449e-05	-1.75532	DOWN
Ce_fissilis.014480.1	3	1425.47	Peptide methionine sulfoxide reductase	Response to stress; metabolic process; cellular process; response to chemical	29974	33108.7	37920.7	13951.3	14958	20281.3	33667.8	16396.9	0.00469704	-1.03795	DOWN
Ce_fissilis.001617.1	9	1385.09	D-3-phosphoglycerate dehydrogenase 2, chloroplastic	Biosynthetic process; cellular process	32693.1	35876	35212.8	19870.2	22513.7	21132.7	34594	21172.2	0.000405565	-0.708351	DOWN
Ce_fissilis.015098.1	5	1379.61	ATP synthase delta chain, chloroplastic	Generation of precursor metabolites and energy; nucleobase-containing compound metabolic process; transport; response to stress; biosynthetic process; photosynthesis	20425.7	18778.7	23412.3	5613.33	8652.33	8292	20872.2	7519.22	0.00129873	-1.47293	DOWN
Ce_fissilis.008692.1	5	1370.3	Rhodanese-like domain-containing protein 9, chloroplastic	-	18492.3	21131	22769.7	6304	6056	7180.67	20797.7	6513.56	0.000380388	-1.6749	DOWN
Ce_fissilis.012804.1	6	1363.35	Pyruvate kinase, cytosolic isozyme	Carbohydrate metabolic process; generation of precursor metabolites and energy; nucleobase-containing compound metabolic process; catabolic process	15989.7	13464.7	9891.66	7267.82	7841.24	7902.99	13115.3	7670.68	0.0377347	-0.773828	DOWN
Ce_fissilis.008442.1	7	1361.81	T-complex protein 1 subunit delta	Cellular process	48879.7	45328	27429.3	16730.3	14292.3	11363	40545.7	14128.6	0.0179123	-1.52093	DOWN
Ce_fissilis.013403.1	7	1360.83	Calcium sensing receptor, chloroplastic	-	56736.3	62155.7	62132.3	26053.3	31912	27924.7	60341.4	28630	0.000221348	-1.07562	DOWN
Ce_fissilis.006659.1	2	1359.67	Rieske (2Fe-2S) domain-containing protein	Metabolic process	23746.5	25808	25960	9839.5	11593.5	11316.5	25171.5	10916.5	9.19412e-05	-1.20528	DOWN
Ce_fissilis.010661.1	11	1355.93	ATP-dependent zinc metalloprotease FTSH, chloroplastic	Generation of precursor metabolites and energy; catabolic process; response to light stimulus; photosynthesis; cellular component organization; protein metabolic process	34132	36259	31998	10353	8398.33	8250.67	34129.7	9000.67	5.73178e-05	-1.92292	DOWN
Ce_fissilis.000870.1	7	1329.54	HIPL1 protein	-	9808	10310.7	10206.7	2851.62	3475.92	3376.15	10108.5	3234.56	9.90321e-06	-1.64393	DOWN
Ce_fissilis.008180.1	11	1320.01	Glucose-1-phosphate adenylyltransferase large subunit 1	Carbohydrate metabolic process; generation of precursor metabolites and energy; biosynthetic process	38077	41005	41588.7	4165	3416	4763.5	40223.6	4114.83	6.22194e-06	-3.28913	DOWN
Ce_fissilis.013279.1	5	1317.22	Probable aquaporin PIP1-2	Transport	35329.3	35336.7	44614	13019.3	17390.7	13424.7	38426.7	14611.6	0.00217111	-1.395	DOWN
Ce_fissilis.013568.1	14	1312.96	Alpha-glucosidase	Carbohydrate metabolic process	48180	45045.7	41062	20027.7	18578.3	16733	44762.6	18446.3	0.000316102	-1.27896	DOWN
Ce_fissilis.009026.1	7	1281.16	Long chain acyl-CoA synthetase 7, peroxisomal	Lipid metabolic process; response to stress; cellular process; response to chemical	37692	35127	28608	19468.7	10021.3	5928.33	33809	11806.1	0.0104181	-1.51787	DOWN
Ce_fissilis.006965.1	3	1250.55	Proteasome subunit alpha type-7-B	Catabolic process; cellular process; protein metabolic process	19967	22992.1	15378	12918.4	7364.39	7548.88	19445.7	9277.21	0.0238536	-1.06769	DOWN
Ce_fissilis.016194.1	5	1208.35	Succinate-semialdehyde dehydrogenase (acetylating)	Metabolic process; response to chemical	36367	30329.3	23224	16190	15253	16278.7	29973.4	15907.2	0.0210257	-0.914003	DOWN
Ce_fissilis.009686.1	2	1189.53	Chlorophyll a-b binding protein, chloroplastic	Generation of precursor metabolites and energy; cellular protein modification process; response to light stimulus; photosynthesis	38918	34879.5	43444.5	4425	9532	7018	39080.7	6991.67	0.000369179	-2.48275	DOWN
Ce_fissilis.014129.2	6	1175.7	3-oxo-Delta(4,5)-steroid 5-beta-reductase	Metabolic process	25962.1	23301.1	17564.4	5225	4300.18	4102.04	22275.9	4542.41	0.00209165	-2.29395	DOWN
Ce_fissilis.007876.3	2	1164.68	Protein SUPPRESSOR OF QUENCHING 1, chloroplastic	Cellular homeostasis	28350.5	32652	30495	14132.5	18523.5	16010.5	30499.2	16222.2	0.00130417	-0.910803	DOWN
Ce_fissilis.014130.1	8	1151.91	Protein transport protein SEC23	Transport; cellular component organization	41362.7	42457	39058	22745	24710	15874	40959.2	21109.7	0.00226279	-0.956285	DOWN
Ce_fissilis.001633.1	8	1142.94	Glycerol kinase	Carbohydrate metabolic process	71804.3	61399.7	54984.7	27865	22501.3	21005.3	62729.6	23790.6	0.00186016	-1.39876	DOWN
Ce_fissilis.009303.1	4	1128.66	Probable cinnamyl alcohol dehydrogenase 9	Metabolic process	31769.3	26451	24583	4827.33	5478	7811	27601.1	6038.78	0.000765059	-2.1924	DOWN
Ce_fissilis.019092.1	7	1120.88	Probable mitochondrial-processing peptidase subunit beta, mitochondrial	Protein metabolic process	35997.3	31230.3	20624.3	6213.33	6268.5	6504.5	29284	6328.78	0.00722287	-2.21011	DOWN
Ce_fissilis.011248.1	2	1087.2	Probable ribose-5-phosphate isomerase 3, chloroplastic	Generation of precursor metabolites and energy	25172	28310.5	37444	18320.5	11846	19460	30308.8	16542.2	0.0347058	-0.87359	DOWN
Ce_fissilis.000319.1	9	1071.09	Serine/threonine-protein phosphatase 2A 65 kDa regulatory subunit A beta isoform	-	19268.9	16859.2	19083.4	7057.8	8003.06	6746.98	18403.8	7269.28	0.000206602	-1.34012	DOWN
Ce_fissilis.001088.1	6	1065.02	D-3-phosphoglycerate dehydrogenase 3, chloroplastic	Biosynthetic process; cellular process	9757.71	10447.4	10662.5	3005.16	3705.66	3013.02	10289.2	3241.28	3.94076e-05	-1.6665	DOWN
Ce_fissilis.010335.1	5	1064.81	NAD-dependent malic enzyme 59 kDa isoform, mitochondrial	Metabolic process; cellular process	34969	32937.3	24591.7	17685.7	12263.7	14386.3	30832.7	14778.6	0.0105922	-1.06095	DOWN
Ce_fissilis.011383.1	6	1045.94	Protein HOTHEAD	Metabolic process	36304.3	40213.7	43534.3	16611.3	19889.3	17909.3	40017.4	18136.7	0.000677565	-1.14172	DOWN
Ce_fissilis.011778.1	6	1031.34	Cytochrome c1-1, heme protein, mitochondrial	Generation of precursor metabolites and energy; nucleobase-containing compound metabolic process; transport; biosynthetic process	17610.7	18378	14860	8509.33	7880	7879	16949.6	8089.44	0.00123919	-1.06713	DOWN
Ce_fissilis.005519.1	9	1018.5	T-complex protein 1 subunit eta	Cellular process; response to chemical	21840.3	21735.3	19536	12455.7	12604	12350.3	21037.2	12470	0.000343567	-0.754483	DOWN
Ce_fissilis.015795.1	2	1009.37	Fruit protein pKIWI502	Metabolic process	18189	22686	19633	10975.5	6524	6454	20169.3	7984.5	0.00366079	-1.33689	DOWN
Ce_fissilis.016593.1	3	1004.87	Patellin-5	-	20882.3	15338	10078.5	6672.67	6610.67	6890	15432.9	6724.44	0.0492663	-1.19853	DOWN
Ce_fissilis.002433.1	11	985.799	Tol-Pal system protein TolB	Nucleobase-containing compound metabolic process; protein metabolic process	34272.7	30453.7	27313.3	20328.7	21167.7	19120.3	30679.9	20205.6	0.00753105	-0.602541	DOWN
Ce_fissilis.018123.1	3	952.533	ATP synthase subunit gamma, mitochondrial	Nucleobase-containing compound metabolic process; transport; biosynthetic process	22847.3	17099	17795.7	7348	6678.67	8677.5	19247.3	7568.06	0.00358044	-1.34666	DOWN
Ce_fissilis.005225.2	2	947.926	Metallo-hydrolase/oxidoreductase superfamily protein	-	24506.5	25345.5	27281	10500.5	12583.5	15988	25711	13024	0.00212738	-0.981213	DOWN
Ce_fissilis.009294.1	3	940.682	Ferritin-3, chloroplastic	Transport; response to stress; multicellular organism development; response to external stimulus; response to biotic stimulus; response to abiotic stimulus; photosynthesis; cellular homeostasis; response to chemical	30299	30248	23799.7	19652	21921	13787.7	28115.6	18453.6	0.0408315	-0.60747	DOWN
Ce_fissilis.000738.2	3	936.056	Plasma membrane-associated cation-binding protein 1	-	21187.6	18948.9	14490.2	2299.82	3181.97	2574.97	18208.9	2685.59	0.00144494	-2.76133	DOWN
Ce_fissilis.009003.1	3	921.834	Argininosuccinate synthase, chloroplastic	Biosynthetic process; cellular process	25323.3	22724.3	14556.3	8499.33	7385	5502	20868	7128.78	0.0149815	-1.54957	DOWN
Ce_fissilis.002776.1	4	890.291	Ribose-phosphate pyrophosphokinase 4	Nucleobase-containing compound metabolic process; biosynthetic process	25487.3	23478.7	21465	19694.5	11601	13253.7	23477	14849.7	0.0341153	-0.660812	DOWN
Ce_fissilis.003143.1	3	835.333	Fasciclin-like arabinogalactan protein 2	Biological_process	31373	34236.3	34112	18224.7	12371.7	19544.5	33240.4	16713.6	0.00230929	-0.991916	DOWN
Ce_fissilis.006652.1	7	802.179	2-hydroxyacyl-CoA lyase	Lipid metabolic process; catabolic process; cellular process	91354.3	76842.7	63268.3	30456.7	37470	38276	77155.1	35400.9	0.00791044	-1.12398	DOWN
Ce_fissilis.006965.2	3	791.59	Proteasome subunit alpha type-7	Catabolic process; cellular process; protein metabolic process	10150.6	11783.9	8560.01	4798.96	2273.42	3234.79	10164.9	3435.72	0.00476811	-1.5649	DOWN
Ce_fissilis.011818.1	2	790.394	Thaumatin-like protein 1	-	23256	17921.5	23897	5485	6338	6451	21691.5	6091.33	0.00124414	-1.8323	DOWN
Ce_fissilis.012926.1	3	784.195	Glyoxylate/succinic semialdehyde reductase 2, chloroplastic	Metabolic process	16721.3	16708.3	19405.7	10760.7	9848	8702.67	17611.8	9770.44	0.00188818	-0.850044	DOWN
Ce_fissilis.015758.1	3	781.522	Guanosine nucleotide diphosphate dissociation inhibitor 1	Transport; signal transduction	20621.3	16052	14200.3	7781	9086.5	7929	16957.9	8265.5	0.011225	-1.03678	DOWN
Ce_fissilis.013842.1	2	737.615	Red chlorophyll catabolite reductase, chloroplastic	Catabolic process; cellular process	17342	21634.5	25062	16691	12090.5	10234.5	21346.2	13005.3	0.047219	-0.714874	DOWN
Ce_fissilis.001841.2	2	730.274	Beta-hexosaminidase 2	Carbohydrate metabolic process	32674	36530	37102.5	8155	5488.5	5202	35435.5	6281.83	6.45155e-05	-2.49594	DOWN
Ce_fissilis.008596.1	7	728.151	Uncharacterized protein At5g02240	Cellular component organization	18675.3	17486.3	17027.7	2435	2703.5	5116	17729.8	3418.17	0.000129819	-2.37488	DOWN
Ce_fissilis.017503.1	3	721.947	Pathogen-related protein	-	12838	13022	13047	7237.67	7555.5	7555.5	12969	7449.56	1.56127e-06	-0.799841	DOWN
Ce_fissilis.005581.1	4	705.692	UDP-glycosyltransferase 74F2	-	26060	20505.7	21469.7	6338.67	4851.5	6588	22678.4	5926.06	0.000737301	-1.93618	DOWN
Ce_fissilis.015895.1	2	683.917	Uncharacterized protein ycf39	-	22864.5	23920.5	25249	11118	13446.5	12974.5	24011.3	12513	0.000314577	-0.940288	DOWN
Ce_fissilis.014909.1	6	670.146	Delta-aminolevulinic acid dehydratase 1, chloroplastic	Biosynthetic process; cellular process	32847.3	40794.7	33204	20570	21488.7	8548.67	35615.3	16869.1	0.018794	-1.07811	DOWN
Ce_fissilis.014409.1	5	644.448	Serine carboxypeptidase-like 50	Protein metabolic process	21090.3	22068.3	23457	18630.7	9646.67	12257.3	22205.2	13511.6	0.0343338	-0.716705	DOWN
Ce_fissilis.018077.1	3	631.691	4-coumarate--CoA ligase-like 5	-	18549.3	15426.7	12689.7	6100.33	7179.67	6358.67	15555.2	6546.22	0.00639942	-1.24866	DOWN
Ce_fissilis.012940.1	5	630.188	NADH dehydrogenase [ubiquinone] 1 alpha subcomplex subunit 9, mitochondrial	Biosynthetic process; cellular process	24105.3	28514.7	37459	19562.7	11861	12134	30026.3	14519.2	0.029337	-1.04826	DOWN
Ce_fissilis.009048.1	3	622.782	ATP-dependent zinc metalloprotease FTSH 2, chloroplastic	Generation of precursor metabolites and energy; catabolic process; response to light stimulus; photosynthesis; cellular component organization; protein metabolic process	63626.5	58440.4	37494.7	15060.6	11464.4	9740.22	53187.2	12088.4	0.00723656	-2.13745	DOWN
Ce_fissilis.008641.1	3	616.741	Glutathione reductase, chloroplastic	Generation of precursor metabolites and energy; cellular homeostasis; response to chemical	34844.3	31205	30732	15186.3	15307	11646	32260.4	14046.4	0.000501941	-1.19956	DOWN
Ce_fissilis.012347.1	4	610.348	Proteasome subunit beta type-4	Catabolic process; cellular process; protein metabolic process	17645.7	15667.7	14142.3	4889	9526.33	11576.7	15818.6	8664	0.0323261	-0.868513	DOWN
Ce_fissilis.008109.1	2	601.643	Alpha-galactosidase	Carbohydrate metabolic process	36035.2	30899.5	32921.7	20663.9	19566.6	24692.2	33285.4	21640.9	0.00571184	-0.62113	DOWN
Ce_fissilis.013858.1	6	555.819	Bifunctional aspartokinase/homoserine dehydrogenase 2, chloroplastic	Biosynthetic process	21939	16855.7	15156	10916.7	12257	6704	17983.6	9959.22	0.0382673	-0.852573	DOWN
Ce_fissilis.016211.2	2	552.704	Flavone 3'-O-methyltransferase 1	Metabolic process	17651.5	16403	15026.5	9885	8082.5	7769	16360.3	8578.83	0.001497	-0.931349	DOWN
Ce_fissilis.017998.1	4	533.027	Probable endo-1,3(4)-beta-glucanase ARB_01444	-	17145.7	17295.3	17458	8465.5	9068.5	8184.5	17299.7	8572.83	5.95676e-06	-1.0129	DOWN
Ce_fissilis.013173.1	2	482.07	Pyruvate kinase isozyme A, chloroplastic	Carbohydrate metabolic process; generation of precursor metabolites and energy; nucleobase-containing compound metabolic process; catabolic process	11836	9501.5	8055.5	5444	5015	5353	9797.67	5270.67	0.0150749	-0.894453	DOWN
Ce_fissilis.014384.1	2	462.061	Clavaminate synthase-like protein At3g21360	Metabolic process	5257	5687	6320.5	2086.5	2274.5	2474	5754.83	2278.33	0.000451194	-1.3368	DOWN
Ce_fissilis.013775.1	2	455.855	Galactokinase	Carbohydrate metabolic process	35354	29179	28163	12967.5	12933	12750	30898.7	12883.5	0.00131499	-1.26202	DOWN
Ce_fissilis.007062.1	2	383.338	Prostaglandin reductase-3	Metabolic process	19890.5	17622	15267	8556	9586	5451.5	17593.2	7864.5	0.0059462	-1.16159	DOWN
Ce_fissilis.004594.1	2	381.572	Chloroplastic lipocalin	-	24193.5	25739	30237.5	18601	16463	11002	26723.3	15355.3	0.0172314	-0.79936	DOWN
Ce_fissilis.000916.1	2	372.941	Thylakoid lumenal 29 kDa protein, chloroplastic	Response to stress; catabolic process; cellular process; response to chemical	17014.5	17391.5	16759.5	9449	11035	9638.5	17055.2	10040.8	0.000192159	-0.76433	DOWN
Ce_fissilis.001602.1	3	367.326	Leucine aminopeptidase	Protein metabolic process	17031.7	17082	15824.7	8591.33	7385.67	8290	16646.1	8089	9.81105e-05	-1.04115	DOWN
Ce_fissilis.016159.1	5	352.522	Acylamino-acid-releasing enzyme	Cellular component organization; protein metabolic process	37446.3	46421	24600.3	13835.3	14091	14360.3	36155.9	14095.6	0.0252848	-1.35899	DOWN
Ce_fissilis.014397.1	2	316.55	Trans-resveratrol di-O-methyltransferase	Metabolic process	23912.5	24038.5	22564.5	9961.5	8875	6999.5	23505.2	8612	0.000111693	-1.44856	DOWN
Ce_fissilis.007385.1	2	314.987	Acetyl-coenzyme A synthetase, chloroplastic/glyoxysomal	Nucleobase-containing compound metabolic process; biosynthetic process	14562.5	11342	12346	5588	6983	6792	12750.2	6454.33	0.0038488	-0.982176	DOWN
Ce_fissilis.009377.1	17	20874.5	ATP synthase subunit beta, mitochondrial	Nucleobase-containing compound metabolic process; transport; biosynthetic process	8511.07	9136.62	8188.51				8612.06	0	-	-	Unique S1
Ce_fissilis.002760.1	7	4546.71	Eukaryotic initiation factor 4A-15	-	12542.9	15118.9	12835.6				13499.1	0	-	-	Unique S1
Ce_fissilis.010582.1	4	3473.39	Ras-related protein RABA1f	Transport; signal transduction	3943.46	1518.16	1772.24				2411.29	0	-	-	Unique S1
Ce_fissilis.001393.2	5	3023.18	Ras-related protein Rab7	Transport; signal transduction	9599.92	9236.59	10779.5				9871.99	0	-	-	Unique S1
Ce_fissilis.015325.1	4	1672.52	MLP-like protein 34	Defense response	15658.8	14936.2	10506.6				13700.6	0	-	-	Unique S1
Ce_fissilis.013494.1	3	1281.98	Glucose-1-phosphate adenylyltransferase small subunit 2, chloroplastic	Carbohydrate metabolic process; generation of precursor metabolites and energy; biosynthetic process	44921	35923	27424				36089.3	0	-	-	Unique S1
Ce_fissilis.007855.1	4	1265.99	Serine/threonine-protein phosphatase PP2A catalytic subunit	Cellular protein modification process	18883.4	19998.6	20009.4				19630.5	0	-	-	Unique S1
Ce_fissilis.013260.1	3	1253.48	1-aminocyclopropane-1-carboxylate oxidase	Metabolic process	11285.2	13488.8	14062.4				12945.5	0	-	-	Unique S1
Ce_fissilis.001377.1	5	1210.6	NADP-dependent glyceraldehyde-3-phosphate dehydrogenase	Metabolic process	10663.6	7948.81	7562.77				8725.05	0	-	-	Unique S1
Ce_fissilis.000324.1	4	975.558	Protochlorophyllide reductase, chloroplastic	Biosynthetic process; photosynthesis	7332.44	7123.3	4943.95				6466.56	0	-	-	Unique S1
Ce_fissilis.015533.1	8	909.796	Granule-bound starch synthase 1, chloroplastic/amyloplastic	Carbohydrate metabolic process; biosynthetic process; cellular process	28369.5	25921.9	21338.2				25209.9	0	-	-	Unique S1
Ce_fissilis.001089.1	3	465.977	Granule-bound starch synthase 1, chloroplastic/amyloplastic	Carbohydrate metabolic process; biosynthetic process; cellular process	9535.6	8858.94	7952.9				8782.48	0	-	-	Unique S1
Ce_fissilis.013799.1	2	437.884	Major allergen Pru ar 1	Cellular protein modification process; response to stress; signal transduction; response to endogenous stimulus; response to chemical	11608	11605	13025.5				12079.5	0	-	-	Unique S1
Ce_fissilis.014048.1	2	405.249	Elongation factor G-2, chloroplastic	Cellular component organization	7804	2995	1887				4228.67	0	-	-	Unique S1
Ce_fissilis.001285.1	2	382.275	Protoporphyrinogen oxidase 1, chloroplastic	Biosynthetic process; cellular process	18159.5	15891.5	19461				17837.3	0	-	-	Unique S1
Ce_fissilis.003786.1	10	97629.2	Major allergen Pru ar 1	Cellular process	736084	725325	648291	759222	769990	679533	703233	736248	0.452659	0.0661892	UNCHANGED
Ce_fissilis.006015.1	8	69983.1	Germin-like protein subfamily 1 member 14	-	385800	396690	406225	996467	755877	534546	396238	762297	0.0518137	0.943985	UNCHANGED
Ce_fissilis.014428.1	28	63179.5	Actin-7	-	516710	511748	505074	427465	416619	360717	511178	401600	0.00638503	-0.348066	UNCHANGED
Ce_fissilis.002071.1	28	61425.2	Perakine reductase	Metabolic process	717334	611835	549719	435230	447279	414156	626296	432222	0.0176689	-0.535073	UNCHANGED
Ce_fissilis.014996.1	29	59490.1	Tubulin beta-8 chain	Cell cycle; cellular component organization	126290	129476	130519	92034.1	102543	93096.3	128762	95891.1	0.00077639	-0.425237	UNCHANGED
Ce_fissilis.012078.2	25	54324.7	Actin-97	-	41177.8	42118.3	40955.9	47152.2	53955.5	56094.6	41417.3	52400.7	0.0156178	0.339353	UNCHANGED
Ce_fissilis.003787.1	11	54019.8	Major allergen Pru av 1	Cellular protein modification process; response to stress; signal transduction; response to endogenous stimulus; response to chemical	282619	292277	286938	424960	461122	364971	287278	417017	0.00999847	0.537659	UNCHANGED
Ce_fissilis.004456.1	9	53717.4	Universal stress protein PHOS32	-	228715	234653	247261	202649	180255	150700	236876	177868	0.0210843	-0.413325	UNCHANGED
Ce_fissilis.013959.2	25	52554.2	Tubulin beta-4 chain	Cell cycle; cellular component organization	75482.2	79750.9	80938.3	58990.7	79964.6	156167	78723.8	98374	0.542705	0.321478	UNCHANGED
Ce_fissilis.015095.1	5	51532	Peroxidase 15	Response to stress; catabolic process; cellular process; response to chemical	494151	550751	528119	614074	543447	397966	524340	518496	0.933402	-0.0161716	UNCHANGED
Ce_fissilis.015306.1	23	47013.5	Basic 7S globulin	Catabolic process; protein metabolic process	457878	430788	414742	466958	443597	448586	434469	453047	0.268045	0.0604057	UNCHANGED
Ce_fissilis.017405.1	17	45492.9	Peroxidase 12	Response to stress; catabolic process; cellular process; response to chemical	290276	291687	321781	382167	398286	385740	301248	388731	0.001539	0.367819	UNCHANGED
Ce_fissilis.016689.1	28	44264	Tubulin beta-2 chain	Cell cycle; cellular component organization	27970.4	30080.1	30362.8	28936.8	32634.7	27712.7	29471.1	29761.4	0.869729	0.0141424	UNCHANGED
Ce_fissilis.004609.1	14	43199.3	Oxygen-evolving enhancer protein 2, chloroplastic	Photosynthesis	491324	514538	513734	347837	389325	349968	506532	362376	0.000741084	-0.483163	UNCHANGED
Ce_fissilis.013923.1	7	42793.4	Peroxidase 15	Response to stress; catabolic process; cellular process; response to chemical	463671	470639	493033	700188	565709	626814	475781	630903	0.0176813	0.407121	UNCHANGED
Ce_fissilis.005614.1	20	41262.2	Oxygen-evolving enhancer protein 1, chloroplastic	Generation of precursor metabolites and energy; photosynthesis; cellular component organization	650137	649426	641491	441599	484253	410611	647018	445488	0.000725038	-0.53842	UNCHANGED
Ce_fissilis.017405.2	13	39814	Peroxidase 12	Response to stress; catabolic process; cellular process; response to chemical	330089	345973	372722	442056	451840	389517	349594	427805	0.0272821	0.29127	UNCHANGED
Ce_fissilis.015704.1	11	39191.9	Chlorophyll a-b binding protein 21, chloroplastic	Generation of precursor metabolites and energy; cellular protein modification process; photosynthesis	389643	361690	391065	321839	412268	387732	380799	373946	0.822673	-0.0261988	UNCHANGED
Ce_fissilis.015536.1	14	38547.4	Malate dehydrogenase, mitochondrial	Carbohydrate metabolic process; generation of precursor metabolites and energy	309037	335196	334130	401387	429570	355438	326121	395465	0.0405504	0.278143	UNCHANGED
Ce_fissilis.013557.1	23	36103.3	Fructose-bisphosphate aldolase 6, cytosolic	Carbohydrate metabolic process; generation of precursor metabolites and energy; nucleobase-containing compound metabolic process; catabolic process	477711	495465	503548	550436	559376	552547	492241	554119	0.00157254	0.170832	UNCHANGED
Ce_fissilis.016597.2	33	34380.2	Probable L-gulonolactone oxidase 6	Metabolic process	693076	552338	483481	402375	411213	399216	576299	404268	0.049595	-0.511505	UNCHANGED
Ce_fissilis.017401.1	19	33153.8	Tubulin beta-6 chain	Cellular component organization	163440	171236	176864	146089	161860	135409	170513	147786	0.0576423	-0.206376	UNCHANGED
Ce_fissilis.016865.1	29	33078.2	ATP synthase subunit beta, mitochondrial	Nucleobase-containing compound metabolic process; transport; biosynthetic process	469188	509190	457527	441157	436030	379982	478635	419056	0.076301	-0.191781	UNCHANGED
Ce_fissilis.014854.1	26	32680.4	Enolase	Carbohydrate metabolic process; generation of precursor metabolites and energy; nucleobase-containing compound metabolic process; catabolic process	362897	362200	355435	346502	370695	333073	360177	350090	0.421035	-0.0409825	UNCHANGED
Ce_fissilis.009112.1	17	32227.4	Malate dehydrogenase	Carbohydrate metabolic process; generation of precursor metabolites and energy	425408	451379	446598	408706	451151	398988	441128	419615	0.295557	-0.0721328	UNCHANGED
Ce_fissilis.014995.2	22	32116.6	Tubulin beta-1 chain	Cell cycle; cellular component organization	23185.3	23303.9	23612.9	26812	30896	26366.3	23367.4	28024.7	0.0323221	0.262207	UNCHANGED
Ce_fissilis.006085.3	19	31835.5	Tubulin alpha chain	Cellular component organization	276047	274836	282525	194348	222999	144177	277803	187175	0.0173436	-0.569674	UNCHANGED
Ce_fissilis.002854.1	12	31708.7	Thaumatin-like protein	-	254062	278485	289357	267789	266664	246085	273968	260179	0.335183	-0.0744993	UNCHANGED
Ce_fissilis.018100.2	18	26807.3	Basic 7S globulin	Catabolic process; protein metabolic process	338765	372772	437745	490472	584894	394639	383094	490002	0.160389	0.355089	UNCHANGED
Ce_fissilis.008983.1	12	26516.9	Triosephosphate isomerase, cytosolic	Carbohydrate metabolic process; generation of precursor metabolites and energy; nucleobase-containing compound metabolic process; catabolic process; biosynthetic process	264609	238457	244778	181889	165482	182097	249281	176489	0.00162885	-0.498195	UNCHANGED
Ce_fissilis.019019.1	9	24743.2	Alcohol dehydrogenase class-P	Metabolic process	169182	208684	189115	293711	271897	240472	188994	268693	0.0142593	0.507622	UNCHANGED
Ce_fissilis.006083.1	8	24695.4	Tubulin alpha-3 chain	Cellular component organization	107047	104501	107139	80653.3	105750	92194.3	106229	92865.8	0.14129	-0.193958	UNCHANGED
Ce_fissilis.002415.1	20	24336.5	Alcohol dehydrogenase	Catabolic process; cellular process; response to chemical	209112	237081	211739	278864	279519	257417	219311	271934	0.0102133	0.310278	UNCHANGED
Ce_fissilis.009802.1	10	23195.1	Chlorophyll a-b binding protein 151, chloroplastic	Generation of precursor metabolites and energy; cellular protein modification process; response to light stimulus; photosynthesis	228626	216589	218204	170819	217199	201305	221140	196441	0.155188	-0.17086	UNCHANGED
Ce_fissilis.014429.1	15	22861.4	Actin	-	69967.1	73140.6	69974.4	67738	73419.8	74872.4	71027.4	72010.1	0.705434	0.0198238	UNCHANGED
Ce_fissilis.008984.1	15	22589.5	Triosephosphate isomerase, cytosolic	Carbohydrate metabolic process; generation of precursor metabolites and energy; nucleobase-containing compound metabolic process; catabolic process; response to chemical	255903	266216	244756	226855	225915	255400	255625	236057	0.163753	-0.114896	UNCHANGED
Ce_fissilis.004298.1	20	21627.5	(+)-neomenthol dehydrogenase	Metabolic process	247061	253617	284536	234506	175913	161601	261738	190673	0.0473826	-0.457019	UNCHANGED
Ce_fissilis.004456.2	4	21477	Universal stress protein PHOS32	Response to stress; response to abiotic stimulus	157602	128866	169728	147954	107690	118160	152065	124601	0.183458	-0.287368	UNCHANGED
Ce_fissilis.006084.1	15	21309.2	Tubulin alpha chain	Cellular component organization	167339	184737	187036	189931	227323	179778	179704	199010	0.287166	0.147221	UNCHANGED
Ce_fissilis.015325.2	11	20644.5	MLP-like protein 31	Response to stress	165837	163066	169583	151320	154511	140455	166162	148762	0.0201551	-0.159579	UNCHANGED
Ce_fissilis.013782.2	12	19473	Epidermis-specific secreted glycoprotein EP1	Cell communication; pollination	299111	273360	258082	361372	402674	330657	276851	364901	0.0215729	0.398396	UNCHANGED
Ce_fissilis.005132.1	15	19176.5	Triosephosphate isomerase, chloroplastic	Carbohydrate metabolic process; generation of precursor metabolites and energy; nucleobase-containing compound metabolic process; catabolic process	150667	164124	180323	144164	144071	136678	165038	141638	0.0586807	-0.220591	UNCHANGED
Ce_fissilis.009261.1	16	19117.4	Cysteine synthase	Biosynthetic process; cellular process	157078	155190	175396	194648	202017	185802	162555	194156	0.016597	0.256288	UNCHANGED
Ce_fissilis.014515.1	26	18086.5	ATP synthase subunit alpha, mitochondrial	Nucleobase-containing compound metabolic process; transport; response to stress; biosynthetic process; response to external stimulus; response to biotic stimulus; response to abiotic stimulus	287585	294741	314489	289642	317853	285336	298938	297610	0.923498	-0.00642221	UNCHANGED
Ce_fissilis.015096.1	6	18004.9	Peroxidase 15	Response to stress; catabolic process; cellular process; response to chemical	263138	282403	282378	398338	381289	322445	275973	367357	0.0186391	0.412656	UNCHANGED
Ce_fissilis.006840.1	13	17075	Tubulin beta-1 chain	Cell cycle; cellular component organization	41046.3	43605.5	44793.8	35303.2	39816.3	32349.1	43148.5	35822.9	0.0396826	-0.26843	UNCHANGED
Ce_fissilis.011648.2	13	16902.4	Glyceraldehyde-3-phosphate dehydrogenase GAPC1, cytosolic	Carbohydrate metabolic process; generation of precursor metabolites and energy; nucleobase-containing compound metabolic process; catabolic process	118824	100493	86102.6	83118.1	66419.4	70068.7	101806	73202.1	0.0561938	-0.475872	UNCHANGED
Ce_fissilis.018837.2	11	16710.9	Peptidyl-prolyl cis-trans isomerase	Cellular protein modification process	265644	308028	296674	229877	200173	190732	290115	206927	0.00860729	-0.487504	UNCHANGED
Ce_fissilis.004249.1	11	16177.2	Reactive Intermediate Deaminase A, chloroplastic	-	216181	204283	168550	198084	205027	200981	196338	201364	0.745568	0.0364655	UNCHANGED
Ce_fissilis.005602.1	12	15942.2	Beta carbonic anhydrase 4	Catabolic process; cellular process	142892	141906	136121	120238	128416	113954	140306	120869	0.0143174	-0.215135	UNCHANGED
Ce_fissilis.010564.1	24	15448	V-type proton ATPase subunit B2	Transport; metabolic process	198227	208787	223860	165114	184467	150895	210291	166825	0.023814	-0.334053	UNCHANGED
Ce_fissilis.018100.1	13	15389.2	Basic 7S globulin	Catabolic process; protein metabolic process	237669	240231	275048	345258	377940	358874	250983	360691	0.00202022	0.523172	UNCHANGED
Ce_fissilis.008713.1	29	15091.5	Leucine aminopeptidase 2, chloroplastic	Protein metabolic process	188446	192233	199952	182764	232972	215534	193544	210423	0.326285	0.120634	UNCHANGED
Ce_fissilis.008811.1	13	14596	Esterase	Metabolic process	454121	434702	412049	350761	303631	312630	433624	322341	0.00414398	-0.427859	UNCHANGED
Ce_fissilis.009132.1	12	14301.8	Isoflavone reductase homolog PCBER	Biosynthetic process; cellular process; secondary metabolic process; response to chemical	161093	156929	173491	141553	145442	105295	163838	130763	0.0734633	-0.325307	UNCHANGED
Ce_fissilis.017826.2	13	14251	Quinone oxidoreductase	Metabolic process	165335	148361	159310	138971	160997	150349	157669	150106	0.401745	-0.0709147	UNCHANGED
Ce_fissilis.001741.1	15	14207	Probable cysteine protease RD21B	Response to stress; catabolic process; response to external stimulus; response to biotic stimulus; cellular process; protein metabolic process	197556	204248	208054	274912	286227	250813	203286	270651	0.00346389	0.41292	UNCHANGED
Ce_fissilis.014356.1	9	14117	Translationally-controlled tumor protein homolog	-	241553	265651	304563	251683	248233	222438	270589	240785	0.220481	-0.168361	UNCHANGED
Ce_fissilis.010974.1	15	14070	20 kDa chaperonin, chloroplastic	Response to stress; signal transduction; metabolic process; response to abiotic stimulus; response to endogenous stimulus; cellular component organization; response to chemical; regulation of molecular function	250524	259191	269841	219847	217395	186183	259852	207808	0.0129606	-0.322437	UNCHANGED
Ce_fissilis.005977.1	18	14011.8	2,3-dimethylmalate lyase	-	177481	173324	183064	171821	165335	152402	177956	163186	0.081161	-0.125007	UNCHANGED
Ce_fissilis.013763.1	13	13740.4	Fructose-bisphosphate aldolase 3, chloroplastic	Carbohydrate metabolic process; generation of precursor metabolites and energy; nucleobase-containing compound metabolic process; catabolic process	178581	155517	157943	153712	186892	174356	164014	171654	0.562948	0.0656846	UNCHANGED
Ce_fissilis.012880.1	6	13672.6	Nucleoside diphosphate kinase 1	Nucleobase-containing compound metabolic process; response to stress; biosynthetic process; response to chemical	160219	177376	185157	209766	209213	184045	174251	201008	0.075864	0.206085	UNCHANGED
Ce_fissilis.009300.1	10	13593.9	Mitochondrial outer membrane protein porin of 34 kDa	Transport	295484	261219	271730	237183	251068	214993	276144	234415	0.0459877	-0.236361	UNCHANGED
Ce_fissilis.009079.1	20	13419.6	3-ketoacyl-CoA thiolase 2, peroxisomal	-	346530	333804	303854	226020	272313	217885	328063	238739	0.0134415	-0.458536	UNCHANGED
Ce_fissilis.001215.1	4	12793.8	Leucine-rich repeat protein 1	-	321339	324758	318812	370345	390811	312323	321637	357826	0.199466	0.153828	UNCHANGED
Ce_fissilis.011699.1	34	12561.5	V-type proton ATPase catalytic subunit A	Transport; metabolic process	179432	180883	189679	192845	230170	204386	183331	209134	0.0880392	0.189971	UNCHANGED
Ce_fissilis.002927.1	10	12141.4	Calmodulin-related protein	Signal transduction	145756	146455	160845	161042	177646	121299	151019	153329	0.900922	0.0219037	UNCHANGED
Ce_fissilis.018575.1	23	12083.1	Aldehyde dehydrogenase family 2 member B4, mitochondrial	-	245769	243229	274396	246364	260584	240392	254465	249113	0.669828	-0.0306638	UNCHANGED
Ce_fissilis.013983.1	12	12034.4	Elongation factor 1-beta 1	-	114173	109592	122150	85069.4	103590	92765.1	115305	93808	0.0298062	-0.29767	UNCHANGED
Ce_fissilis.011006.1	6	11995.1	40S ribosomal protein S12	Translation	127362	134810	143378	114817	128286	106871	135183	116658	0.0758085	-0.212632	UNCHANGED
Ce_fissilis.015424.1	10	11852.7	Cytochrome b6-f complex iron-sulfur subunit, chloroplastic	Generation of precursor metabolites and energy	95531.7	104697	113278	53106	79750	77011.7	104502	69955.9	0.0250721	-0.579016	UNCHANGED
Ce_fissilis.013428.3	16	11739.5	Delta-1-pyrroline-5-carboxylate dehydrogenase 12A1, mitochondrial	Response to stress; catabolic process; response to abiotic stimulus; cellular process	81157.3	82938.2	84497	66798.3	67358.3	66168.6	82864.2	66775.1	9.59112e-05	-0.311439	UNCHANGED
Ce_fissilis.006747.1	6	11598	Stem-specific protein TSJT1	-	90864	85082.7	85499	71814.7	65526	73319.3	87148.6	70220	0.00501629	-0.311595	UNCHANGED
Ce_fissilis.009906.2	28	11510.5	UTP--glucose-1-phosphate uridylyltransferase	Carbohydrate metabolic process; generation of precursor metabolites and energy; nucleobase-containing compound metabolic process	150194	159856	158622	141601	147467	136130	156224	141733	0.0315022	-0.140443	UNCHANGED
Ce_fissilis.007253.1	29	11443.8	RuBisCO large subunit-binding protein subunit alpha, chloroplastic	Transport; cellular component organization	189907	200064	198913	161231	181639	177052	196295	173307	0.0299318	-0.179692	UNCHANGED
Ce_fissilis.015546.1	18	11361.4	Calreticulin-1	Cellular protein modification process	160081	163120	167891	144500	154790	117998	163697	139096	0.0928572	-0.234952	UNCHANGED
Ce_fissilis.001833.1	31	11151.1	Chaperonin 60 subunit beta 1, chloroplastic	Transport; cellular component organization	192033	201863	201892	134573	141144	128424	198596	134714	0.000203803	-0.559938	UNCHANGED
Ce_fissilis.011946.2	8	11076.5	Acidic endochitinase	Carbohydrate metabolic process	209054	214553	208470	217432	194507	228199	210693	213379	0.803783	0.0182819	UNCHANGED
Ce_fissilis.013428.1	12	11033.9	Probable aldehyde dehydrogenase	Response to stress; catabolic process; response to abiotic stimulus; cellular process	67099.9	70417.5	76976	67181.6	71167.7	73159.4	71497.8	70502.9	0.783902	-0.0202159	UNCHANGED
Ce_fissilis.000745.1	13	10932	Alpha-galactosidase 1	Carbohydrate metabolic process	87538.5	87826	100404	111987	115959	113907	91922.7	113951	0.00741841	0.309917	UNCHANGED
Ce_fissilis.009947.2	8	10571.4	Probable NAD(P)H dehydrogenase (quinone) FQR1-like 1	Metabolic process	155876	154795	169959	127274	154424	127058	160210	136252	0.0809246	-0.233687	UNCHANGED
Ce_fissilis.015325.3	7	10554.7	MLP-like protein 31	Response to stress	154399	150676	158987	156658	161836	133596	154687	150697	0.680623	-0.0377068	UNCHANGED
Ce_fissilis.001535.1	4	10402.6	Cold shock domain-containing protein 4	-	87940	96382	102653	100572	107758	99662.3	95658.2	102664	0.231646	0.101971	UNCHANGED
Ce_fissilis.004732.1	21	10326.8	Aldehyde dehydrogenase family 2 member B7, mitochondrial	Metabolic process	184031	188200	193049	244013	238170	223181	188427	235121	0.00226443	0.319402	UNCHANGED
Ce_fissilis.001324.1	10	9916.13	Probable phospholipid hydroperoxide glutathione peroxidase	Response to stress; metabolic process; cellular process; response to chemical	231723	250030	274621	307835	320906	265262	252125	298001	0.0931235	0.241182	UNCHANGED
Ce_fissilis.016614.1	3	9830.97	60S acidic ribosomal protein P1-1	Translation; cellular protein modification process	62886.3	54652	54631.3	58806	47918.7	32220	57389.9	46314.9	0.247751	-0.309321	UNCHANGED
Ce_fissilis.010970.1	13	9806.59	Elongation factor 1-delta	-	128520	127493	134848	116296	145129	134984	130287	132136	0.842999	0.020331	UNCHANGED
Ce_fissilis.005796.1	5	9735.19	Uncharacterized protein At2g37660, chloroplastic	-	75865.3	82872.3	86649.3	72574.3	75635	70559.3	81795.7	72922.9	0.0636675	-0.165653	UNCHANGED
Ce_fissilis.015021.1	3	9584.43	Glycine-rich RNA-binding protein 3, mitochondrial	-	101956	107571	107027	137604	112551	116326	105518	122161	0.106001	0.211291	UNCHANGED
Ce_fissilis.017791.1	11	9569.32	Uncharacterized isomerase BH0283	Biosynthetic process	77062.7	83900.7	97092.7	97468.3	109865	104885	86018.7	104073	0.0588699	0.274871	UNCHANGED
Ce_fissilis.010535.1	12	9549.91	14-3-3 protein 4	-	81694.3	88403	96767.3	93041	94243	82600.7	88954.9	89961.6	0.86876	0.0162354	UNCHANGED
Ce_fissilis.002621.1	9	9470.61	Glutathione S-transferase F9	-	112249	105906	91589	86976.3	90269.3	84168.7	103248	87138.1	0.064446	-0.244735	UNCHANGED
Ce_fissilis.012685.1	23	9425.28	Protein disulfide-isomerase	Response to stress; cellular homeostasis	133828	133846	142267	155044	153518	128880	136647	145814	0.362732	0.0936789	UNCHANGED
Ce_fissilis.019038.1	11	9411.33	Peroxidase 4	Response to stress; catabolic process; cellular process; response to chemical	170055	154523	137309	163529	182511	169552	153962	171864	0.178691	0.158692	UNCHANGED
Ce_fissilis.010199.1	11	9067.33	Basic secretory protease	-	85801.7	95231.3	104427	109792	106173	103099	95153.3	106355	0.121521	0.160556	UNCHANGED
Ce_fissilis.013030.1	8	9049.64	Chitinase 4	Carbohydrate metabolic process; catabolic process; cellular process	58395.7	77427.7	95242	70688.7	29693.7	69677	77021.8	56686.4	0.302271	-0.442263	UNCHANGED
Ce_fissilis.001259.1	19	8784.4	Elongation factor Tu, chloroplastic	-	258183	263465	259582	272117	166829	240294	260410	226413	0.337348	-0.201825	UNCHANGED
Ce_fissilis.018863.1	11	8756.9	Thiol protease aleurain	Protein metabolic process	65065.7	80222.3	87388.7	126474	98381.3	95257.7	77558.9	106704	0.070646	0.460255	UNCHANGED
Ce_fissilis.017963.1	17	8666.98	Selenium-binding protein 2	-	122885	131940	148197	106866	112263	97187.7	134341	105439	0.0284794	-0.34949	UNCHANGED
Ce_fissilis.012710.1	7	8664.35	Peroxiredoxin-2	Response to stress; catabolic process; cellular homeostasis; response to chemical	94327.7	111589	121662	152506	157899	137007	109193	149138	0.016993	0.449768	UNCHANGED
Ce_fissilis.016893.2	20	8621.48	Probable UDP-arabinopyranose mutase 2	Nucleobase-containing compound metabolic process	73197.3	75175.7	78198	79763.7	68838.1	64671.4	75523.7	71091.1	0.40167	-0.0872602	UNCHANGED
Ce_fissilis.012992.1	13	8568.64	Proteasome subunit alpha type-2-A	Catabolic process; cellular process; protein metabolic process	107653	107440	116872	131244	159365	143373	110655	144661	0.0175248	0.386602	UNCHANGED
Ce_fissilis.013029.1	10	8517.44	Chitinase 4	Carbohydrate metabolic process; catabolic process; cellular process	40600	79161.3	110594	132352	103043	119489	76785	118295	0.131525	0.623491	UNCHANGED
Ce_fissilis.018166.1	10	8425.13	CBS domain-containing protein CBSX3, mitochondrial	-	116497	116322	108666	137017	123516	114353	113828	124962	0.190465	0.13463	UNCHANGED
Ce_fissilis.017826.1	5	8314.59	2-haloacrylate reductase	Response to stress; metabolic process; response to light stimulus; cellular process; response to chemical	42890.1	34493.3	38556.6	26036.4	25459.5	27135.7	38646.7	26210.5	0.00734726	-0.560199	UNCHANGED
Ce_fissilis.016026.1	8	8300.11	Endo-1,3	-	77132	75939	82752.7	89424	108588	98534	78607.9	98848.8	0.0268004	0.330549	UNCHANGED
Ce_fissilis.014343.1	10	8298.63	Proteasome subunit alpha type-5	Catabolic process; cellular process; protein metabolic process	66178	69836.3	72281.3	99420	115680	87000	69431.9	100700	0.0211588	0.536393	UNCHANGED
Ce_fissilis.002694.1	3	8242.47	60S acidic ribosomal protein P0-1	Biological_process	35958.7	43659.3	37916	39312	28054	30705	39178	32690.3	0.189539	-0.26118	UNCHANGED
Ce_fissilis.014363.1	13	8180.73	Short-chain dehydrogenase TIC 32, chloroplastic	Metabolic process	133401	141298	139569	166322	181484	133798	138089	160535	0.190822	0.217288	UNCHANGED
Ce_fissilis.010970.2	9	8180.42	Elongation factor 1-delta	-	37971.2	35513.4	35143.7	24288.7	29417.1	28294.7	36209.4	27333.5	0.00773869	-0.405696	UNCHANGED
Ce_fissilis.000008.1	2	8167.57	Chlorophyll a-b binding protein 3, chloroplastic	Generation of precursor metabolites and energy; cellular protein modification process; photosynthesis	142756	153784	158315	118221	134359	99547.3	151619	117376	0.0364433	-0.369311	UNCHANGED
Ce_fissilis.001312.1	16	8146.99	Aldehyde dehydrogenase family 7 member B4	Metabolic process	87745	100151	112905	94213.3	86444	83884.7	100267	88180.7	0.200752	-0.185311	UNCHANGED
Ce_fissilis.015141.1	14	8071.97	Plastid-lipid-associated protein, chloroplastic	Metabolic process	143964	152206	163092	129110	110945	90758	153087	110271	0.0258822	-0.4733	UNCHANGED
Ce_fissilis.006337.1	6	8063.8	Ras-related protein RABD2a	Transport; signal transduction	22141	21991.6	24417.8	22414.8	21716.1	31602.5	22850.1	25244.5	0.505935	0.143766	UNCHANGED
Ce_fissilis.002282.2	15	7992.82	Caffeic acid 3-O-methyltransferase	Metabolic process	139372	144291	151540	160856	152238	149632	145068	154242	0.134359	0.0884702	UNCHANGED
Ce_fissilis.007184.1	5	7947.89	Eukaryotic translation initiation factor 6-2	Transport; cellular component organization	40016.7	46362.3	44801.3	46045	35353	34306.3	43726.8	38568.1	0.287517	-0.181109	UNCHANGED
Ce_fissilis.010325.2	8	7946.14	Berberine bridge enzyme-like 24	Metabolic process	115692	108473	104705	137133	164763	137406	109623	146434	0.0192846	0.4177	UNCHANGED
Ce_fissilis.002774.1	19	7926.57	Phosphoribulokinase, chloroplastic	Carbohydrate metabolic process; response to stress; response to external stimulus; response to biotic stimulus; response to abiotic stimulus	192848	250071	288419	224644	218828	221781	243780	221751	0.472747	-0.136637	UNCHANGED
Ce_fissilis.003679.1	7	7855.57	Ras-related protein RABE1c	-	59785.7	55025.8	56815.2	50068.6	40803.3	43384.5	57208.9	44752.1	0.0157168	-0.354282	UNCHANGED
Ce_fissilis.007862.1	5	7844.66	Fasciclin-like arabinogalactan protein 6	-	231579	243145	271862	211107	201404	219637	248862	210716	0.0434208	-0.240045	UNCHANGED
Ce_fissilis.016136.1	13	7798.58	Pyruvate dehydrogenase E1 component subunit beta-1, mitochondrial	Nucleobase-containing compound metabolic process; biosynthetic process	93531.3	96074	101415	130329	155274	152915	97006.8	146173	0.00403969	0.591515	UNCHANGED
Ce_fissilis.009651.3	18	7788.47	Cysteine synthase, chloroplastic/chromoplastic	Biosynthetic process; cellular process	48912.1	51839.5	58059	34962.2	39233.6	35583.4	52936.9	36593.1	0.00556757	-0.532703	UNCHANGED
Ce_fissilis.016893.1	20	7783.23	Probable UDP-arabinopyranose mutase 1	Nucleobase-containing compound metabolic process	64971.5	64327	67998.3	63765.7	69879.2	71436.2	65765.6	68360.4	0.374782	0.0558274	UNCHANGED
Ce_fissilis.009086.1	7	7739.23	Proteasome subunit beta type-6	Response to stress; cell death; catabolic process; response to external stimulus; response to biotic stimulus; protein metabolic process; response to chemical	76295	79060.7	88932	91494.7	89711.7	93116.7	81429.2	91441	0.0647624	0.167295	UNCHANGED
Ce_fissilis.003035.4	2	7668.05	6,7-dimethyl-8-ribityllumazine synthase, chloroplastic	Biosynthetic process; cellular process	94217.5	112559	104472	90142.5	62217	59867	103749	70742.2	0.0407561	-0.55246	UNCHANGED
Ce_fissilis.014541.1	14	7576.45	Adenosine kinase 2	Nucleobase-containing compound metabolic process; biosynthetic process	122866	116166	129536	152299	197642	184064	122856	178002	0.0168908	0.534921	UNCHANGED
Ce_fissilis.016025.1	10	7467.8	Endo-1,3	-	160132	149124	164682	129083	153207	132024	157979	138105	0.0891073	-0.19397	UNCHANGED
Ce_fissilis.001130.1	11	7459.4	Fructose-bisphosphate aldolase, cytoplasmic isozyme 1	Carbohydrate metabolic process; generation of precursor metabolites and energy; nucleobase-containing compound metabolic process; catabolic process	11062.1	20432.7	12285.6	13569.4	13678.7	13729.7	14593.5	13659.3	0.766668	-0.0954412	UNCHANGED
Ce_fissilis.005239.1	18	7459.15	Alanine aminotransferase 2, mitochondrial	Biosynthetic process	98099.3	109992	102020	127237	146069	137305	103371	136870	0.00661208	0.404983	UNCHANGED
Ce_fissilis.011776.1	8	7445.53	Glutelin type-D 1	-	83336.3	87948.3	98081.3	105549	143301	116449	89788.7	121766	0.0565413	0.43951	UNCHANGED
Ce_fissilis.005535.1	7	7361.82	Peroxidase 15	Response to stress; catabolic process; cellular process; response to chemical	258486	236682	242843	164315	197690	186900	246004	182968	0.00588418	-0.427088	UNCHANGED
Ce_fissilis.004006.1	11	7302.73	Malate dehydrogenase 1, mitochondrial	Carbohydrate metabolic process; generation of precursor metabolites and energy	72572.5	72250	83698.1	56383.3	67997	62471	76173.6	62283.8	0.0510931	-0.290434	UNCHANGED
Ce_fissilis.008921.1	9	7215.96	Late embryogenesis abundant protein Lea14-A	Response to stress; response to abiotic stimulus; response to chemical	140877	131866	127614	121953	118885	93364.3	133452	111401	0.0891798	-0.260561	UNCHANGED
Ce_fissilis.016894.1	13	7202.92	Probable UDP-arabinopyranose mutase 2	Nucleobase-containing compound metabolic process	33938.1	36146	35627.3	32139.4	31146.4	26225	35237.1	29836.9	0.0500909	-0.239999	UNCHANGED
Ce_fissilis.001196.1	11	7175.73	Ras-related protein Rab7	Transport; signal transduction	43616	48209.9	54196.9	61444.9	63964.7	58311.9	48674.3	61240.5	0.0223763	0.331327	UNCHANGED
Ce_fissilis.002282.1	11	7151.52	Caffeic acid 3-O-methyltransferase	Biosynthetic process; cellular process; secondary metabolic process	54076.6	71316.6	65115.2	81036.4	72913.2	57530.5	63502.8	70493.4	0.458978	0.150668	UNCHANGED
Ce_fissilis.004152.1	10	7123.14	Tropinone reductase-like 3	Metabolic process	84355.3	86934.7	90047.7	98698	94720	92622.7	87112.6	95346.9	0.0273995	0.130305	UNCHANGED
Ce_fissilis.002464.1	8	7108.8	Nascent polypeptide-associated complex subunit alpha-like protein	-	97885	122191	104517	117994	122042	91840.7	108198	110626	0.848606	0.0320153	UNCHANGED
Ce_fissilis.004061.1	13	7079.98	Malate dehydrogenase, glyoxysomal	Carbohydrate metabolic process; generation of precursor metabolites and energy	45080.3	47837.7	47733.9	44965.1	34143.3	34564	46884	37890.8	0.0695249	-0.307246	UNCHANGED
Ce_fissilis.007245.1	9	7022.3	Enoyl-[acyl-carrier-protein] reductase [NADH], chloroplastic	Lipid metabolic process; biosynthetic process; cellular process	106748	128558	128545	108400	94041.7	98015.2	121284	100152	0.066387	-0.27619	UNCHANGED
Ce_fissilis.002370.1	18	7000.32	ATP-dependent zinc metalloprotease FTSH 2, chloroplastic	Generation of precursor metabolites and energy; catabolic process; response to light stimulus; photosynthesis; cellular component organization; protein metabolic process	79503.7	83916	80383	64462.3	61416.7	42776.7	81267.6	56218.6	0.0222681	-0.531633	UNCHANGED
Ce_fissilis.018055.1	16	6966.97	Pectinesterase 3	Carbohydrate metabolic process; catabolic process; cellular component organization	138652	141671	140510	166326	166347	149035	140278	160570	0.0253896	0.194915	UNCHANGED
Ce_fissilis.000574.1	5	6960.19	Pathogenesis-related protein PR-4B	Response to stress; response to external stimulus; response to biotic stimulus	58512	63702	75286.7	95667.7	84228.7	93747	65833.6	91214.4	0.0140611	0.470438	UNCHANGED
Ce_fissilis.016182.1	9	6930.15	Tropinone reductase homolog At2g29360	Metabolic process	141474	148635	154192	124345	120636	117711	148100	120897	0.00280514	-0.292795	UNCHANGED
Ce_fissilis.001268.1	7	6808.53	Putative 4-hydroxy-4-methyl-2-oxoglutarate aldolase 2	Nucleobase-containing compound metabolic process	111476	92069.7	124556	154358	172024	165187	109367	163856	0.00713085	0.583251	UNCHANGED
Ce_fissilis.016683.1	6	6773.37	Aspartyl protease AED3	Cell death; catabolic process; protein metabolic process	114426	117259	123496	124850	165644	126446	118394	138980	0.204827	0.231287	UNCHANGED
Ce_fissilis.015457.1	9	6726.9	Protein usf	-	117228	121117	111113	101219	94186.3	100102	116486	98502.7	0.0078042	-0.241921	UNCHANGED
Ce_fissilis.002001.1	15	6662.43	Glutathione reductase, cytosolic	Generation of precursor metabolites and energy; cellular homeostasis; response to chemical	123628	111173	98259.3	144775	142247	112265	111020	133096	0.158503	0.261643	UNCHANGED
Ce_fissilis.008361.1	11	6657.32	Proteasome subunit alpha type-1-B	Catabolic process; cellular process; protein metabolic process	78390.3	81153.3	82620	93201.7	87684.7	82115.3	80721.2	87667.2	0.113009	0.11909	UNCHANGED
Ce_fissilis.005032.1	18	6553.11	DNA damage-repair/toleration protein DRT102	Carbohydrate metabolic process; response to stress; response to abiotic stimulus	99460.3	115392	109313	127078	81867	79419.3	108055	96121.4	0.501584	-0.168836	UNCHANGED
Ce_fissilis.009699.1	22	6471.23	Chaperonin CPN60-2, mitochondrial	Cellular process	210102	202035	170239	155872	149531	134238	194125	146547	0.0258614	-0.405624	UNCHANGED
Ce_fissilis.016317.1	11	6440.23	Glyoxylate/succinic semialdehyde reductase 1	Metabolic process	52802.7	60073.7	59164.7	35708.7	53528.7	41710	57347	43649.1	0.0745325	-0.393766	UNCHANGED
Ce_fissilis.009062.1	3	6357.1	Probable xyloglucan endotransglucosylase/hydrolase protein 23	Carbohydrate metabolic process; cellular component organization	44832.4	44445.6	49572.4	44302.4	52621.4	50936.2	46283.4	49286.7	0.377321	0.0907011	UNCHANGED
Ce_fissilis.016305.1	12	6313.06	Putative lactoylglutathione lyase	-	133341	139377	140482	119721	155940	116205	137733	130622	0.610607	-0.0764754	UNCHANGED
Ce_fissilis.018219.2	14	6200.87	2-alkenal reductase (NADP(+)-dependent)	Metabolic process	82418.1	90417	98303.7	97586.8	96469.4	91614.6	90379.6	95223.6	0.382202	0.0753225	UNCHANGED
Ce_fissilis.017980.1	9	6129.77	Proteasome subunit beta type-5-B	Catabolic process; cellular process; protein metabolic process	50577.3	48422	45704.7	57919.7	63174.3	56683.7	48234.7	59259.2	0.0106511	0.296969	UNCHANGED
Ce_fissilis.016597.1	4	6041.94	Probable L-gulonolactone oxidase 6	Metabolic process	19580.8	16425.6	15071.9	26263.9	26687.2	18540.3	17026.1	23830.5	0.0834585	0.485062	UNCHANGED
Ce_fissilis.016375.2	6	6002.76	Glycine-rich RNA-binding protein	-	73864.4	82468	101289	93782.6	73415	83351.9	85873.8	83516.5	0.825347	-0.0401575	UNCHANGED
Ce_fissilis.002720.1	8	5896.88	40S ribosomal protein SA	Translation; cellular component organization	91012.7	94407	96551	66995.7	81185.3	65663.7	93990.2	71281.6	0.0121694	-0.398982	UNCHANGED
Ce_fissilis.017839.2	12	5838.66	2-keto-3-deoxy-L-rhamnonate aldolase	-	115159	121376	119574	104503	99479.2	102352	118703	102111	0.00212698	-0.217212	UNCHANGED
Ce_fissilis.012930.1	14	5757.93	Malate dehydrogenase, chloroplastic	Carbohydrate metabolic process; generation of precursor metabolites and energy	74296.3	79986.7	91112	71050.3	87848.3	90140.7	81798.3	83013.1	0.883553	0.0212678	UNCHANGED
Ce_fissilis.016375.3	6	5735.42	Glycine-rich RNA-binding protein GRP1A	-	54732.6	61107.7	75053.9	92412.8	72342.7	82134.4	63631.4	82296.6	0.0888525	0.371095	UNCHANGED
Ce_fissilis.003226.1	16	5666.07	Ketol-acid reductoisomerase, chloroplastic	Biosynthetic process; cellular process	129515	128559	122211	107011	103261	95260.3	126762	101844	0.00388887	-0.315757	UNCHANGED
Ce_fissilis.012678.1	16	5665.35	Pyruvate kinase, cytosolic isozyme	Carbohydrate metabolic process; generation of precursor metabolites and energy; nucleobase-containing compound metabolic process; catabolic process	181493	143786	164549	103057	127636	100887	163276	110527	0.0190665	-0.562918	UNCHANGED
Ce_fissilis.018219.3	8	5544.32	2-alkenal reductase (NADP(+)-dependent)	Metabolic process	75808.5	80916.1	85709.4	109296	118403	103336	80811.3	110345	0.00484783	0.44939	UNCHANGED
Ce_fissilis.003525.1	2	5460.69	Ras-related protein RABD2a	Transport; signal transduction	55624.8	54665.3	62167.4	44142.7	56108.1	49052.7	57485.9	49767.8	0.13977	-0.207994	UNCHANGED
Ce_fissilis.016815.1	7	5456.44	Stress-response A/B barrel domain-containing protein UP3	-	81347.7	87106.7	97752.7	67052	69182.3	67137.3	88735.7	67790.6	0.012509	-0.38843	UNCHANGED
Ce_fissilis.017536.1	10	5333.58	Protein DJ-1 homolog D	-	124917	133152	138169	166014	178778	170492	132079	171761	0.00179588	0.379003	UNCHANGED
Ce_fissilis.017834.2	8	5258.22	Bifunctional epoxide hydrolase 2	-	59450.7	62987.3	68856.3	85731	75753.3	71984	63764.8	77822.8	0.0464273	0.287433	UNCHANGED
Ce_fissilis.003571.1	6	5236.26	MLP-like protein 43	Response to stress; cellular process	84678.7	76030.3	90170	58640	68797.3	57861.7	83626.3	61766.3	0.0156656	-0.437137	UNCHANGED
Ce_fissilis.017423.1	2	5176.14	Cytochrome b559 subunit alpha	Generation of precursor metabolites and energy; photosynthesis	292054	326914	328741	290351	306670	167930	315903	254984	0.250573	-0.309076	UNCHANGED
Ce_fissilis.014222.1	25	5158.91	Stromal 70 kDa heat shock-related protein, chloroplastic	Metabolic process; cellular process	59532.7	55348.6	58584.2	67215.8	72016.6	64580.9	57821.8	67937.7	0.0159047	0.232599	UNCHANGED
Ce_fissilis.000080.1	17	5146.38	6-phosphogluconate dehydrogenase, decarboxylating 2	Carbohydrate metabolic process; generation of precursor metabolites and energy; catabolic process	63217.7	71624.7	47968.8	48905.4	38987.8	31199.8	60937	39697.7	0.0692458	-0.618266	UNCHANGED
Ce_fissilis.008398.2	8	5117.54	Tubulin alpha-3 chain	Cellular component organization	27665	31126.9	35271.2	22107.7	28711.7	24359.2	31354.4	25059.5	0.0982422	-0.323306	UNCHANGED
Ce_fissilis.013697.2	5	5086.18	Photosynthetic NDH subunit of lumenal location 5, chloroplastic	Cellular protein modification process	82042.5	85983.7	88725	104795	76291.3	89898.5	85583.7	90328.3	0.604702	0.0778413	UNCHANGED
Ce_fissilis.003688.1	7	5042.03	6-phosphogluconate dehydrogenase, decarboxylating 1	Carbohydrate metabolic process; generation of precursor metabolites and energy; catabolic process	34656.8	36512.4	31871.8	35701.3	23798.4	26433	34347	28644.2	0.212979	-0.261939	UNCHANGED
Ce_fissilis.009745.2	17	5008.49	Probable cinnamyl alcohol dehydrogenase 1	Biosynthetic process; cellular process; secondary metabolic process	56969.2	60006.1	69799.2	81713.3	95324.4	86775.3	62258.2	87937.6	0.00980728	0.498217	UNCHANGED
Ce_fissilis.003917.1	16	4943.88	Quinone oxidoreductase PIG3	Metabolic process	72102	75241	79584	89845	113522	85849.3	75642.3	96405.4	0.0800847	0.349921	UNCHANGED
Ce_fissilis.005087.1	4	4919.78	Glutaredoxin	Generation of precursor metabolites and energy; cellular homeostasis; response to chemical	51405.7	55568.3	68046.3	40453.7	44970.7	40922	58340.1	42115.4	0.035548	-0.470139	UNCHANGED
Ce_fissilis.007805.1	4	4895.79	Nucleoside diphosphate kinase 2, chloroplastic	Nucleobase-containing compound metabolic process; response to stress; signal transduction; biosynthetic process; response to light stimulus; response to external stimulus; response to endogenous stimulus; response to chemical	37292.9	40512.1	43867	32673.5	30972.7	29701.8	40557.3	31116	0.0105747	-0.382304	UNCHANGED
Ce_fissilis.001679.1	9	4844.6	3-isopropylmalate dehydratase small subunit 3	-	46190	48422	53517	60626.3	52354.7	51030.3	49376.3	54670.4	0.226077	0.146941	UNCHANGED
Ce_fissilis.010338.1	12	4804.2	Aspartyl protease AED3	Protein metabolic process	93586	99139	118769	123037	122610	146729	103831	130792	0.0710363	0.333034	UNCHANGED
Ce_fissilis.007698.1	13	4729.33	Methylmalonate-semialdehyde dehydrogenase [acylating], mitochondrial	Nucleobase-containing compound metabolic process; catabolic process	108118	97773.3	110021	113192	119635	103290	105304	112039	0.330726	0.0894421	UNCHANGED
Ce_fissilis.018333.1	6	4718.63	2-alkenal reductase (NADP(+)-dependent)	Metabolic process	66580	73395.3	85012.7	77348.7	95662.7	95154.3	74996	89388.6	0.149296	0.253276	UNCHANGED
Ce_fissilis.009745.1	14	4681.35	Cinnamyl alcohol dehydrogenase 1	Biosynthetic process; cellular process; secondary metabolic process	88992.2	92817.8	102281	93514.5	102169	88309.2	94697.2	94664.2	0.995619	-0.00050305	UNCHANGED
Ce_fissilis.005115.2	4	4678.39	Ubiquitin-60S ribosomal protein L40	Translation; cellular protein modification process; catabolic process	100026	104802	111685	104458	103120	98285	105504	101955	0.410767	-0.0493745	UNCHANGED
Ce_fissilis.018295.1	7	4671.38	Putative allene oxide cyclase	-	89038	89411.3	90710.7	121051	129644	134510	89720	128402	0.000619633	0.517162	UNCHANGED
Ce_fissilis.011298.1	7	4601.87	Thioredoxin superfamily protein	-	70520.3	72816.3	85560.7	87072.3	92508.7	84312.3	76299.1	87964.4	0.0908929	0.205254	UNCHANGED
Ce_fissilis.013598.1	18	4586.33	D-3-phosphoglycerate dehydrogenase 1, chloroplastic	Biosynthetic process; cellular process	74180.7	69837	93491	60105.7	64442	55141.1	79169.6	59896.3	0.0677188	-0.40248	UNCHANGED
Ce_fissilis.000738.1	4	4582.8	Plasma membrane-associated cation-binding protein 1	-	88641.1	88734.5	81576.1	76258	79659	70862.3	86317.2	75593.1	0.0371871	-0.191393	UNCHANGED
Ce_fissilis.007829.1	8	4579.44	Plastid-lipid-associated protein 6, chloroplastic	-	69709.7	71187.3	85864	68360.3	61083.7	55686.7	75587	61710.2	0.0934613	-0.292629	UNCHANGED
Ce_fissilis.010672.2	8	4574.26	Superoxide dismutase [Mn], mitochondrial	Response to stress; metabolic process; cellular process; response to chemical	84880	91075.3	94344	84949.3	68886.3	71468	90099.8	75101.2	0.058139	-0.262687	UNCHANGED
Ce_fissilis.012598.1	13	4559.39	NADPH-dependent alkenal/one oxidoreductase, chloroplastic	Metabolic process; cellular process	65969.3	64782.3	68717.3	56888	61543.3	40493.3	66489.7	52974.9	0.10571	-0.327821	UNCHANGED
Ce_fissilis.011057.1	7	4478.11	Enoyl-[acyl-carrier-protein] reductase [NADH], chloroplastic	Lipid metabolic process; biosynthetic process; cellular process	81400.7	84489.1	87072.1	72828.9	50970	70386	84320.7	64728.3	0.0510157	-0.381489	UNCHANGED
Ce_fissilis.009651.1	13	4465.04	Cysteine synthase, chloroplastic/chromoplastic	Biosynthetic process; cellular process	29363.6	30859.2	33700.1	21618.2	23421.3	24484.3	31307.6	23174.6	0.00591395	-0.433969	UNCHANGED
Ce_fissilis.016930.1	11	4394.12	Fumarylacetoacetase	Catabolic process; cellular process	56887.7	59321.7	60049	73544.3	62321.7	65153	58752.8	67006.3	0.0779674	0.18964	UNCHANGED
Ce_fissilis.017019.1	12	4335.93	14-3-3-like protein	-	24872.1	24458.6	30158.4	31148.3	29179.8	31735.7	26496.4	30687.9	0.103044	0.211876	UNCHANGED
Ce_fissilis.019047.1	2	4328.5	PLAT domain-containing protein 2	Metabolic process; cellular process; response to chemical	69124	68832	76251.5	85416	98015	88909.5	71402.5	90780.2	0.0123083	0.346403	UNCHANGED
Ce_fissilis.015261.1	10	4216.1	Heat shock 70 kDa protein	-	66409.8	62148.6	68112.6	63257.1	79271.1	69436.3	65557	70654.8	0.364615	0.108039	UNCHANGED
Ce_fissilis.015561.1	8	4186.77	Proteasome subunit beta type-2-A	Catabolic process; cellular process; protein metabolic process	86856.3	100409	103438	94816	98640.3	94740	96901.1	96065.4	0.881424	-0.0124956	UNCHANGED
Ce_fissilis.001378.1	9	4162.09	Mitochondrial import receptor subunit TOM40-1	Transport; cellular component organization	80516.7	83079	85462.7	78550.3	89742.3	75894.7	83019.4	81395.8	0.735203	-0.0284953	UNCHANGED
Ce_fissilis.016186.1	10	4159.35	Adenosine kinase 2	Nucleobase-containing compound metabolic process; biosynthetic process	91364.9	79192.8	72656	77217.6	83909.3	88931.4	81071.2	83352.8	0.741279	0.0400406	UNCHANGED
Ce_fissilis.018219.1	9	4144.22	2-alkenal reductase (NADP(+)-dependent)	Metabolic process	23465.7	26078.7	28539.2	28111.6	32206.3	31425.5	26027.9	30581.1	0.0776261	0.232584	UNCHANGED
Ce_fissilis.007403.1	13	4132.93	Probable fructokinase-6, chloroplastic	Carbohydrate metabolic process; lipid metabolic process; biosynthetic process	74802.3	68712.3	77272	59922.4	52672.2	54512.7	73595.6	55702.4	0.00590296	-0.401878	UNCHANGED
Ce_fissilis.013077.1	15	4103.43	Aspartic proteinase A1	Lipid metabolic process; protein metabolic process	59605	60201.7	64071.7	73465.4	44077.6	53133.4	61292.8	56892.2	0.643331	-0.107487	UNCHANGED
Ce_fissilis.016024.1	10	4099.23	Class V chitinase	Carbohydrate metabolic process; response to stress; catabolic process; response to abiotic stimulus; response to endogenous stimulus; cellular process; response to chemical	117452	130690	138772	169476	185790	190000	128971	181756	0.0039189	0.494948	UNCHANGED
Ce_fissilis.003482.1	5	4021.1	Endochitinase	Carbohydrate metabolic process; catabolic process; cellular process	34682	50101	82426	91348	83323.3	109964	55736.3	94878.6	0.0722333	0.767464	UNCHANGED
Ce_fissilis.011945.1	11	3997.39	Succinate--CoA ligase [ADP-forming] subunit beta, mitochondrial	Generation of precursor metabolites and energy	113468	116706	133163	137810	151264	136076	121112	141717	0.0566679	0.226664	UNCHANGED
Ce_fissilis.000472.1	5	3976.27	Putative ATP synthase protein YMF19	-	92004	96957	101102	75343.7	54177.7	65144.7	96687.8	64888.7	0.00877897	-0.575367	UNCHANGED
Ce_fissilis.007218.1	3	3976.11	Kunitz trypsin inhibitor 2	Cellular process; protein metabolic process	36533	42007	47804.3	48910	46238.3	49128.3	42114.8	48092.2	0.152101	0.191477	UNCHANGED
Ce_fissilis.006549.1	4	3920.42	Elicitor-responsive protein 3	-	25107	22786	22726	19752.3	24300	13945.3	23539.7	19332.6	0.245926	-0.284062	UNCHANGED
Ce_fissilis.001213.1	6	3900.45	GDSL esterase/lipase 2	Lipid metabolic process	54564	55547.3	54131.3	52260.3	63370	59184.7	54747.6	58271.7	0.341348	0.09	UNCHANGED
Ce_fissilis.018656.1	13	3896.69	Aspartate aminotransferase, cytoplasmic	Biosynthetic process; cellular process	58595.3	61090.3	56587.3	90818.7	89430.3	79528.7	58757.7	86592.6	0.00182238	0.559466	UNCHANGED
Ce_fissilis.005415.1	11	3875.32	Glycerophosphodiester phosphodiesterase GDPDL3	Lipid metabolic process	125987	126807	127392	106310	109968	92567	126729	102948	0.0110225	-0.299822	UNCHANGED
Ce_fissilis.001060.1	6	3835.84	GTP-binding protein SAR1A	Transport; cellular component organization	32032.3	35798.3	34878	28226.3	25871	23302.3	34236.2	25799.9	0.00973835	-0.408159	UNCHANGED
Ce_fissilis.007536.1	19	3817.77	Heat shock 70 kDa protein, mitochondrial	Response to stress; response to external stimulus; response to biotic stimulus; response to abiotic stimulus; cellular process; response to chemical	162057	158578	151336	208680	195248	184102	157324	196010	0.00762199	0.317191	UNCHANGED
Ce_fissilis.017138.1	8	3771.45	Protein STRICTOSIDINE SYNTHASE-LIKE 4	Biosynthetic process	89820.3	90167	98216	93083	96053	86020.7	92734.4	91718.9	0.814203	-0.0158864	UNCHANGED
Ce_fissilis.009062.2	3	3760.96	Probable xyloglucan endotransglucosylase/hydrolase protein 25	Carbohydrate metabolic process; cellular component organization	57676.3	68821.3	75967.3	36291	22408.5	60829	67488.3	39842.8	0.0901895	-0.760318	UNCHANGED
Ce_fissilis.000685.1	16	3748.81	Dihydroxy-acid dehydratase, chloroplastic	Biosynthetic process; cellular process	106567	107898	108395	71278	85705.3	75786	107620	77589.8	0.00220391	-0.472006	UNCHANGED
Ce_fissilis.001041.1	6	3748.17	Peptidyl-prolyl cis-trans isomerase CYP19-3	Cellular protein modification process	33664	39786	39935.7	30346	31278	29787	37795.2	30470.3	0.0255996	-0.310799	UNCHANGED
Ce_fissilis.010088.1	5	3737.78	GDSL esterase/lipase At5g45920	-	41848	44938	48031.7	39882.7	43316	34882.7	44939.2	39360.4	0.139416	-0.191229	UNCHANGED
Ce_fissilis.009542.1	10	3694.39	Gamma carbonic anhydrase 1, mitochondrial	-	46014.4	46719.8	52556.5	58583.9	68764.8	75556.2	48430.3	67635	0.0229683	0.48186	UNCHANGED
Ce_fissilis.003446.1	9	3684.9	Mitochondrial outer membrane protein porin of 36 kDa	Transport	53802.7	57333	62411.3	79488.9	95849.3	78834.9	57849	84724.3	0.0116435	0.550484	UNCHANGED
Ce_fissilis.006144.1	4	3631.89	Fasciclin-like arabinogalactan protein 1	Biological_process	71355	76594.3	81915.3	52622.3	64719.7	55514	76621.6	57618.7	0.0161623	-0.411214	UNCHANGED
Ce_fissilis.017211.1	2	3624.08	Pathogenesis-related protein 1	-	45013.8	22073.3	24603.7	13936.7	16128.4	24840	30563.6	18301.7	0.19961	-0.739839	UNCHANGED
Ce_fissilis.016289.1	6	3607.44	Proteasome subunit alpha type-3	Catabolic process; cellular process; protein metabolic process	60256.3	60876.7	57513.7	49545.7	53966.3	55020	59548.9	52844	0.0271783	-0.172335	UNCHANGED
Ce_fissilis.004297.1	5	3597.7	(+)-neomenthol dehydrogenase	-	12407.3	13344.7	14682.9	22158.7	20414	13120.1	13478.3	18564.3	0.148452	0.461891	UNCHANGED
Ce_fissilis.014568.1	3	3596.77	60S acidic ribosomal protein P2B	Translation	34826.3	32929.3	42052	45297.7	77576	43676	36602.6	55516.6	0.171961	0.600974	UNCHANGED
Ce_fissilis.011918.1	7	3554.14	Cathepsin B-like protease 2	Protein metabolic process; regulation of molecular function	71606	72483	78340	66402.7	77435.7	71791.3	74143	71876.6	0.585156	-0.0447892	UNCHANGED
Ce_fissilis.005482.1	4	3514.17	ATP synthase subunit delta', mitochondrial	Nucleobase-containing compound metabolic process; transport; biosynthetic process	50617.3	64587.7	68488.3	98461.3	74445.3	37947.7	61231.1	70284.8	0.648636	0.198947	UNCHANGED
Ce_fissilis.017755.1	3	3488.34	Proteasome subunit beta type-7-B	Catabolic process; cellular process; protein metabolic process	29540.3	31133.3	32069.7	31753	20622	22427	30914.4	24934	0.165222	-0.310167	UNCHANGED
Ce_fissilis.006288.1	5	3464.55	Protein transport protein SEC13 homolog B	Transport; cellular component organization	35332.7	30820	35541.3	28433.3	32785.3	39789.3	33898	33669.3	0.953037	-0.009765	UNCHANGED
Ce_fissilis.017339.1	8	3450.8	Glutathione S-transferase F6	Metabolic process; cellular process	46411	43152	37375	38201	37206	29962.3	42312.7	35123.1	0.124246	-0.268669	UNCHANGED
Ce_fissilis.006370.1	6	3447.64	Cysteine proteinase 15A	Protein metabolic process	85809.3	67600.3	76818.5	59726	71148.7	72624.7	76742.7	67833.1	0.251465	-0.17804	UNCHANGED
Ce_fissilis.018172.1	9	3425.34	Proteasome subunit alpha type-6	Catabolic process; cellular process; protein metabolic process	64884.1	61754.4	58475.7	54527.2	48663	49626.4	61704.7	50938.9	0.0142233	-0.276615	UNCHANGED
Ce_fissilis.009977.1	13	3423.42	Glyceraldehyde-3-phosphate dehydrogenase A, chloroplastic	Carbohydrate metabolic process	109628	107123	106654	104363	95083.3	84241	107801	94562.3	0.0877661	-0.189039	UNCHANGED
Ce_fissilis.001988.1	11	3390.18	Probable 6-phosphogluconolactonase 4, chloroplastic	Carbohydrate metabolic process; generation of precursor metabolites and energy	53813.7	46294.7	50706	59731.3	62378.7	62830	50271.4	61646.7	0.00885529	0.294284	UNCHANGED
Ce_fissilis.019066.2	14	3387.05	Gamma aminobutyrate transaminase 1, mitochondrial	Biosynthetic process; cellular process	54630.7	52954	42234.7	43126.3	42890.3	47511.7	49939.8	44509.4	0.262124	-0.166078	UNCHANGED
Ce_fissilis.008517.2	10	3374.35	Metalloendoproteinase 3-MMP	Protein metabolic process	70510.3	68360	74808	58454.3	60468.3	74375	71226.1	64432.6	0.273145	-0.144616	UNCHANGED
Ce_fissilis.004237.1	12	3350.5	Transaldolase	Carbohydrate metabolic process; generation of precursor metabolites and energy	50590.3	57109	53448.7	62007.3	48887	41476.7	53716	50790.3	0.666133	-0.0807979	UNCHANGED
Ce_fissilis.013797.1	3	3335.32	Probable aldo-keto reductase 1	-	54853.3	52156.3	41270	42489.3	35156.3	57523	49426.6	45056.2	0.60441	-0.13356	UNCHANGED
Ce_fissilis.016813.1	7	3328.48	Gamma carbonic anhydrase 1, mitochondrial	-	21549.9	21779.5	27343.5	21010.8	20938.2	22417.1	23557.6	21455.4	0.342612	-0.134856	UNCHANGED
Ce_fissilis.000498.1	12	3323.63	2-methylacyl-CoA dehydrogenase, mitochondrial	Catabolic process; cellular process	45986	43528.7	48544.3	54163.7	66923	62963.3	46019.7	61350	0.0191777	0.414813	UNCHANGED
Ce_fissilis.013227.1	18	3285.33	Polyadenylate-binding protein 2	-	52737.7	74754.3	55254	56178	62807	56546	60915.3	58510.3	0.757786	-0.058114	UNCHANGED
Ce_fissilis.005619.1	12	3258.05	Beta-glucosidase BoGH3B	Carbohydrate metabolic process	85772.7	79823	76306.3	64360	64205.7	61995.3	80634	63520.3	0.00395272	-0.34417	UNCHANGED
Ce_fissilis.018908.1	9	3252.32	Bifunctional L-3-cyanoalanine synthase/cysteine synthase D1	Biosynthetic process; cellular process	35700.3	38291	42360.7	31913.3	29435.3	23114.3	38784	28154.3	0.0310259	-0.462104	UNCHANGED
Ce_fissilis.017753.1	3	3191.01	Isoflavone reductase homolog TP7	Biosynthetic process; cellular process; secondary metabolic process	20300.9	20175.6	21342.9	7969.9	22258.8	20156.3	20606.5	16795	0.44183	-0.295067	UNCHANGED
Ce_fissilis.002549.1	5	3181.57	Tropinone reductase homolog	Metabolic process	92284	97615.7	97739.3	74558.7	69424.7	63566	95879.7	69183.1	0.00185759	-0.470805	UNCHANGED
Ce_fissilis.018888.1	4	3165.9	Thioredoxin M4, chloroplastic	Metabolic process; cellular homeostasis	57545	50473.7	63793.3	45420.3	46608.7	37572.7	57270.7	43200.6	0.0422152	-0.406747	UNCHANGED
Ce_fissilis.011805.1	7	3132.19	NADH-cytochrome b5 reductase-like protein	Metabolic process	36285	38667	39323.3	35060.7	38545.7	33638.3	38091.8	35748.2	0.245938	-0.0916081	UNCHANGED
Ce_fissilis.011909.2	11	3132.04	Glutamate-1-semialdehyde 2,1-aminomutase, chloroplastic	Biosynthetic process; cellular process	40020.5	44238.9	47870.1	31375.6	37419.9	37882.3	44043.1	35559.3	0.0515296	-0.308691	UNCHANGED
Ce_fissilis.013698.1	5	3091.49	Peptidyl-prolyl cis-trans isomerase CYP20-3, chloroplastic	Cellular protein modification process; transport	121610	132176	116905	80173	99334.7	90178	123564	89895.2	0.00921062	-0.458938	UNCHANGED
Ce_fissilis.005744.1	3	3028.55	3-hydroxyacyl-[acyl-carrier-protein] dehydratase FabZ	Lipid metabolic process; response to stress; biosynthetic process; response to external stimulus; response to biotic stimulus; cellular process	66354	68235	74665	62782.3	34037.4	51670.4	69751.3	49496.7	0.0813364	-0.494888	UNCHANGED
Ce_fissilis.012931.1	12	3016.84	Photosystem II stability/assembly factor HCF136, chloroplastic	-	57441	58021	61536	36210.7	48235.7	42755	58999.3	42400.4	0.0109766	-0.476619	UNCHANGED
Ce_fissilis.012358.1	7	3009.89	26S proteasome non-ATPase regulatory subunit 4 homolog	Catabolic process; cellular component organization; protein metabolic process	53318.3	54338.3	63455.7	59270.3	69506.3	63205.3	57037.4	63994	0.188224	0.166027	UNCHANGED
Ce_fissilis.018880.1	3	3008.91	Nectarin-1	Transport; multicellular organism development; metabolic process; cellular process	95201	100188	113707	125861	103909	135126	103032	121632	0.159582	0.239433	UNCHANGED
Ce_fissilis.007375.1	6	2975.6	Branched-chain amino acid aminotransferase 2, chloroplastic	Biosynthetic process; cellular process	62026.3	66160.7	68389.3	44982.3	42915	42459.7	65525.4	43452.3	0.000397746	-0.592622	UNCHANGED
Ce_fissilis.010244.1	4	2943.41	Lactoylglutathione lyase	-	81265.3	83482.7	80071	61391	56808.7	47133.3	81606.3	55111	0.00358087	-0.566341	UNCHANGED
Ce_fissilis.018774.1	7	2930.59	14-3-3-like protein D	-	37065.3	34888.3	40655.2	51825.4	47899.2	55646.8	37536.3	51790.5	0.00701057	0.4644	UNCHANGED
Ce_fissilis.015062.2	11	2921.03	Hypersensitive-induced response protein 1	-	50595.7	64038	75830	43345.7	53645	40793.7	63487.9	45928.1	0.101278	-0.467104	UNCHANGED
Ce_fissilis.018746.1	9	2898.33	Adenylosuccinate synthetase 2, chloroplastic	Nucleobase-containing compound metabolic process; biosynthetic process	56304.7	57489.3	60869.7	39920.7	48652.7	33214.3	58221.2	40595.9	0.0195888	-0.520211	UNCHANGED
Ce_fissilis.018223.1	14	2885.31	6-phosphogluconate dehydrogenase, decarboxylating 3, chloroplastic	Carbohydrate metabolic process; generation of precursor metabolites and energy; response to stress; response to abiotic stimulus; response to endogenous stimulus; response to chemical	49356.7	45142.7	41119	27626.5	33484.5	49888.9	45206.1	36999.9	0.310574	-0.288995	UNCHANGED
Ce_fissilis.002939.2	4	2882.4	Peptide methionine sulfoxide reductase B2, chloroplastic	Response to stress; cellular process; protein metabolic process	17810.5	16199.9	20798.4	18543.6	17797.9	18056.4	18269.6	18132.6	0.924906	-0.0108542	UNCHANGED
Ce_fissilis.004964.1	14	2851.52	Tol-Pal system protein TolB	-	77028.7	73654.3	77436	60720.3	80329.3	60760.7	76039.7	67270.1	0.257011	-0.176787	UNCHANGED
Ce_fissilis.002293.1	8	2838.64	Peroxiredoxin-2F, mitochondrial	Metabolic process; cellular homeostasis; response to chemical	54723	60393	71205.3	80967.3	99706	78301	62107.1	86324.8	0.0431925	0.475016	UNCHANGED
Ce_fissilis.014022.1	7	2835.28	Succinate--CoA ligase [ADP-forming] subunit alpha-1, mitochondrial	Generation of precursor metabolites and energy; nucleobase-containing compound metabolic process; biosynthetic process	75505	79793.3	88425.7	69565.3	81264	83022.3	81241.3	77950.6	0.593459	-0.0596546	UNCHANGED
Ce_fissilis.003687.1	4	2829.09	Cyanate hydratase	Metabolic process; cellular process	33109	33285	38517.7	25998	27423.7	19758.3	34970.6	24393.3	0.0229939	-0.519654	UNCHANGED
Ce_fissilis.008924.1	2	2820.59	Late embryogenesis abundant protein, group 2	Response to stress; response to abiotic stimulus; response to chemical	29692	30218	31350.5	25982.5	51825	43078	30420.2	40295.2	0.263895	0.405579	UNCHANGED
Ce_fissilis.011671.2	4	2812.89	Profilin-4	-	90287	92916.3	82415.3	106160	92667.7	81953.7	88539.6	93593.8	0.546466	0.0800905	UNCHANGED
Ce_fissilis.014837.1	12	2799.01	Protochlorophyllide reductase, chloroplastic	Biosynthetic process; photosynthesis	69698.7	68146.4	62685	50694	44939.3	54270	66843.3	49967.8	0.00810347	-0.419786	UNCHANGED
Ce_fissilis.010897.1	4	2793.56	Heme-binding protein 2	-	50838	51388.7	60567.7	31471.5	51751	46613.7	54264.8	43278.7	0.184342	-0.326358	UNCHANGED
Ce_fissilis.002523.1	8	2761.38	Basic 7S globulin	Catabolic process; protein metabolic process	58876.3	68498.3	77483.7	52090	63439.3	51163	68286.1	55564.1	0.128985	-0.297439	UNCHANGED
Ce_fissilis.005981.1	12	2756.78	Epoxide hydrolase A	-	48341.3	57906	69581.7	58746.3	46182.7	57591.3	58609.7	54173.4	0.577915	-0.113553	UNCHANGED
Ce_fissilis.018743.1	3	2707.55	Peptidyl-prolyl cis-trans isomerase FKBP12	Cellular protein modification process	33324	37588	27936.7	33697.5	27640.7	42351.5	32949.6	34563.2	0.767557	0.0689787	UNCHANGED
Ce_fissilis.017714.1	17	2685.67	Succinate-semialdehyde dehydrogenase, mitochondrial	Catabolic process; cellular process	87196	77767.3	76064.7	65467	78240.7	66045.3	80342.7	69917.7	0.126546	-0.200509	UNCHANGED
Ce_fissilis.004017.1	5	2678.72	Ras-related protein Rab7	Transport; signal transduction	11657	11728.3	12831.4	14165.2	11986.5	13599.1	12072.2	13250.3	0.19386	0.134328	UNCHANGED
Ce_fissilis.014710.1	7	2651.42	Probable nitronate monooxygenase	Metabolic process; response to external stimulus; response to biotic stimulus; response to chemical	51137	55491	58556.7	49448	49354	49875	55061.6	49559	0.0633614	-0.151898	UNCHANGED
Ce_fissilis.003264.1	10	2611.09	Formate--tetrahydrofolate ligase	Nucleobase-containing compound metabolic process; biosynthetic process	66507	73308.3	74271.3	62696	80351.3	69384.3	71362.2	70810.6	0.927515	-0.0111961	UNCHANGED
Ce_fissilis.013307.1	6	2609.34	Glutamine synthetase nodule isozyme	Biosynthetic process; cellular process	19476.8	18492.2	20483.3	17113.7	23427	28678.5	19484.1	23073.1	0.349717	0.243913	UNCHANGED
Ce_fissilis.012378.2	7	2597.74	Mitochondrial carnitine/acylcarnitine carrier-like protein	-	20056.7	34135	22392	20013.3	42070.7	33591.3	25527.9	31891.8	0.458302	0.32111	UNCHANGED
Ce_fissilis.004356.1	11	2589.7	Secoisolariciresinol dehydrogenase	Metabolic process	46844	50607	63315	81020.3	72501.7	68994.3	53588.7	74172.1	0.0283658	0.468949	UNCHANGED
Ce_fissilis.005689.1	17	2586.55	LL-diaminopimelate aminotransferase, chloroplastic	Biosynthetic process	54771	50202.7	50936	43351.3	38113	33877.7	51969.9	38447.3	0.0118362	-0.434792	UNCHANGED
Ce_fissilis.006429.1	6	2582.16	Aconitate hydratase 2, mitochondrial	Generation of precursor metabolites and energy	11207.3	10257	7481.58	12456.4	17413	12013.1	9648.6	13960.9	0.10448	0.532995	UNCHANGED
Ce_fissilis.004297.2	3	2571.42	(+)-neomenthol dehydrogenase	Metabolic process	23117.7	25955.7	30038.3	17593.5	20025.3	30625	26370.6	22747.9	0.46376	-0.213192	UNCHANGED
Ce_fissilis.012740.1	13	2557.55	T-complex protein 1 subunit theta	Cellular process	58826	53229.7	50349	44181	37478	31849.3	54134.9	37836.1	0.0199592	-0.516795	UNCHANGED
Ce_fissilis.007214.1	14	2556.64	Beta-galactosidase 9	Carbohydrate metabolic process	71622.7	97373.7	96984.3	99918.7	108997	84041.7	88660.2	97652.3	0.467577	0.139368	UNCHANGED
Ce_fissilis.014602.1	6	2546.91	Isocitrate dehydrogenase [NAD] catalytic subunit 5, mitochondrial	Generation of precursor metabolites and energy	40006.3	33244	30935.3	23988.3	25234	28071	34728.6	25764.4	0.0395379	-0.430741	UNCHANGED
Ce_fissilis.000840.1	8	2546.02	Acetylornithine deacetylase	-	55214	50461.3	54353	44495.7	54379	47323.7	53342.8	48732.8	0.232865	-0.1304	UNCHANGED
Ce_fissilis.011103.1	3	2541.06	Expansin-like A1	Reproduction	43623.3	42659	50706.7	38309.7	44412.3	34905.5	45663	39209.2	0.161603	-0.219835	UNCHANGED
Ce_fissilis.015745.1	8	2523.39	Protein of unknown function, DUF642	-	58602.3	61772.7	63056.3	62492	61657.7	67727.3	61143.8	63959	0.290846	0.0649417	UNCHANGED
Ce_fissilis.018441.1	17	2511.39	Dipeptidyl aminopeptidase BIII	Protein metabolic process	62949.3	60646.7	66306	75354.7	72655.3	80095.3	63300.7	76035.1	0.00950193	0.264445	UNCHANGED
Ce_fissilis.004789.1	9	2505.98	S-adenosylmethionine synthase 1	Biosynthetic process; cellular process	45560.2	48630.1	30967.2	37152.3	30023.6	28963.2	41719.2	32046.3	0.183655	-0.380551	UNCHANGED
Ce_fissilis.004204.1	10	2502.27	Alcohol dehydrogenase-like 7	Metabolic process	106987	113509	121785	93464.7	98014	96066.3	114094	95848.3	0.0151899	-0.251395	UNCHANGED
Ce_fissilis.000218.1	3	2450.32	-	-	23156.5	25216.5	20105	30628	38577	31813	22826	33672.7	0.019825	0.5609	UNCHANGED
Ce_fissilis.017338.1	10	2426.74	Mitochondrial outer membrane protein porin 4	Transport	44340.3	49087	55282.7	70907.7	80684.7	73729	49570	75107.1	0.00402567	0.599482	UNCHANGED
Ce_fissilis.001601.1	10	2422.32	Mitochondrial dicarboxylate/tricarboxylate transporter DTC	Transport	60976.3	60860.3	71457.7	56772	67384.7	65244.7	64431.4	63133.8	0.799434	-0.0293529	UNCHANGED
Ce_fissilis.000235.1	8	2408.59	UDP-glucose 6-dehydrogenase 1	Nucleobase-containing compound metabolic process; biosynthetic process	11071.8	11525.5	10852.5	18135.3	20310.3	9567.59	11149.9	16004.4	0.213544	0.521433	UNCHANGED
Ce_fissilis.006783.1	11	2395.76	Betaine aldehyde dehydrogenase 1, chloroplastic	Metabolic process	44060.7	44927	45874.7	41007.7	42729	33303.3	44954.1	39013.3	0.113845	-0.204486	UNCHANGED
Ce_fissilis.018195.2	3	2338.37	Probable 3-hydroxyisobutyrate dehydrogenase, mitochondrial	Catabolic process; cellular process	25807	27601.7	29588.3	35727.5	22749	29373	27665.7	29283.2	0.699805	0.0819749	UNCHANGED
Ce_fissilis.011761.2	5	2335.39	Ras-related protein RABH1b	-	18529	18904	21642.7	19428.7	16360.7	16820.7	19691.9	17536.7	0.190673	-0.167227	UNCHANGED
Ce_fissilis.016121.1	5	2316.84	Enoyl-CoA delta isomerase 3	Lipid metabolic process; multicellular organism development; catabolic process; response to endogenous stimulus; cell growth; cell differentiation; response to chemical	45842.7	47096.7	53892.7	82672	57627.7	48604	48944	62967.9	0.252341	0.363484	UNCHANGED
Ce_fissilis.014316.2	4	2313.27	-	-	22015.7	23444.3	28939	41876.3	28005	34405	24799.7	34762.1	0.0927287	0.487195	UNCHANGED
Ce_fissilis.000463.1	7	2310.29	Mitochondrial phosphate carrier protein 3, mitochondrial	-	56081	44128.8	99267.3	78648.2	69723.1	77463.6	66492.4	75278.3	0.632137	0.179044	UNCHANGED
Ce_fissilis.015839.1	8	2308.95	Subtilisin-like protease SBT1.4	Protein metabolic process	48673	50117.3	46761.3	34441.7	32376	39164	48517.2	35327.2	0.00410256	-0.457717	UNCHANGED
Ce_fissilis.014757.1	8	2303.25	Isocitrate dehydrogenase [NAD] regulatory subunit 1, mitochondrial	Generation of precursor metabolites and energy	31133.1	31122.9	31528.7	32799	25764.9	32705	31261.6	30423	0.737434	-0.0392288	UNCHANGED
Ce_fissilis.011572.1	8	2274.86	Dihydrolipoyllysine-residue acetyltransferase component 4 of pyruvate dehydrogenase complex, chloroplastic	-	36327.5	38861.8	41924.7	35143.1	41979.6	30189.5	39038	35770.7	0.436321	-0.126102	UNCHANGED
Ce_fissilis.014984.2	6	2257.94	S-formylglutathione hydrolase	Catabolic process; cellular process; response to chemical	36146.7	34467	39044.3	29961.7	27217.7	22674.3	36552.7	26617.9	0.0167154	-0.457581	UNCHANGED
Ce_fissilis.009612.1	21	2252.51	Probable alpha-mannosidase At5g13980	Carbohydrate metabolic process; cellular protein modification process	54732.2	58041.5	58068.4	68178.5	76489.3	68627	56947.4	71098.3	0.00833318	0.320185	UNCHANGED
Ce_fissilis.008229.1	8	2209.79	Glyceraldehyde-3-phosphate dehydrogenase GAPCP1, chloroplastic	Carbohydrate metabolic process; generation of precursor metabolites and energy; nucleobase-containing compound metabolic process; catabolic process	22150	19930.5	21372.5	19429.5	12217	10566.5	21151	14071	0.0646306	-0.588002	UNCHANGED
Ce_fissilis.009374.1	4	2209.06	LysM domain-containing GPI-anchored protein 2	-	37809.7	39405.3	43854	52932.7	35679.7	38098.3	40356.3	42236.9	0.757543	0.0657085	UNCHANGED
Ce_fissilis.014143.1	9	2190.27	Porphobilinogen deaminase, chloroplastic	Cellular protein modification process; biosynthetic process	59811.7	74083.3	68895	49583.7	54208	48368	67596.7	50719.9	0.0204381	-0.414401	UNCHANGED
Ce_fissilis.003225.1	7	2177.83	Carbonic anhydrase, chloroplastic	Catabolic process; cellular process	123822	129644	126268	111751	116023	93622.7	126578	107133	0.0513736	-0.240628	UNCHANGED
Ce_fissilis.011254.2	7	2164.51	3-oxoacyl-[acyl-carrier-protein] synthase II, chloroplastic	Lipid metabolic process; biosynthetic process; cellular process	29792.7	30477	31611.7	21024.7	20653	22123	30627.1	21266.9	0.00017094	-0.5262	UNCHANGED
Ce_fissilis.009533.1	4	2156.85	Universal stress protein A-like protein	-	30053.7	22710.3	18334.3	25452.7	12287	17283.7	23699.4	18341.1	0.356003	-0.369772	UNCHANGED
Ce_fissilis.015110.1	4	2130.68	Cytochrome b5 isoform E	-	19767.7	24080.3	24792.7	16703.7	17896.3	19322.3	22880.2	17974.1	0.0480659	-0.348181	UNCHANGED
Ce_fissilis.016779.1	7	2128.73	Rhodanese-like domain-containing protein 4, chloroplastic	-	41986.2	47337.6	47356.2	36068.5	40760	35005.2	45560	37277.9	0.030079	-0.289446	UNCHANGED
Ce_fissilis.018164.1	2	2122.01	Cyclase-like protein 2	Catabolic process; cellular process	35461	34226.3	42818.3	26963	30870.3	34465.7	37501.9	30766.3	0.122446	-0.285611	UNCHANGED
Ce_fissilis.017834.1	6	2093.78	Epoxide hydrolase A	-	51430.5	68272.2	54706.3	87566.3	60401.7	56715.3	58136.3	68227.8	0.411203	0.230919	UNCHANGED
Ce_fissilis.013718.1	9	2092.1	Probable 3-hydroxyisobutyrate dehydrogenase-like 1, mitochondrial	Metabolic process	59027	49208.3	59420.3	43977.7	42960.7	48250	55885.2	45062.8	0.0434599	-0.310531	UNCHANGED
Ce_fissilis.013475.1	2	2086.72	S-norcoclaurine synthase 2	Cellular protein modification process; response to stress; signal transduction; response to endogenous stimulus; response to chemical	49865	52310.5	55329.5	65620.5	60670	60978.5	52501.7	62423	0.0116012	0.249714	UNCHANGED
Ce_fissilis.016105.1	3	2079.31	Ubiquitin-conjugating enzyme E2 36	Dna metabolic process; cellular protein modification process; response to stress; multicellular organism development; catabolic process; cell differentiation; response to chemical	32594	33349.7	31900	36107.5	41237.5	35054	32614.6	37466.3	0.0681115	0.200079	UNCHANGED
Ce_fissilis.004804.1	5	2025.36	Aromatic aminotransferase ISS1	Biosynthetic process	28538.7	26008.7	30406	26966	26993.7	23233	28317.8	25730.9	0.2207	-0.138207	UNCHANGED
Ce_fissilis.006751.1	16	2023.82	Alpha-L-arabinofuranosidase 1	Carbohydrate metabolic process	55006.3	53011	56152.7	50225	56687	58029	54723.3	54980.3	0.925386	0.00675954	UNCHANGED
Ce_fissilis.004604.1	6	2002.69	Protein SRC2	-	44186.7	44917	48519	44391	54056.7	48951.7	45874.2	49133.1	0.351939	0.0990119	UNCHANGED
Ce_fissilis.014540.1	8	1998.38	Ras-related protein RABB1c	Transport; signal transduction	18390.6	19074.6	21043.4	17708.7	20934.5	13997	19502.8	17546.7	0.415626	-0.152483	UNCHANGED
Ce_fissilis.003520.1	8	1996.24	Thiamine thiazole synthase, chloroplastic	Biosynthetic process	30423	32876.3	35041	23532	29782.3	18953.3	32780.1	24089.2	0.0634056	-0.444433	UNCHANGED
Ce_fissilis.003154.2	8	1978.6	4-hydroxy-tetrahydrodipicolinate reductase 2, chloroplastic	Biosynthetic process; cellular process	25625.7	28241.3	30752.7	27102.7	35395.3	35740.3	28206.6	32746.1	0.227555	0.215293	UNCHANGED
Ce_fissilis.015643.1	13	1974.35	Aspartate aminotransferase, chloroplastic	Response to stress; biosynthetic process; response to abiotic stimulus; cellular process; response to chemical	38188.7	36588	35318.7	29429.3	27337.7	23021.3	36698.4	26596.1	0.00803798	-0.464504	UNCHANGED
Ce_fissilis.003443.1	5	1961.07	Heme-binding-like protein At3g10130, chloroplastic	-	19232.3	21087	19715.7	20254	15592	15690	20011.7	17178.7	0.158211	-0.220223	UNCHANGED
Ce_fissilis.005711.1	8	1952.85	Protease Do-like 1, chloroplastic	Protein metabolic process	42961.7	38040.3	41717.7	29641	27003.3	26077.3	40906.6	27573.9	0.00185839	-0.569029	UNCHANGED
Ce_fissilis.000798.1	7	1933.65	Cinnamoyl-CoA reductase 1	Metabolic process	34947.3	35625.3	28433.7	33689	36979.7	43918.3	33002.1	38195.7	0.242203	0.210851	UNCHANGED
Ce_fissilis.009611.1	26	1927.81	Probable alpha-mannosidase At5g13980	Carbohydrate metabolic process	51272.8	58093.5	54178.6	74062.8	78682.4	74928.4	54515	75891.2	0.00092425	0.47728	UNCHANGED
Ce_fissilis.011070.2	5	1874.45	RNA-binding protein CP29B, chloroplastic	-	23551	26835.7	27145.7	26962	33078.7	21303.7	25844.1	27114.8	0.741196	0.0692438	UNCHANGED
Ce_fissilis.016610.2	7	1863.72	12-oxophytodienoate reductase 2	Metabolic process	33291.3	37929.3	37821.7	76231	50685.3	52151.3	36347.4	59689.2	0.050245	0.715617	UNCHANGED
Ce_fissilis.018173.1	8	1844.33	Importin subunit alpha-2	Transport	33923.3	35692.7	36634	25450.7	32855	36864.3	35416.7	31723.3	0.342964	-0.158884	UNCHANGED
Ce_fissilis.004268.1	5	1841.19	Stem-specific protein TSJT1	-	76651	85841	94230.3	89367.3	98370	87096.3	85574.1	91611.2	0.380705	0.0983499	UNCHANGED
Ce_fissilis.017944.1	11	1837.71	Alpha-xylosidase 1	Carbohydrate metabolic process; cellular process	113995	117430	110057	129655	128394	106921	113827	121657	0.365532	0.0959711	UNCHANGED
Ce_fissilis.000393.1	6	1824.77	3-oxoacyl-[acyl-carrier-protein] reductase, chloroplastic	Lipid metabolic process; biosynthetic process; cellular process	67320.3	60075	65740.3	78655	92731	73311.7	64378.6	81565.9	0.0501134	0.341386	UNCHANGED
Ce_fissilis.012548.1	7	1816.09	Eukaryotic translation initiation factor 3 subunit F	Embryo development; post-embryonic development; pollination; cellular component organization; response to chemical	19437.7	27096.3	27801.3	31870.7	35796.3	38840.3	24778.4	35502.4	0.0329506	0.518833	UNCHANGED
Ce_fissilis.002231.1	5	1807.01	-	-	13917	17372	17062	20265	19785.3	21019.7	16117	20356.7	0.0217161	0.336918	UNCHANGED
Ce_fissilis.001068.1	16	1789.07	Dihydrolipoyllysine-residue acetyltransferase component 2 of pyruvate dehydrogenase complex, mitochondrial	Metabolic process; cellular process	61977	61330.7	64003	57248	47200.3	51527.7	62436.9	51992	0.0258266	-0.264109	UNCHANGED
Ce_fissilis.012496.1	4	1783.98	DNA repair RAD52-like protein 2, chloroplastic	Dna metabolic process; response to stress	29295.3	24626.7	29167.3	28627.7	37794.7	38699.3	27696.4	35040.6	0.10842	0.339325	UNCHANGED
Ce_fissilis.004200.1	4	1781.93	2-keto-3-deoxy-L-rhamnonate aldolase	Metabolic process	42543.5	22789.3	25430.5	32139.4	30510.1	26983.7	30254.4	29877.7	0.955722	-0.0180752	UNCHANGED
Ce_fissilis.004271.1	9	1779.88	Aldehyde oxidase GLOX1	-	48273.3	49112.7	51385.7	67433	65125.7	57655.3	49590.6	63404.7	0.0111167	0.354524	UNCHANGED
Ce_fissilis.017165.1	6	1773.92	Flowering locus K homology domain	-	45646.7	42484.3	50945	38971.3	50025	43220	46358.7	44072.1	0.603078	-0.0729731	UNCHANGED
Ce_fissilis.011090.1	3	1762.63	Protein FATTY ACID EXPORT 2, chloroplastic	-	18737.7	19095	24453.7	20110.3	23944.7	22781.7	20762.1	22278.9	0.522951	0.101724	UNCHANGED
Ce_fissilis.011707.1	4	1756.66	Serine/threonine-protein phosphatase PP2A catalytic subunit	Cellular protein modification process	21795.6	8674.12	8589.39	19853.7	16464.9	18446.4	13019.7	18255	0.309033	0.487596	UNCHANGED
Ce_fissilis.007583.1	7	1746.29	Adenine phosphoribosyltransferase 1, chloroplastic	Nucleobase-containing compound metabolic process; biosynthetic process	39456.3	39399.7	42440	56440.7	42445.7	39242.3	40432	46042.9	0.355479	0.187481	UNCHANGED
Ce_fissilis.012274.1	2	1742.2	Aquaporin PIP2-7	Transport; response to endogenous stimulus; response to chemical	46933.5	42849	49327.5	32000	36140	41050	46370	36396.7	0.0365803	-0.349385	UNCHANGED
Ce_fissilis.018641.1	4	1741.74	Polyadenylate-binding protein RBP45	-	37748.3	42070	45158.9	42432	34384.3	43075.3	41659.1	39963.9	0.655837	-0.0599341	UNCHANGED
Ce_fissilis.008309.1	5	1725.23	Proteasome subunit beta type-3-A	Catabolic process; cellular process; protein metabolic process	26466.7	27856	30575	44386.7	21993.3	21661.7	28299.2	29347.2	0.897208	0.0524616	UNCHANGED
Ce_fissilis.017020.1	8	1721.19	Dihydrolipoyllysine-residue acetyltransferase component 5 of pyruvate dehydrogenase complex, chloroplastic	Carbohydrate metabolic process; generation of precursor metabolites and energy; nucleobase-containing compound metabolic process; catabolic process	56866.8	57651.8	58041.9	72573.3	75491.1	73462.2	57520.2	73842.2	6.1906e-05	0.360377	UNCHANGED
Ce_fissilis.009832.1	9	1713.17	Thiosulfate/3-mercaptopyruvate sulfurtransferase 1, mitochondrial	Metabolic process; cellular process	51372.7	46688.3	49020.3	45408.7	44931	41347	49027.1	43895.6	0.0511526	-0.159505	UNCHANGED
Ce_fissilis.010249.1	6	1711.36	Probable calcium-binding protein CML13	-	19337	19045.7	21814	22059	26127	20603.3	20065.6	22929.8	0.200704	0.192501	UNCHANGED
Ce_fissilis.018544.1	6	1686.49	Probable fructokinase-7	Carbohydrate metabolic process	6734.33	6069	6945.44	7231.71	12145	9749.21	6582.93	9708.63	0.0962043	0.560539	UNCHANGED
Ce_fissilis.010435.1	9	1681.3	3-isopropylmalate dehydratase large subunit, chloroplastic	Biosynthetic process; cellular process	42826.3	44393	48570	36347	45684.3	41649	45263.1	41226.8	0.275899	-0.134754	UNCHANGED
Ce_fissilis.003179.1	7	1668.78	Serine carboxypeptidase II-3	Catabolic process; cellular process; protein metabolic process	31303.3	28960	33977	21545.7	23120.3	21531.7	31413.4	22065.9	0.00374114	-0.509564	UNCHANGED
Ce_fissilis.001984.1	14	1644.55	NADH dehydrogenase [ubiquinone] iron-sulfur protein 1, mitochondrial	Generation of precursor metabolites and energy	51684.3	44699	48266.3	29266.7	36990.7	37087.3	48216.6	34448.2	0.0137676	-0.485099	UNCHANGED
Ce_fissilis.016851.1	8	1643.16	Nitrile-specifier protein 5	-	20826	21902	20238.7	20283.7	11713.7	16110.7	20988.9	16036	0.120984	-0.388311	UNCHANGED
Ce_fissilis.018233.1	10	1631.27	Diaminopimelate epimerase, chloroplastic	Biosynthetic process; cellular process	51986	58600.7	57501.3	49540	47816.7	40732.7	56029.3	46029.8	0.0417565	-0.283615	UNCHANGED
Ce_fissilis.012967.2	7	1630.36	Glutathione S-transferase L3	-	31214.7	32992.1	36083.3	37159.7	44475.7	34629.8	33430	38755.1	0.179484	0.21324	UNCHANGED
Ce_fissilis.018158.1	6	1626.21	Omega-amidase, chloroplastic	Metabolic process; cellular process	23230.3	22279.7	22606.3	19203	19621.3	21511	22705.4	20111.8	0.0272685	-0.174998	UNCHANGED
Ce_fissilis.015284.1	8	1625.44	Glutelin type-A 2	-	26940.3	28884.7	31230.7	34725.7	40636	44011.3	29018.6	39791	0.0225469	0.455466	UNCHANGED
Ce_fissilis.017820.1	6	1617.11	Adenosylhomocysteinase 1	Metabolic process; cellular process	33796	24270.3	10888.3	6939	7757.67	4535	22984.9	6410.56	0.0690501	-1.84216	UNCHANGED
Ce_fissilis.009153.1	10	1616.69	Aspartate-semialdehyde dehydrogenase	Biosynthetic process; cellular process	21234.3	22268	23852.7	20484.3	24691.7	28617.7	22451.7	24597.9	0.433701	0.131712	UNCHANGED
Ce_fissilis.009610.1	22	1610.35	Alpha-mannosidase At3g26720	Carbohydrate metabolic process	53172.7	51697.7	51413.7	56050.3	60854.7	82726.7	52094.7	66543.9	0.153895	0.353171	UNCHANGED
Ce_fissilis.010160.2	2	1604.69	Uncharacterized protein OsI_027940	-	43518.8	46824.7	54372.6	56147.6	48671.2	48264.5	48238.7	51027.7	0.534526	0.0810914	UNCHANGED
Ce_fissilis.014280.2	7	1597.59	Serine/threonine-protein phosphatase PP2A-3 catalytic subunit	Cellular protein modification process	21238.7	23678	25297.3	21339.3	16850	20410	23404.7	19533.1	0.0987301	-0.260874	UNCHANGED
Ce_fissilis.014865.2	4	1591.32	Probable aldo-keto reductase 1	Metabolic process	6437.09	5418.99	3510.35	4269.79	4096.33	4404.71	5122.14	4256.94	0.372533	-0.26693	UNCHANGED
Ce_fissilis.001837.1	10	1562.64	Omega-hydroxypalmitate O-feruloyl transferase	-	30867	31735	31211.7	50534.7	38389.3	49651.7	31271.2	46191.9	0.0189646	0.562804	UNCHANGED
Ce_fissilis.014181.1	5	1555.42	Polyadenylate-binding protein 8	-	22100.9	24206.6	25669.5	23483	23360.2	20974.4	23992.3	22605.9	0.352455	-0.0858756	UNCHANGED
Ce_fissilis.015355.1	3	1545.99	Succinate dehydrogenase subunit 6, mitochondrial	-	21922.3	20433.5	21113	13632	16629	27621	21156.3	19294	0.685531	-0.132934	UNCHANGED
Ce_fissilis.017454.1	8	1523.73	Protein disulfide isomerase-like 1-4	Response to stress; cellular homeostasis	37283	39376	38902	46809.7	50912	41596	38520.3	46439.2	0.0459434	0.269724	UNCHANGED
Ce_fissilis.018430.1	2	1513.11	Protein disulfide-isomerase	Cellular homeostasis	32216	46402.5	53945.5	57028	74032	67513.5	44188	66191.2	0.0526083	0.582984	UNCHANGED
Ce_fissilis.002060.1	6	1501.27	Probable glucan endo-1,3-beta-glucosidase A6	Carbohydrate metabolic process	30043.7	31808.3	35103	32971	31618.7	29323	32318.3	31304.2	0.608106	-0.0459955	UNCHANGED
Ce_fissilis.001167.2	5	1497.31	Thylakoid lumenal 15 kDa protein 1, chloroplastic	-	24889.3	26555.3	22247.7	14056.7	19379	15516.3	24564.1	16317.3	0.0151495	-0.590147	UNCHANGED
Ce_fissilis.015954.1	9	1489.83	Gamma carbonic anhydrase-like 1, mitochondrial	-	47970.7	48750.3	52245	53917.7	57277.7	51687.3	49655.3	54294.2	0.0906285	0.12885	UNCHANGED
Ce_fissilis.016765.1	8	1486.44	(R,S)-reticuline 7-O-methyltransferase	Metabolic process	53453.7	58350.3	68386.7	53317.7	52323.7	37254.7	60063.6	47632	0.141792	-0.334559	UNCHANGED
Ce_fissilis.014152.1	6	1484.6	Aldose 1-epimerase	Carbohydrate metabolic process	38541	38800.3	40519	26616	24969.3	29583.3	39286.8	27056.2	0.00118766	-0.538083	UNCHANGED
Ce_fissilis.002488.1	9	1484.04	Enolase 1, chloroplastic	Carbohydrate metabolic process; generation of precursor metabolites and energy; nucleobase-containing compound metabolic process; catabolic process	25682.7	29890.3	33277.3	39890.3	42410.3	43822.7	29616.8	42041.1	0.00743346	0.505386	UNCHANGED
Ce_fissilis.017696.1	3	1480.29	Endo-1,3	-	16485.3	28142.5	25264.5	32005	11692	16398.5	23297.4	20031.8	0.668134	-0.217877	UNCHANGED
Ce_fissilis.000204.1	6	1478.7	Beta-hexosaminidase 1	Carbohydrate metabolic process	57226.7	61003	59800.7	59702.3	45926.7	55141.3	59343.4	53590.1	0.242778	-0.147122	UNCHANGED
Ce_fissilis.003449.2	6	1462.54	Enoyl-[acyl-carrier-protein] reductase, mitochondrial	Metabolic process	16815	17280	20696	16670.3	18182.7	18430.7	18263.7	17761.2	0.72702	-0.0402456	UNCHANGED
Ce_fissilis.018172.2	6	1460.48	Proteasome subunit alpha type-6	Catabolic process; cellular process; protein metabolic process	26474.2	29919.9	28170	28084.1	29647.3	28342	28188	28691.1	0.672843	0.0255213	UNCHANGED
Ce_fissilis.015941.1	2	1452.24	Single-stranded DNA-binding protein WHY1, chloroplastic	Nucleobase-containing compound metabolic process; response to stress; biosynthetic process	34513.5	35978.5	40183	32575	34686.5	34076.5	36891.7	33779.3	0.160866	-0.127154	UNCHANGED
Ce_fissilis.006615.1	7	1447.38	GDSL esterase/lipase 2	Lipid metabolic process	39453	36906.3	42128.7	74878	44467	33614.3	39496	50986.4	0.407984	0.368407	UNCHANGED
Ce_fissilis.002002.1	6	1434.01	Uncharacterized protein At1g32220, chloroplastic	Biosynthetic process; cellular process	32966.3	37759.7	45909.7	34328.7	27060	30623.3	38878.6	30670.7	0.130356	-0.342115	UNCHANGED
Ce_fissilis.008042.1	3	1409.86	5'-methylthioadenosine/S-adenosylhomocysteine nucleosidase 1	Nucleobase-containing compound metabolic process	35232.3	38297.7	43668.7	34083	26949	19719.7	39066.2	26917.2	0.065465	-0.537392	UNCHANGED
Ce_fissilis.017776.1	7	1406.09	Octicosapeptide/Phox/Bem1p family protein	-	29525	32035.3	34695	37692.7	47793.7	44147	32085.1	43211.1	0.0282435	0.429498	UNCHANGED
Ce_fissilis.010160.1	3	1401.07	Uncharacterized protein OsI_027940	-	40264.1	49788.2	62123.6	34859.9	41230.9	46889	50725.3	40993.3	0.248896	-0.307319	UNCHANGED
Ce_fissilis.009689.2	6	1386.34	Ras-related protein RABB1b	-	16982.4	17515.4	19461.9	23615.4	28757.3	14274.6	17986.6	22215.8	0.38157	0.304664	UNCHANGED
Ce_fissilis.014316.1	2	1365.62	-	-	20588.5	18973.5	26954.5	23281.5	23373	15767	22172.2	20807.2	0.71681	-0.0916692	UNCHANGED
Ce_fissilis.011270.1	5	1354.27	Protein GrpE	Cellular process	40741.3	45623.3	51444.3	42843	47308	32919	45936.3	41023.3	0.403045	-0.163191	UNCHANGED
Ce_fissilis.004678.1	6	1339.31	2-dehydro-3-deoxyphosphooctonate aldolase 1	Biosynthetic process	14807.7	15536	18675.7	16231.3	18221.7	15756.3	16339.8	16736.4	0.791932	0.0346047	UNCHANGED
Ce_fissilis.011506.1	2	1338.66	ferredoxin-related	-	7552	7623	9741.5	10872.5	14671	21215	8305.5	15586.2	0.0789426	0.908127	UNCHANGED
Ce_fissilis.003162.1	3	1330.9	Non-symbiotic hemoglobin 1	Transport; cellular component organization; response to chemical	52729	54295	31067	40367	16535	22884	46030.3	26595.3	0.133395	-0.791412	UNCHANGED
Ce_fissilis.003776.1	7	1322.53	UDP-D-apiose/UDP-D-xylose synthase 2	-	25884.3	26873	26409	20828.7	20961.7	21164	26388.8	20984.8	5.7146e-05	-0.330581	UNCHANGED
Ce_fissilis.011004.1	8	1321.98	UDP-glucose 4-epimerase GEPI48	Carbohydrate metabolic process	31750.3	35486.3	38174.3	46733.7	40720	50861	35137	46104.9	0.0345783	0.391929	UNCHANGED
Ce_fissilis.016601.1	13	1320.59	Glucose-6-phosphate isomerase 1, chloroplastic	Carbohydrate metabolic process; generation of precursor metabolites and energy; nucleobase-containing compound metabolic process; catabolic process; biosynthetic process	43926.3	41800.7	45194.7	37809.7	51354.3	44141.7	43640.6	44435.2	0.853513	0.0260342	UNCHANGED
Ce_fissilis.002901.3	2	1305.52	Non-classical arabinogalactan protein 30	-	40124	43247.5	57980.5	46566.5	44180.5	53985	47117.3	48244	0.865651	0.0340916	UNCHANGED
Ce_fissilis.016925.1	3	1301.82	Inosine-5'-monophosphate dehydrogenase 2	Nucleobase-containing compound metabolic process; biosynthetic process	31965.3	32932.7	33512.7	47003	47206	42364.5	32803.6	45524.5	0.0015033	0.472791	UNCHANGED
Ce_fissilis.006939.1	3	1291.73	Bifunctional nitrilase/nitrile hydratase NIT4A	Metabolic process	15969.7	11552	9743.67	6036.33	9497.5	9691.5	12421.8	8408.44	0.14184	-0.562961	UNCHANGED
Ce_fissilis.018179.1	4	1288.19	Probable plastid-lipid-associated protein 13, chloroplastic	-	30290.7	32475	33386.3	29012	28409	29829.5	32050.7	29083.5	0.0420526	-0.140153	UNCHANGED
Ce_fissilis.014897.1	4	1281.62	L-idonate 5-dehydrogenase	Carbohydrate metabolic process; catabolic process; cellular process	16988	16942	15408.3	18244.3	14835.9	20879.7	16446.1	17986.6	0.44609	0.129178	UNCHANGED
Ce_fissilis.011997.1	2	1281.01	PsbP-like protein 1, chloroplastic	Photosynthesis	18567	22038.5	30283	15463	14386	16301	23629.5	15383.3	0.0790522	-0.619221	UNCHANGED
Ce_fissilis.010680.1	5	1269.92	NADH--cytochrome b5 reductase 1	Generation of precursor metabolites and energy	17457.3	18129.7	21632.3	26963.3	21794.3	23561.7	19073.1	24106.4	0.0650575	0.337879	UNCHANGED
Ce_fissilis.017280.1	5	1265.3	Ankyrin repeat domain-containing protein 2B	Transport	57512.7	59217.7	60355.3	65040.3	85596.7	67457.7	59028.6	72698.2	0.104783	0.300507	UNCHANGED
Ce_fissilis.012520.1	7	1263.58	Red chlorophyll catabolite reductase, chloroplastic	Catabolic process; cellular process	40023.3	46672.3	48388	44048	40534.7	32914	45027.9	39165.6	0.231566	-0.201233	UNCHANGED
Ce_fissilis.004962.1	2	1250.5	Phosphoglycerate mutase family protein	-	6039	6043	5735	4729	7018.5	5568	5939	5771.83	0.816983	-0.0411904	UNCHANGED
Ce_fissilis.002481.1	2	1230.06	NADH dehydrogenase [ubiquinone] iron-sulfur protein 7, mitochondrial	Metabolic process	36461.5	41650	39671.5	35486	29863	38756	39261	34701.7	0.203799	-0.178092	UNCHANGED
Ce_fissilis.018187.1	3	1184.12	Putative glucose-6-phosphate 1-epimerase	Carbohydrate metabolic process	17534.7	13912	9571	12711	22594	15367	13672.6	16890.7	0.438531	0.304943	UNCHANGED
Ce_fissilis.009651.2	4	1180.2	Cysteine synthase, chloroplastic/chromoplastic	Biosynthetic process; cellular process	17685	22946.8	26590.6	13574.1	17029.8	16930.1	22407.5	15844.6	0.0807438	-0.499983	UNCHANGED
Ce_fissilis.016896.1	6	1166.18	Spermidine coumaroyl-CoA acyltransferase	-	29878.3	32306.7	34817.3	46106.3	43722	37717.7	32334.1	42515.3	0.0239648	0.394926	UNCHANGED
Ce_fissilis.013745.1	5	1159.01	Far upstream element-binding protein 2	-	19701	27156.3	29182.7	36968.3	38183.7	38640	25346.7	37930.7	0.012633	0.581569	UNCHANGED
Ce_fissilis.003027.1	6	1125.46	Aspartic proteinase A1	Lipid metabolic process; catabolic process; protein metabolic process	50400	48501	59026.7	77800	68411.7	44517	52642.6	63576.2	0.353397	0.272258	UNCHANGED
Ce_fissilis.001894.1	6	1121.08	Erlin-2-B	Nucleobase-containing compound metabolic process; response to stress; signal transduction; biosynthetic process	27095.3	27827.3	25855	24178.3	23313.3	24076.3	26925.9	23856	0.00853009	-0.174642	UNCHANGED
Ce_fissilis.015356.1	3	1110.49	Chloroplast envelope quinone oxidoreductase homolog	Metabolic process	52859.3	52088	53422.3	38043	35149	57330	52789.9	43507.3	0.253887	-0.279003	UNCHANGED
Ce_fissilis.012967.1	3	1085.3	Glutathione S-transferase L3	Cellular protein modification process	22473.4	23269.8	23722.6	21155	21637.3	15783.6	23155.3	19525.3	0.130343	-0.245998	UNCHANGED
Ce_fissilis.007814.1	8	1061.14	Probable N-acetyl-gamma-glutamyl-phosphate reductase, chloroplastic	Nucleobase-containing compound metabolic process; biosynthetic process	40383.3	38562.7	35431	37387.7	40416.3	32909.3	38125.7	36904.4	0.664977	-0.046968	UNCHANGED
Ce_fissilis.015635.1	5	1052.95	Spermidine synthase	Biosynthetic process; cellular process	38767.7	43324.3	45368.7	36712	29880.3	32199.7	42486.9	32930.7	0.026897	-0.367586	UNCHANGED
Ce_fissilis.014783.1	7	1041.92	2-oxoisovalerate dehydrogenase subunit beta 1, mitochondrial	-	44193	45159	44846.7	54184	61967.7	52135.3	44732.9	56095.7	0.0194873	0.326553	UNCHANGED
Ce_fissilis.016498.1	8	1037.62	Subtilisin-like protease SBT1.7	Protein metabolic process	43269	48785.7	51576.3	42618	50903	43198.3	47877	45573.1	0.558847	-0.0711499	UNCHANGED
Ce_fissilis.002700.1	3	1028.58	L-ascorbate oxidase homolog	Transport; metabolic process	7564.02	8023.81	7526.15	5621.81	4920.23	5442.63	7704.66	5328.22	0.000847385	-0.532076	UNCHANGED
Ce_fissilis.019119.1	3	1023.9	UDP-glycosyltransferase 88B1	-	17970.7	19038.3	19967	15525.3	15128.3	11273.5	18992	13975.7	0.0271704	-0.442469	UNCHANGED
Ce_fissilis.015542.1	3	1022.45	Phospholipid hydroperoxide glutathione peroxidase 1, chloroplastic	Response to stress; metabolic process; cellular process; response to chemical	8920.67	10840.7	12794	10469.7	9622.33	11804.7	10851.8	10632.2	0.872724	-0.0294882	UNCHANGED
Ce_fissilis.010928.1	5	1018.18	Monothiol glutaredoxin-S17	Generation of precursor metabolites and energy; cellular homeostasis	18172.3	23902.3	15739	16375.3	25227	14481.3	19271.2	18694.6	0.894983	-0.0438299	UNCHANGED
Ce_fissilis.002924.1	9	1003.25	Beta-galactosidase 8	Carbohydrate metabolic process	41302	41913	44348	25687.3	35297.3	26627	42521	29203.9	0.0140844	-0.542015	UNCHANGED
Ce_fissilis.015290.2	4	998.128	3-hydroxyisobutyryl-CoA hydrolase-like protein 3, mitochondrial	Protein metabolic process	22244	21518	26321	17543.3	18897.5	15652	23361	17364.3	0.0274055	-0.42798	UNCHANGED
Ce_fissilis.015933.1	4	991.87	Probable acetyl-CoA acetyltransferase, cytosolic 2	Lipid metabolic process; catabolic process; cellular process	17060.6	15596	17263.7	14781.3	14534.2	11460.3	16640.1	13591.9	0.0625952	-0.291912	UNCHANGED
Ce_fissilis.016916.1	11	983.205	Non-specific phospholipase C3	Response to stress; cell communication; metabolic process; response to external stimulus	35870.7	24659.7	33089	26274.3	28690.3	24420	31206.4	26461.6	0.256795	-0.237946	UNCHANGED
Ce_fissilis.015802.1	5	977.878	Probable serine protease EDA2	Protein metabolic process	19442.7	18169	19162.3	18479	23480.3	21808.3	18924.7	21255.9	0.199856	0.167595	UNCHANGED
Ce_fissilis.004086.1	2	969.529	Non-specific lipid-transfer protein-like protein At2g13820	Transport	36509.5	36925	43922	47641.5	38077	36407.5	39118.8	40708.7	0.727101	0.0574726	UNCHANGED
Ce_fissilis.016574.1	4	955.609	Probable carboxylesterase 17	Catabolic process	17208.7	19759.3	22128.3	18880.5	25718	15047.7	19698.8	19882.1	0.959934	0.0133608	UNCHANGED
Ce_fissilis.011838.1	3	952.376	Tropinone reductase homolog At5g06060	Metabolic process	20134	20190.7	22503.7	12160.5	14999.5	14887	20942.8	14015.7	0.00464675	-0.579412	UNCHANGED
Ce_fissilis.019104.1	6	947.69	Farnesylcysteine lyase	Catabolic process; cellular process	24326.3	27174.7	30280.7	38036.3	41333.3	32900.3	27260.6	37423.3	0.027479	0.457123	UNCHANGED
Ce_fissilis.017489.2	4	946.96	RNA-binding protein CP33, chloroplastic	-	23575	25310	25123.7	16629.3	26240	13939	24669.6	18936.1	0.203326	-0.381592	UNCHANGED
Ce_fissilis.014484.1	2	945.606	Uncharacterized protein At4g14100	-	23771	25967.5	29974.5	23725.5	26385	26696.5	26571	25602.3	0.6606	-0.0535772	UNCHANGED
Ce_fissilis.005782.1	5	939.327	Protein TIC 40, chloroplastic	Transport; cellular component organization	18000	22658.7	22106	25450.3	26471.3	18624	20921.6	23515.2	0.417	0.168605	UNCHANGED
Ce_fissilis.014569.1	4	936.125	2-alkenal reductase (NADP(+)-dependent)	Metabolic process	42403.3	44661	52619.3	40437.3	37187	32630.3	46561.2	36751.6	0.0628866	-0.341324	UNCHANGED
Ce_fissilis.018735.1	3	933.682	Thioredoxin reductase 2	Response to stress; metabolic process; cellular process; response to chemical	16257	19482	20330	25762.7	18100.7	27246.3	18689.7	23703.2	0.180408	0.342842	UNCHANGED
Ce_fissilis.000114.1	11	912.135	Ultraviolet-B receptor UVR8	Response to light stimulus	35588.7	34766	35488.7	38007.3	43132.7	43954	35281.1	41698	0.0268782	0.241082	UNCHANGED
Ce_fissilis.016477.1	4	909.748	UBP1-associated protein 2C	-	11793.9	17583.3	18353.3	19454.8	15567.2	13806.8	15910.2	16276.3	0.897132	0.0328221	UNCHANGED
Ce_fissilis.018592.1	2	905.594	LysM domain-containing GPI-anchored protein 1	-	21808.5	21857.5	28176.5	21825.5	30075	18789	23947.5	23563.2	0.927716	-0.0233416	UNCHANGED
Ce_fissilis.013351.1	2	903.462	UDP-glycosyltransferase 73C5	-	35866.5	34650	42224.5	34111	57244	45867	37580.3	45740.7	0.31322	0.2835	UNCHANGED
Ce_fissilis.014596.1	6	899.801	Cell division protein FtsZ homolog 2-1, chloroplastic	Cellular component organization	27828	30515.7	34495.7	28807.7	33768.3	27154.3	30946.4	29910.1	0.727758	-0.0491404	UNCHANGED
Ce_fissilis.012734.1	9	885.072	Serine/threonine-protein phosphatase 2A 65 kDa regulatory subunit A beta isoform	Cellular protein modification process	37846.1	44584.8	50991.9	38969.5	46220.3	35900.7	44474.3	40363.5	0.446556	-0.139921	UNCHANGED
Ce_fissilis.006732.1	2	881.437	Glutathione S-transferase DHAR3, chloroplastic	Cellular protein modification process; response to chemical	15855	18782	20942.5	13233.5	21882	19866	18526.5	18327.2	0.950208	-0.0156066	UNCHANGED
Ce_fissilis.014129.1	3	867.432	3-oxo-Delta(4,5)-steroid 5-beta-reductase	Metabolic process	16537.2	13679.2	11436.9	15712	16318.7	19680.4	13884.4	17237.1	0.156365	0.312043	UNCHANGED
Ce_fissilis.008397.1	6	866.466	Peroxidase 73	Response to stress; catabolic process; cellular process; response to chemical	23028	26418	27160	31826.7	37312	42023.3	25535.3	37054	0.0229754	0.537134	UNCHANGED
Ce_fissilis.012774.2	5	865.688	Probable polygalacturonase	Carbohydrate metabolic process; cellular component organization	25877.3	21533.3	24419.3	14830.3	16766	18855	23943.3	16817.1	0.0145134	-0.509694	UNCHANGED
Ce_fissilis.018977.1	4	865.077	Fructose-1,6-bisphosphatase, chloroplastic	Carbohydrate metabolic process; biosynthetic process; cellular process	18747	19373.3	20661	12870	18697	13101	19593.8	14889.3	0.0769781	-0.396116	UNCHANGED
Ce_fissilis.010352.1	2	864.019	Protein of unknown function (DUF674)	Ubiquitin-dependent protein catabolic process	13965	16595	20003	18089	14713	13034	16854.3	15278.7	0.529989	-0.141601	UNCHANGED
Ce_fissilis.009843.1	5	858.983	Glutamate dehydrogenase 2	Metabolic process; cellular process	23478.4	20530	16722.4	14866	15643.4	12607.1	20243.6	14372.1	0.0528855	-0.494192	UNCHANGED
Ce_fissilis.019077.1	4	856.756	Bifunctional epoxide hydrolase 2	Cellular protein modification process	18698.3	19536.7	21070.3	18286.7	12777.7	10796.7	19768.4	13953.7	0.0683031	-0.502555	UNCHANGED
Ce_fissilis.018517.1	8	848.824	1-deoxy-D-xylulose 5-phosphate reductoisomerase, chloroplastic	Lipid metabolic process; biosynthetic process; cellular process	30291.3	29798.7	33116.7	29995.3	29379.3	26440.7	31068.9	28605.1	0.177438	-0.119198	UNCHANGED
Ce_fissilis.018922.1	3	835.444	Proline iminopeptidase	Protein metabolic process	30638.5	28868.5	25223.5	27226	28369	24890	28243.5	26828.3	0.496599	-0.0741614	UNCHANGED
Ce_fissilis.018852.1	3	832.859	PsbP domain-containing protein 1, chloroplastic	Photosynthesis	8612.67	10650.3	10674	6098	7234	7484	9979	6938.67	0.0195202	-0.524237	UNCHANGED
Ce_fissilis.010986.2	5	827.411	Histone deacetylase 5	-	22929.7	21476.7	20684.3	21044	26420.3	25356	21696.9	24273.4	0.219251	0.161891	UNCHANGED
Ce_fissilis.017395.1	8	825.452	Beta-D-xylosidase 4	Carbohydrate metabolic process; catabolic process; cellular process	26688.7	31823	36497.3	26725	30484	28607.3	31669.7	28605.4	0.369546	-0.146812	UNCHANGED
Ce_fissilis.002384.1	2	820.502	Peptidyl-prolyl cis-trans isomerase FKBP16-3, chloroplastic	Cellular protein modification process	37473	40536	46920.5	29832	33760	27686.5	41643.2	30426.2	0.0273654	-0.452767	UNCHANGED
Ce_fissilis.002366.1	2	816.657	ACT domain-containing protein ACR12	-	32181.3	35428	34477	32942	27374.7	20456	34028.8	26924.2	0.130128	-0.337851	UNCHANGED
Ce_fissilis.017570.1	2	810.449	Short-chain dehydrogenase TIC 32, chloroplastic	-	24738.5	25427	21806	23935	15881	17684.5	23990.5	19166.8	0.146367	-0.323851	UNCHANGED
Ce_fissilis.004398.1	4	806.022	Ubiquitin receptor RAD23c	Dna metabolic process; response to stress; catabolic process; protein metabolic process	6813.3	7884.66	11410.1	6179.99	4859.91	6948.74	8702.68	5996.21	0.148899	-0.537408	UNCHANGED
Ce_fissilis.008783.1	3	788.639	Bifunctional aspartate aminotransferase and glutamate/aspartate-prephenate aminotransferase	Biosynthetic process	16553.7	16392.3	16907.7	13357.3	24991.7	15210.7	16617.9	17853.2	0.749579	0.103447	UNCHANGED
Ce_fissilis.011695.2	4	787.282	Acyl-coenzyme A oxidase 4, peroxisomal	Reproduction; lipid metabolic process; catabolic process; embryo development; post-embryonic development; cellular process	11831.3	11064	11449.7	8759	8081	12800.5	11448.3	9880.17	0.351903	-0.21253	UNCHANGED
Ce_fissilis.017444.1	3	787.066	Carbamoyl-phosphate synthase small chain, chloroplastic	Nucleobase-containing compound metabolic process; biosynthetic process	15689.7	15111	16062	16157.7	19788.7	24466	15620.9	20137.4	0.135475	0.366404	UNCHANGED
Ce_fissilis.006579.1	3	786.608	Coatomer subunit delta	Transport	13435.3	14446.3	16497	10965.7	12328	10059.3	14792.9	11117.7	0.0301395	-0.41205	UNCHANGED
Ce_fissilis.013952.1	4	785.208	Naringenin,2-oxoglutarate 3-dioxygenase	Metabolic process	14028.7	13209.3	9306.33	16352.3	16327.3	18507.3	12181.4	17062.3	0.0398875	0.48613	UNCHANGED
Ce_fissilis.007894.1	3	784.73	Actin-related protein 4	-	9211.19	9279.86	9063.04	7121.17	7634.18	9484.51	9184.7	8079.95	0.200012	-0.184885	UNCHANGED
Ce_fissilis.008972.1	5	767.744	ATP-dependent (S)-NAD(P)H-hydrate dehydratase	Nucleobase-containing compound metabolic process	17807.7	18679	21549	24117	26797	25993	19345.2	25635.7	0.010385	0.406175	UNCHANGED
Ce_fissilis.008343.1	2	755.155	Adenylylsulfatase HINT1	-	33403.5	34369.5	39448	42508.5	53031	51888	35740.3	49142.5	0.024797	0.459418	UNCHANGED
Ce_fissilis.011003.1	3	743.87	Enoyl-CoA hydratase 2, peroxisomal	Lipid metabolic process; catabolic process; cellular process	13545.3	17600.7	19009.7	16942.5	23819.3	25173	16718.6	21978.3	0.157496	0.394628	UNCHANGED
Ce_fissilis.017817.1	7	741.632	Histidinol dehydrogenase, chloroplastic	Biosynthetic process; cellular process	16685	17529	18374	20205.3	15907	15841.7	17529.3	17318	0.896405	-0.0174988	UNCHANGED
Ce_fissilis.007298.1	3	734.938	Uncharacterized protein At2g34460, chloroplastic	-	20980.5	23773	19400.3	16182	14237	13250	21384.6	14556.3	0.0114239	-0.554926	UNCHANGED
Ce_fissilis.016181.3	2	734.802	Tropinone reductase homolog At2g29170	Metabolic process	17468.8	19592.2	20229	19404.1	14846.4	10687	19096.7	14979.2	0.195473	-0.350363	UNCHANGED
Ce_fissilis.018214.2	6	729.095	Serine carboxypeptidase-like 46	Catabolic process; cellular process; protein metabolic process	16923.7	19680.3	22766.3	28369	28528	26415	19790.1	27770.7	0.0118105	0.488782	UNCHANGED
Ce_fissilis.017159.1	5	719.111	Subtilisin-like protease SBT1.7	Protein metabolic process	18423	19251	22010.7	16392.3	16986.3	14037.3	19894.9	15805.3	0.0440689	-0.331986	UNCHANGED
Ce_fissilis.007256.1	7	715.505	Protein transport protein SEC31 homolog B	Transport	31886	30130	37700.3	26980.3	32028.3	18940	33238.8	25982.9	0.177933	-0.355305	UNCHANGED
Ce_fissilis.001012.1	2	708.57	Probable plastid-lipid-associated protein 4, chloroplastic	-	22365	25621.5	23835	21848.5	13417	13669	23940.5	16311.5	0.0595396	-0.553564	UNCHANGED
Ce_fissilis.015448.1	7	698.992	Beta-fructofuranosidase, soluble isoenzyme I	Carbohydrate metabolic process	37545.7	37984	41968	39598	35714.3	35610.7	39165.9	36974.3	0.318205	-0.0830736	UNCHANGED
Ce_fissilis.015290.1	4	694.1	3-hydroxyisobutyryl-CoA hydrolase-like protein 3, mitochondrial	Protein metabolic process	19800	23019	28422.3	19641.7	32407.5	28865.1	23747.1	26971.4	0.518637	0.18368	UNCHANGED
Ce_fissilis.009974.1	2	691.793	V-type proton ATPase subunit C	Transport; cellular component organization; cell growth; anatomical structure development	32723	33927.5	35099	36757	20411	31972	33916.5	29713.3	0.439382	-0.190877	UNCHANGED
Ce_fissilis.007317.1	5	688.452	Lysosomal Pro-X carboxypeptidase	Protein metabolic process	50610	51726	54851	65709.7	51223.3	61630	52395.7	59521	0.188158	0.183951	UNCHANGED
Ce_fissilis.010376.1	2	678.16	Serine hydroxymethyltransferase 4	Biosynthetic process; cellular process	18805	11539	9056	6867.5	6280.5	5113.5	13133.3	6087.17	0.0766226	-1.10939	UNCHANGED
Ce_fissilis.017100.1	2	676.332	Tropinone reductase homolog At5g06060	Metabolic process	12288.5	12204.4	15110.8	13696.4	11185	18356	13201.2	14412.5	0.627426	0.126646	UNCHANGED
Ce_fissilis.013945.1	4	675.549	Aminoacylase-1	Cellular process; protein metabolic process	19400.7	21504.3	20747	18352	22274.7	20042.7	20550.7	20223.1	0.812336	-0.0231802	UNCHANGED
Ce_fissilis.018290.1	5	669.338	Probable pyridoxal 5'-phosphate synthase subunit PDX1	Biosynthetic process; cellular process	35383.7	35187.7	37304.3	38370.3	38749.3	36235.7	35958.6	37785.1	0.151912	0.0714828	UNCHANGED
Ce_fissilis.010976.1	3	662.863	Tropinone reductase homolog At5g06060	Metabolic process	7151.7	8055.42	9287.12	5725.65	4824	8861.47	8164.75	6470.37	0.284171	-0.33556	UNCHANGED
Ce_fissilis.014101.1	3	657.475	Dihydropyrimidine dehydrogenase (NADP(+)), chloroplastic	Nucleobase-containing compound metabolic process; catabolic process	14338	15106.3	17355.7	12015.5	11445	10965.5	15600	11475.3	0.0124539	-0.44301	UNCHANGED
Ce_fissilis.005099.1	5	652.776	Acetylglutamate kinase, chloroplastic	Biosynthetic process	21299	18465	25456.3	15579.7	19764.7	17024.3	21740.1	17456.2	0.145262	-0.316618	UNCHANGED
Ce_fissilis.018079.3	2	651.886	Protein DJ-1 homolog B	Metabolic process; cellular process	21835.5	22121.5	27263.5	26303.5	30323.5	29132.5	23740.2	28586.5	0.0851028	0.268004	UNCHANGED
Ce_fissilis.000227.1	3	649.623	Gamma-glutamyl hydrolase 2	Cellular process; protein metabolic process	23155.7	21552	10476	7893	10544	9158	18394.6	9198.33	0.0861469	-0.999834	UNCHANGED
Ce_fissilis.004702.1	2	641.714	ABC transporter I family member 6, chloroplastic	Reproduction; transport; embryo development; post-embryonic development; cellular component organization	5699.5	7495	10292	8333.5	5498.5	8161	7828.83	7331	0.774072	-0.0947873	UNCHANGED
Ce_fissilis.012174.1	2	634.619	Single-stranded DNA-binding protein WHY2, mitochondrial	Dna metabolic process; response to stress; biosynthetic process	10660	10279.5	11042.5	11230	18163	14731	10660.7	14708	0.114786	0.464303	UNCHANGED
Ce_fissilis.015731.1	6	632.491	Ureidoglycolate hydrolase	-	21419.3	23811.3	26437	20173.3	17866	19421	23889.2	19153.4	0.0415874	-0.318756	UNCHANGED
Ce_fissilis.015435.1	3	630.469	Fructose-1,6-bisphosphatase, chloroplastic	Carbohydrate metabolic process; biosynthetic process; cellular process	41105.3	41448	40458.3	32895.7	53422.5	29038	41003.9	38452.1	0.753087	-0.0927	UNCHANGED
Ce_fissilis.003393.1	2	626.256	Biotin carboxyl carrier protein of acetyl-CoA carboxylase	-	16891	18430	20378.5	19576	21098	15886	18566.5	18853.3	0.884128	0.0221177	UNCHANGED
Ce_fissilis.012884.1	2	626.202	Macro domain-containing protein XCC3184	-	11844	13392.5	14515	12721.5	14006.5	17610.5	13250.5	14779.5	0.407981	0.157551	UNCHANGED
Ce_fissilis.000786.1	2	622.044	Reticulon-4-interacting protein 1, mitochondrial	Metabolic process	27610.5	27673.5	29160	17831	20061	21017.5	28148	19636.5	0.0013588	-0.519495	UNCHANGED
Ce_fissilis.000430.1	2	613.365	Universal stress protein PHOS32	-	23839	27798.5	30417	29524	25246.5	27495	27351.5	27421.8	0.976832	0.00370507	UNCHANGED
Ce_fissilis.006173.1	2	601.45	60S acidic ribosomal protein P2B	Translation	13157	13701	17470	28580.5	17436.5	16032	14776	20683	0.231847	0.48519	UNCHANGED
Ce_fissilis.018903.1	2	596.615	Ferredoxin-2, mitochondrial	Generation of precursor metabolites and energy	13410.5	9791	16566.5	12454	15110	14385	13256	13983	0.747994	0.0770284	UNCHANGED
Ce_fissilis.017736.1	3	589.967	Probable cinnamyl alcohol dehydrogenase	Biosynthetic process; cellular process; secondary metabolic process	10566.1	11452.1	11773	17644.7	15159.8	14129.7	11263.8	15644.8	0.0165585	0.473992	UNCHANGED
Ce_fissilis.015885.1	2	576.374	Shikimate O-hydroxycinnamoyltransferase	-	9534.5	11005.5	11483	10278	6936.5	9867	10674.3	9027.17	0.243236	-0.241801	UNCHANGED
Ce_fissilis.005583.2	2	572.965	Biotin carboxyl carrier protein of acetyl-CoA carboxylase 1, chloroplastic	Lipid metabolic process; biosynthetic process; cellular process	12033	14770	18011	27636.5	24441.5	17706	14938	23261.3	0.0705233	0.638947	UNCHANGED
Ce_fissilis.005050.1	2	570.538	SAL1 phosphatase	Lipid metabolic process; cellular process	34015.5	34996	39406.5	25413	30496.5	29609	36139.3	28506.2	0.0286926	-0.342296	UNCHANGED
Ce_fissilis.019012.1	2	568.927	Electron transfer flavoprotein subunit alpha, mitochondrial	Generation of precursor metabolites and energy; lipid metabolic process; catabolic process	19188	21006	23587.5	27197.5	32648.5	29708	21260.5	29851.3	0.0132919	0.48962	UNCHANGED
Ce_fissilis.015165.1	2	566.511	4-diphosphocytidyl-2-C-methyl-D-erythritol kinase, chloroplastic/chromoplastic	Lipid metabolic process; biosynthetic process	19926.5	20990.5	23427	18330.5	26428.5	21457.5	21448	22072.2	0.820423	0.0413851	UNCHANGED
Ce_fissilis.017422.1	3	562.545	Acetyl-coenzyme A carboxylase carboxyl transferase subunit beta, chloroplastic	Nucleobase-containing compound metabolic process; lipid metabolic process; biosynthetic process	21726	23216.7	26731	20959	24474	20244	23891.2	21892.3	0.369261	-0.126055	UNCHANGED
Ce_fissilis.012355.1	3	561.655	Bifunctional dTDP-4-dehydrorhamnose 3,5-epimerase/dTDP-4-dehydrorhamnose reductase	Nucleobase-containing compound metabolic process; biosynthetic process	13379.3	14855	10806.7	12340.7	14430	10706.5	13013.7	12492.4	0.760922	-0.0589781	UNCHANGED
Ce_fissilis.014513.1	2	555.429	Cytochrome c oxidase subunit 2	Generation of precursor metabolites and energy; transport	29804.5	25540	32977	21474.5	22589	26268.5	29440.5	23444	0.082056	-0.328583	UNCHANGED
Ce_fissilis.016326.1	2	540.633	5'-nucleotidase SurE	Metabolic process; cellular process	15763	20740	24927	18414	22766	21255.5	20476.7	20811.8	0.914727	0.0234232	UNCHANGED
Ce_fissilis.013080.1	2	537.706	UPF0603 protein At1g54780, chloroplastic	-	15367	18710	17768	13426	12781	10069	17281.7	12092	0.022235	-0.515189	UNCHANGED
Ce_fissilis.011754.1	2	536.362	Pyruvate kinase 1, cytosolic	Carbohydrate metabolic process; generation of precursor metabolites and energy; nucleobase-containing compound metabolic process; catabolic process	27617.5	17649	12449.5	8310	10240	6683	19238.7	8411	0.0767667	-1.19366	UNCHANGED
Ce_fissilis.009657.1	3	525.657	Cyclase-associated protein 1	Cellular component organization; anatomical structure development	15443.7	15497.7	13878.7	8582	12955.5	15846	14940	12461.2	0.31845	-0.261741	UNCHANGED
Ce_fissilis.009742.1	4	510.855	Peptidyl-prolyl cis-trans isomerase CYP38, chloroplastic	Cellular protein modification process	35019.7	27671.3	28501.7	24701	24524	22244.3	30397.6	23823.1	0.0553082	-0.351593	UNCHANGED
Ce_fissilis.017200.1	2	508.594	Acetolactate synthase 1, chloroplastic	Biosynthetic process; cellular process	24465	17790	13709	9810	13411.5	11096	18654.7	11439.2	0.0945656	-0.705555	UNCHANGED
Ce_fissilis.014150.1	2	505.037	Berberine bridge enzyme-like 13	Metabolic process	20729.5	18029.5	20167.5	14071	20924	13902	19642.2	16299	0.244903	-0.269171	UNCHANGED
Ce_fissilis.012275.1	2	504.335	Probable aquaporin PIP1-2	Transport; flower development	28001.5	27346	33046	15091	20633	26900	29464.5	20874.7	0.0899157	-0.497225	UNCHANGED
Ce_fissilis.008066.1	3	494.373	Putative 3,4-dihydroxy-2-butanone kinase	Carbohydrate metabolic process; catabolic process	7072	6214.5	8385.67	10837	9837.67	9665.67	7224.06	10113.4	0.0166558	0.485394	UNCHANGED
Ce_fissilis.000754.1	2	489.943	Heparanase-like protein 1	-	20609.5	21524.5	22255.5	25067.5	23564	22239.5	21463.2	23623.7	0.0843293	0.13837	UNCHANGED
Ce_fissilis.002115.2	4	488.963	Beta-fructofuranosidase, insoluble isoenzyme CWINV1	Carbohydrate metabolic process	26807.3	24202	7236.5	11983	34937	6985	19415.3	17968.3	0.897724	-0.111736	UNCHANGED
Ce_fissilis.015584.1	2	488.419	Alpha-amylase	Carbohydrate metabolic process	26738	29318.5	26037	24399	21551.5	20841.5	27364.5	22264	0.0258923	-0.297593	UNCHANGED
Ce_fissilis.018632.1	3	485.957	-	Metabolic process	11510.7	11528.7	13763	13722.3	11479	13633	12267.4	12944.8	0.553064	0.0775355	UNCHANGED
Ce_fissilis.001953.1	2	477.155	PsbP domain-containing protein 6, chloroplastic	Photosynthesis	10051	10498.5	13373.5	7738	9230.5	9530.5	11307.7	8833	0.103848	-0.356326	UNCHANGED
Ce_fissilis.018696.1	4	467.186	Xylulose kinase 2	Carbohydrate metabolic process	11765.7	12839.7	12706	11223.7	11491.3	11920.3	12437.1	11545.1	0.0863927	-0.107369	UNCHANGED
Ce_fissilis.005135.1	2	438.464	Aldehyde dehydrogenase family 2 member C4	Biosynthetic process; cellular process; secondary metabolic process	21512	12775	12118	18885	19090	21332	15468.3	19769	0.241098	0.353922	UNCHANGED
Ce_fissilis.013426.1	3	432.749	Aspartyl protease family protein 2	Protein metabolic process	32354	30949.3	30975.7	25664	28851.3	24794	31426.3	26436.4	0.0193193	-0.249446	UNCHANGED
Ce_fissilis.014077.1	2	428.97	Putative dihydroflavonol 4-reductase	Lipid metabolic process; signal transduction; response to endogenous stimulus; response to chemical	10514.5	10937	12490	19108	16503	11978	11313.8	15863	0.103831	0.487578	UNCHANGED
Ce_fissilis.013488.1	2	420.666	Vacuolar protein sorting-associated protein 26A	Transport	197340	204674	108585	120073	127150	84737	170200	110653	0.150592	-0.621183	UNCHANGED
Ce_fissilis.002033.1	4	385.955	Monocopper oxidase-like protein SKU5	Transport; metabolic process	23696.7	22568.3	23827.7	10897.7	12942	23184	23364.2	15674.6	0.114529	-0.575876	UNCHANGED
Ce_fissilis.012882.1	2	385.856	Protein ASPARTIC PROTEASE IN GUARD CELL 1	Response to stress; response to external stimulus; response to biotic stimulus; response to abiotic stimulus; response to endogenous stimulus; protein metabolic process; response to chemical	17060.5	18502.5	19537	13087.5	14165	17846.5	18366.7	15033	0.107123	-0.288957	UNCHANGED
Ce_fissilis.006611.2	2	385.54	Uncharacterized protein At4g13200, chloroplastic	-	18906	19955	22927	25098.5	28085.5	22479.5	20596	25221.2	0.0836887	0.292271	UNCHANGED
Ce_fissilis.018432.1	2	366.324	ATP-dependent Clp protease proteolytic subunit-related protein 4, chloroplastic	Catabolic process; cellular process; protein metabolic process	11620	11946	11626	9317.5	10885.5	10660	11730.7	10287.7	0.045038	-0.189369	UNCHANGED
Ce_fissilis.014176.1	2	326.504	Peptide methionine sulfoxide reductase A4, chloroplastic	Metabolic process	9865.5	12200	15580.5	14600.5	15541.5	19499	12548.7	16547	0.148417	0.399036	UNCHANGED
Ce_fissilis.002306.1	3	324.354	Subtilisin-like protease SBT1.6	Protein metabolic process	21823.7	21656.3	23509.3	13978	16211	14081	22329.8	14756.7	0.00127846	-0.597602	UNCHANGED
Ce_fissilis.011457.1	3	284.077	Enhancer of mRNA-decapping protein 4	-	11534.5	17128.3	9940.5	6892	4468	9937	12867.8	7099	0.0988629	-0.858075	UNCHANGED
